# Supplementary material for: Enantioselective synthesis of 8-membered lactone derivatives via organocatalytic cascade reactions
Source: Royal Society of Chemistry journal article supplement (doi:10.1039/d4qo00148f), 2024-01-01
Supplement: d4qo00148f1.pdf [file d4qo00148f1.pdf]

## Enantioselective Synthesis of Eight-Membered Lactone Derivatives via Organocatalytic Cascade Reactions

†Dong-Sheng Ji <sup>a,b</sup>, †Rui Zhang <sup>b</sup>, Xu-Yan Han <sup>b</sup>, Hai-Long Chai <sup>b</sup>, Yucheng Gu <sup>d</sup>,  
Xiu-Qin Hu <sup>b</sup> and Peng-Fei Xu <sup>b,c,\*</sup>

<sup>a</sup>College of Chemistry and Chemical Engineering, Northwest Normal University, Lanzhou, 730070, P. R. China

<sup>b</sup>State Key Laboratory of Applied Organic Chemistry & College of Chemistry and Chemical Engineering, Lanzhou University, Lanzhou, 730000, P. R. China

<sup>c</sup>MOE Frontiers Science Center for Rare Isotopes, Lanzhou University, Lanzhou 730000, P. R. China

<sup>d</sup>Syngenta Jealott's Hill International Research Centre, Bracknell, Berkshire, RG42 6EY, UK

† These authors contributed equally to this work.

[xupf@lzu.edu.cn](mailto:xupf@lzu.edu.cn)

## Contents

|                                                                            |     |
|----------------------------------------------------------------------------|-----|
| 1. General Information.....                                                | 3   |
| 2 General Procedures for the synthesis of substrates .....                 | 4   |
| 2.1 The general procedures for synthesis cyclobutanone carbonxester 1..... | 4   |
| 2.2 The general procedures for synthesis ortho-quinone methides .....      | 4   |
| 2.3 The procedure of synthesis Cat-1 .....                                 | 5   |
| 3 The optimization of reaction conditions.....                             | 6   |
| 4 The general procedure for the synthesis of 8-membered lactone .....      | 7   |
| 5 The epimerization experiments .....                                      | 9   |
| 6 Reaction mechanism and DFT calculations .....                            | 10  |
| 7 X-ray Crystallographic Data .....                                        | 30  |
| 8 The characterization of data .....                                       | 32  |
| 9 NMR spectra of 8-memebered lactone .....                                 | 56  |
| 10 HPLC spectra of 8-memebered lactone .....                               | 104 |

## 1. General Information

Chemicals and solvents were either purchased from commercial suppliers or purified by standard techniques. Analytical thin-layer chromatography (TLC) was performed on silicycle silica gel plates with F-254 indicator and compounds were visualized by irradiation with UV light. Flash chromatography was carried out utilizing silica gel 200-300 mesh.  $^1\text{H}$  NMR,  $^{13}\text{C}$  NMR spectra were recorded on a Bruker AM-400 or AM-600 spectrometer (400 MHz  $^1\text{H}$ , 100 MHz  $^{13}\text{C}$ , 600 MHz  $^1\text{H}$ , 150 MHz  $^{13}\text{C}$ ). The spectra were recorded in  $\text{CDCl}_3$  as the solvent at room temperature,  $^1\text{H}$  and  $^{13}\text{C}$  NMR chemical shifts are reported in ppm relative to either the residual solvent peak ( $^{13}\text{C}$ ) ( $\delta = 77.00$  ppm) or TMS ( $^1\text{H}$ ) ( $\delta = 0$  ppm) as an internal standard. Data for  $^1\text{H}$  NMR are reported as follows: chemical shift ( $\delta$  ppm), multiplicity (s = singlet, d = doublet, t = triplet, m = multiplet, dd = double doublet, br = broad), integration, coupling constant (Hz) and assignment. Data for  $^{13}\text{C}$  NMR are reported as chemical shift. HRMS were performed on Thermo Scientific LTQ-Orbitrap Elite-ETD MS with ESI. Enantiomeric excess values were determined by HPLC with a Daicel Chirapak IA/IC-3/IF-3/OD-H column on Agilent 1260 series with *i*-PrOH and *n*-hexane. Optical rotation was measured on the Perkin Elmer 341 polarimeter with  $[\alpha]_{\text{D}}$  values reported in degrees. Concentration (c) is in g/100 mL. The crystal measurement is performed on XtaLAB Synergy-DW. All the catalysts mentioned in this work are known compounds, Cat-7 was purchased from Daicel. Cat-1, Cat-4, Cat-5 were derived from quinine and hydrogenquinine, which were synthesized according to the methods in *J. Am. Chem. Soc.* **2008**, *130*, 14416. Cat-2 was derived from quinine, which was synthesized according to the methods in *Organic Letters* **2005**, *7*, 1967 and *Chem. Commun.*, **2005**, 4481. Cat-3 was derived from (*R, R*)-*N, N*-dimethyl-*trans*-diaminocyclohexane according to the methods in *J. Am. Chem. Soc.* **2003**, *125*, 12672. Cat-6 was derived from quinine and (*1R, 2S*)-1-Amino-2-indanol (*Chem. Eur.J.* **2017**, *23*, 6752). Cat-8 was derived from (*1R, 2R*)-1,2-diaminocyclohexane according to the methods in *Org. Lett.* **2016**, *18*, 260. Cat-9 was derived from *L*-Phenylalaninol according to the method in *Tetrahedron: Asymmetry*, **2013**, *24*, 953. Cat-10 was derived from (*1R, 2R*)-1,2-diphenyl-2-(piperidin-1-yl)ethan-1-amine according to the methods in *Eur. J. Org. Chem.*, **2013**, *22*, 4844. Cat-11 was derived from (*1R, 2R*)-diaminocyclohexane according to the method in *Chem. Commun.*, **2010**, *46*, 3004; Cat-12 was derived from (*1R, 2R*)-diaminocyclohexane according to the method in *Org. Lett.* **2010**, *12*, 2028.

## 2 General Procedures for the synthesis of substrates

### 2.1 The general procedures for synthesis cyclobutanone carbonxester 1

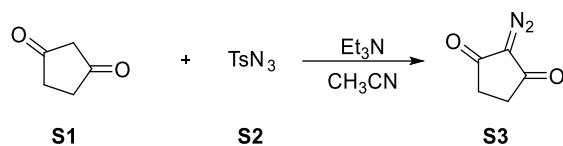

A 50 mL round-bottomed flask, protected from sunlight with aluminum foil, equipped with an adequate stirring bar was charged with cyclopentane-1,3-dione (**S3** 1.47 g, 15 mmol) and MeCN (5 mL). Tosyl azide (3.2 mL, 15 mmol (75 % wt in EtOAc)) and Et<sub>3</sub>N (2.30 mL, 16.5 mmol) were successively added and the mixture was stirred for 4 h at r.t. The mixture was concentrated under vacuum to give the crude product. Purification of this material by flash chromatography (neutral Al<sub>2</sub>O<sub>3</sub>, eluent: 4:6 EtOAc–PE) afforded 1.59 g (86%) of **S5** as a yellowish solid, which should be protected from light and stored at ca. –25 °C for next step<sup>1</sup>.

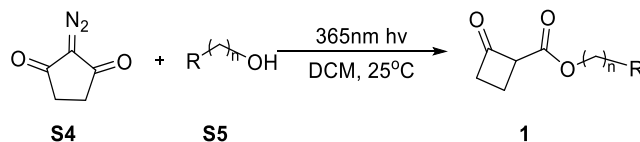

**S5** (2.4 mmol, 298 mg) and alcohol (amine) **S6** (2.5 mmol) were added in 10 mL DCM under argon atmosphere in 50 mL reaction tube and stirred under **photoreactor** (10 W, 365 nm) for about 8-20 h (monitored by TLC, iodine vapor). Then the solution was concentrated in vacuo, and the crude residue was purified by column chromatography on silica gel to give the compound **1**<sup>2</sup> as known compound.

### 2.2 The general procedures for synthesis ortho-quinone methides

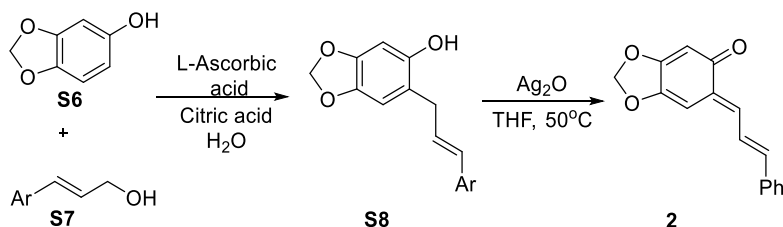

A suspension of sesame phenol **S6** (2.76 g, 20.0 mmol) and (E)-3-argioprop-2-en-1-ol **S7** (1 eq. 20 mmol) in 2% aqueous citric acid (100 mL) containing ascorbic acid (1.0 g, 5.6 mmol) was refluxed for 17 hours, then cooling to room temperature, the oily

<sup>1</sup> Presset M, Mailhol D, Coquerel Y, et al. *Synthesis*, 2011, 2011(16): 2549-2552.

<sup>2</sup> Zhang M M, Chen P, Xiong W, et al. *CCS Chemistry*, 2022, 4(8): 2620-2629.

product was crystallized. After filtration, the crude product was recrystallized from toluene and afforded **S8**, which was directly used in the next step. The solid **S8** (1g) was dissolved in THF (50 mL), followed by addition of silver oxide (1.5 g), and stirred for 12 h at room temperature (RT). The solution was filtered, the residue was washed with dichloromethane until the liquid flowing down became colorless. Then the solution was concentrated to 10 mL, and red crystals were collected<sup>3</sup> as known compound.

### 2.3 The procedure of synthesis Cat-1

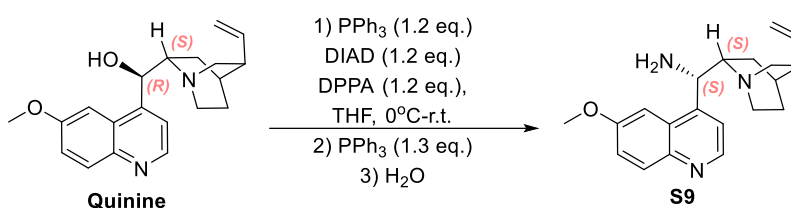

**Quinine** (3.26 g, 10.0 mmol) and **triphenylphosphine** (3.15 g, 12.0 mmol) were dissolved in 50 mL of dry THF and the solution was cooled to 0 °C. **Diisopropyl azodicarboxylate** (2.43 g, 12.0 mmol) was added all at once. Then solution of **diphenyl phosphoryl azide** (3.30 g, 12.0 mmol) in 20 mL of dry THF was added dropwise at 0 °C. The mixture was allowed to warm to room temperature. After being stirred for 12 h, the solution was heated to 50 °C for 2 h. Then **triphenylphosphine** (3.41 g, 13.0 mmol) was added and heating was maintained until the gas evolution has ceased (2 h). The solution was cooled to room temperature, and 1 mL of water was added and the solution was stirred for 3 h. Solvents were removed in vacuo and the residue was dissolved in CH<sub>2</sub>Cl<sub>2</sub> and 10% hydrochloric acid (1:1, 100 mL). The aqueous phase was washed with CH<sub>2</sub>Cl<sub>2</sub> (4 × 50 mL). Then the aqueous phase was made alkaline with excess cc. aqueous ammonia and was washed with CH<sub>2</sub>Cl<sub>2</sub> (4 × 50 mL). The combined organic phases was dried over Na<sub>2</sub>SO<sub>4</sub> and concentrated. The residue was purified by column chromatography on silica gel (EtOAc/EtOH/Et<sub>3</sub>N = 70/30/1 as eluant) affording the **S9** as a yellowish viscous oil. (65-70% yield).

<sup>3</sup> Yu X, Lan W, Li J, et al.. RSC advances, 2020, 10(72): 44437-44441.

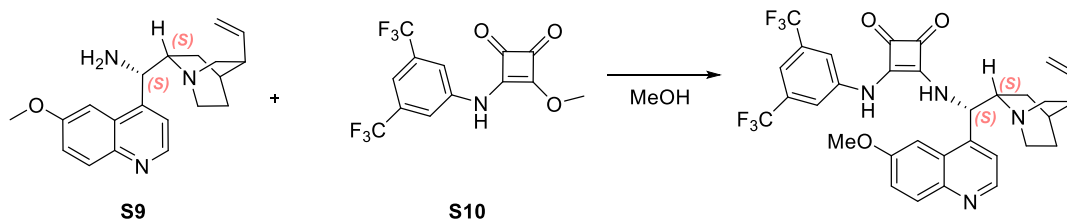

To a solution of **S10** (372 mg, 1.1 mmol) in MeOH (10 mL) was added a solution of **quinine amine S9** (323 mg, 1 mmol) in MeOH (5 mL). After 24 h, The residue was concentrated and purified by column chromatography on silica gel with EtOH to afford squaramide **Cat-1** (0.49 g, 71 %) as a yellow solid.

### 3 The optimization of reaction conditions

**Table S1** The screen of different bifunctional catalyst:

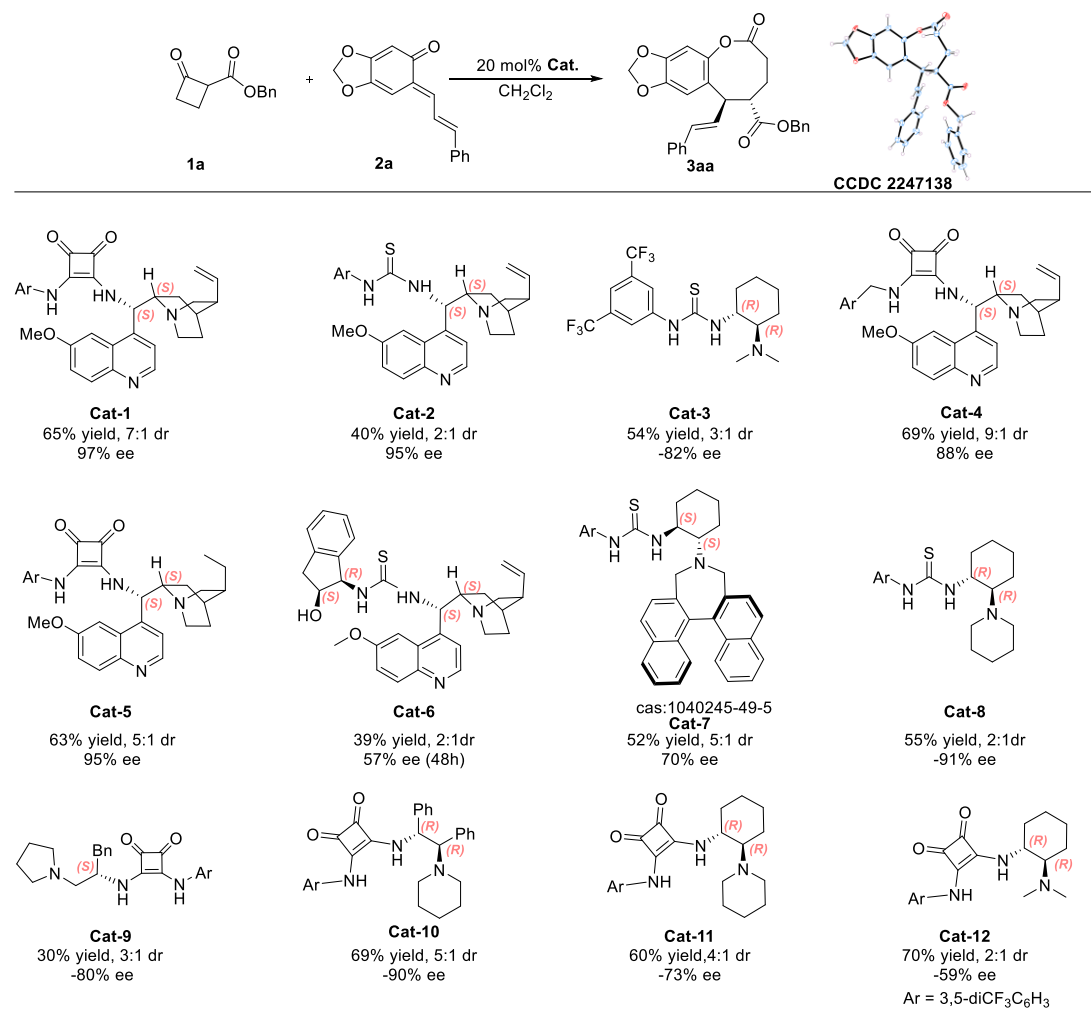

**Table S2** The optimization of others paraments

| Entry <sup>a</sup> | cat/ mol% | solvent            | t/ °C | dr <sup>b</sup> | Yield/% <sup>c</sup> | Ee/% <sup>d</sup> |
|--------------------|-----------|--------------------|-------|-----------------|----------------------|-------------------|
| 1                  | 20        | DCM                | 25    | 7:1             | 65                   | 97                |
| 2                  | 20        | DCE                | 25    | 7:1             | 66                   | 95                |
| 3                  | 20        | Toluene            | 25    | 7:1             | 60                   | 90                |
| 4                  | 20        | CHCl <sub>3</sub>  | 25    | 5:1             | 69                   | 89                |
| 5                  | 20        | CH <sub>3</sub> CN | 25    | 7:1             | 63                   | 75                |
| 6                  | 20        | THF                | 25    | 4:1             | 56                   | 87                |
| 7                  | 15        | DCM                | 25    | 7:1             | 66                   | 97                |
| 8                  | 10        | DCM                | 25    | 8:1             | 66                   | 98                |
| 9                  | 5         | DCM                | 25    | 8:1             | 59                   | 96                |
| 10                 | 10        | DCM                | 0     | 8:1             | 69                   | 97                |
| 11                 | 10        | DCM                | -10   | 8:1             | 61                   | 96                |
| 12 <sup>e</sup>    | 10        | DCM                | 25    | 8:1             | 70                   | 98                |
| 13 <sup>f</sup>    | 10        | DCM                | 25    | 7:1             | 72                   | 97                |
| 14 <sup>g</sup>    | 10        | DCM                | 25    | 8:1             | 75                   | 98                |
| 15 <sup>h</sup>    | 10        | DCM                | 25    | 8:1             | 78                   | 98                |
| 16 <sup>i</sup>    | 10        | DCM                | 25    | 7:1             | 79                   | 98                |

[a] Unless others specified, the reactions were performed with 0.1 mmol **1a**, 0.1 mmol **2a**, catalyst (10 mol%) in 1 mL solvent at 20°C for 4 hours (determined by the disappear of **2a**). [b] Isolated yield. [c] Determined by chiral HPLC. [d] Determined by the curde <sup>1</sup>HNMR. [e] 0.11 mmol **1a**. [f] 0.11 mmol **2a**. [g] 0.12 mmol **1a**. [h] 0.13 mmol **1a**. [i] 0.15 mmol **2a**

#### 4 The general procedure for the synthesis of 8-membered lactone

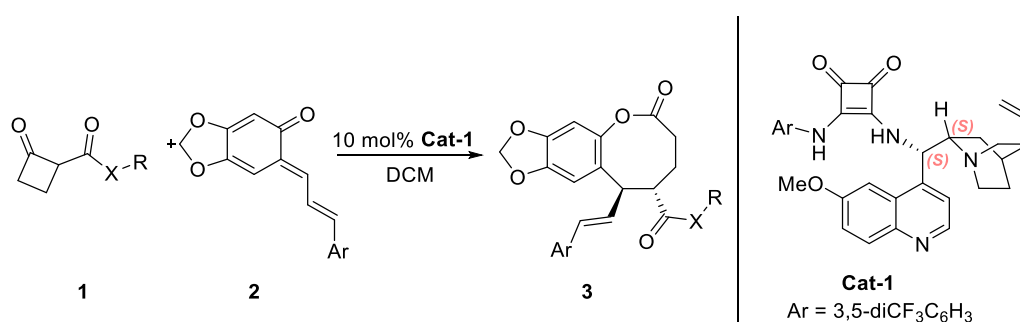

To a 10 ml vessel were successively added **Cat-1** (0.01 mmol), **cyclobutanone carbonxester 1** (0.13 mmol), **ortho-quinone methides 2** (0.10 mmol), then 1 mL dry DCM (CH<sub>2</sub>Cl<sub>2</sub>) added by syringe and the reaction mixture was stirred at 20 °C for approximately 2-4 h and monitored by thin layer chromatography, when TLC analysis showed **ortho-quinone methides 2** was mainly consumed, the solvent was evaporated under reduced pressure and the residue was purified by flash column chromatography

on silica gel (petroleum ether/ethyl acetate = 10:1-5:1-4:1) to give the corresponding enantioenriched **8-membered lactone** as a colourless oil or solid.

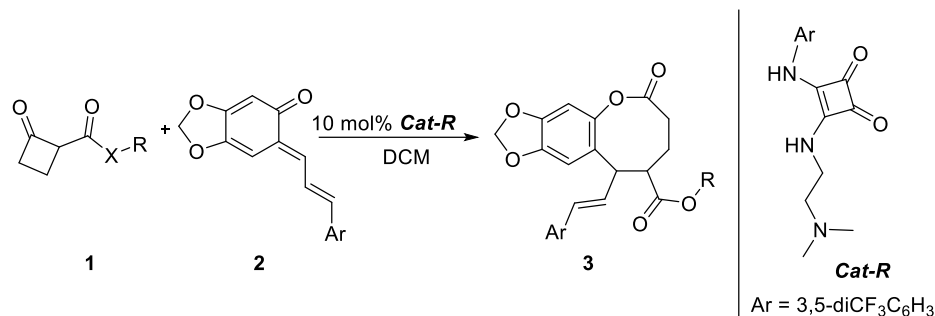

To a 10 ml vessel were successively added **Cat-R** (0.02 mmol), **cyclobutanone carbonxester 1** (0.13 mmol), **ortho-quinone methides 2** (0.10 mmol), then 1 mL dry DCM(CH<sub>2</sub>Cl<sub>2</sub>) added by syringe and the reaction mixture was stirred at 20 °C for approximately 24 h and monitored by thin layer chromatography, when TLC analysis showed **ortho-quinone methides 2** was mainly consumed, the solvent was evaporated under reduced pressure and the residue was purified by flash column chromatography on silica gel (petroleum ether/ethyl acetate = 10:1) to give the corresponding racemic **8-membered lactone** as a colourless oil or solid.

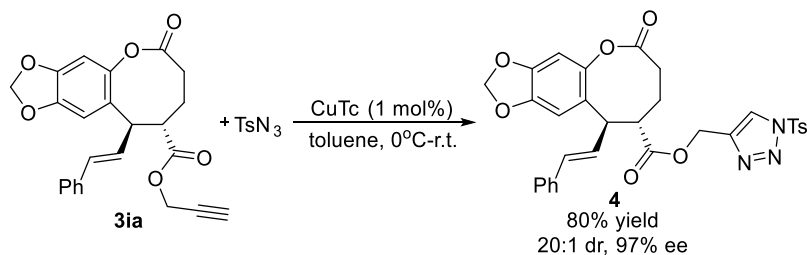

A toluene solution of **3ia** (55.0 mg, 0.1 mmol, 1 mL toluene) was transferred into a 10 mL sealed tube, then **CuTc** (CAS: 68986-76-5) (2 mg, 0.005 mmol), **TsN<sub>3</sub>** (20 mg, 0.1 mmol) were added at 0°C under Ar. This mixture solution was stirred at 0 °C for 1 hour and 10 hours at 20°C. After the completion of the reaction which was indicated by TLC (**3ia** was totally consumed), the reaction mixture was transferred into a 10 mL flask and added a small spoon silica gel, that the solvent was evaporated under reduced pressure and the residue was purified by flash column chromatography on silica gel (petroleum ether/ethyl acetate = 5:1) to give the **enantioenriched product 4** as a colorless oil (49



mg, 80% yield). The **racemic product 4** was synthesized from the **racemic 3ia** by the same procedure.

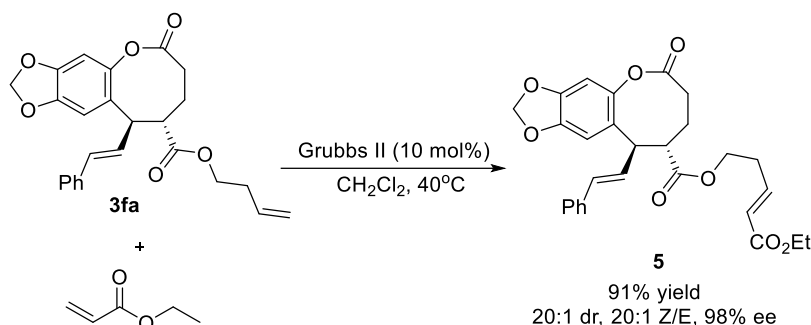

A DCM solution of **3fa** (42.0 mg, 0.1 mmol, 1 mL DCM) was transferred into a 10 mL sealed tube, then **Grubbs II catalyst** (13 mg, 0.01 mmol), **Ethyl Acrylate** (108  $\mu\text{L}$ ) were added under Ar. The mixture solution was stirred at 40  $^\circ\text{C}$  (oil bath) for 12 hours, when TLC analysis showed the **3fa** was consumed. The stirring was stopped and cooled to room temperature, the reaction mixture was transferred into a 10 mL flask and added a small spoon silica gel, that the solvent was evaporated under reduced pressure and the residue was purified by flash column chromatography on silica gel (petroleum ether/ethyl acetate = 4:1) to give the **enantioenriched product 5** as a colorless oil (48 mg, 91% yield). The **racemic product 5** was synthesized from the **racemic 3fa** by the same procedure.

## 5 The epimerization experiments

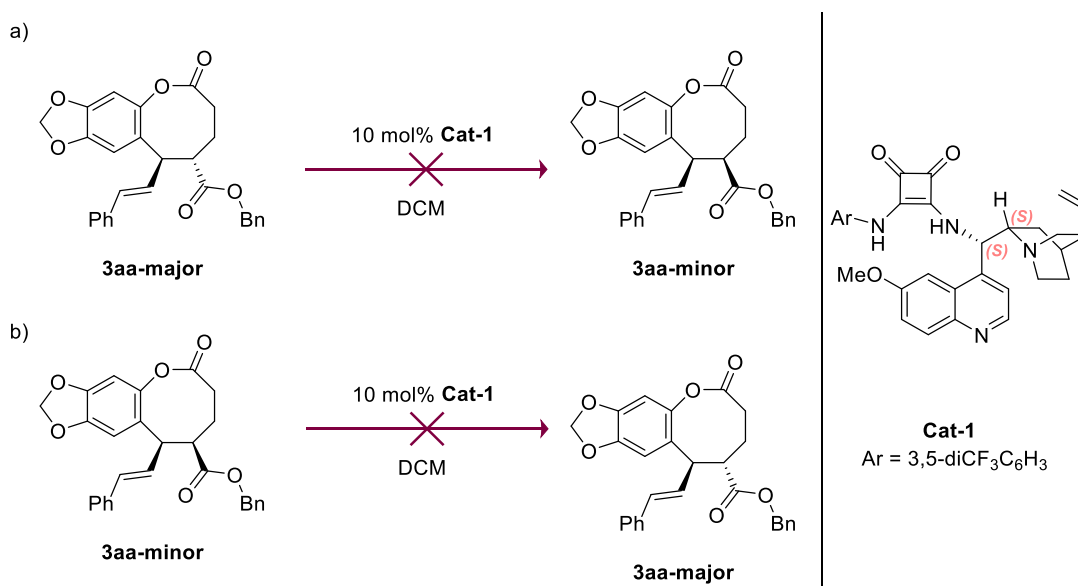

**Fig. S1** Epimerization experiments

In a 10 mL reaction tube, 0.1 mmol **3aa-major** and 0.01 mmol **Cat-1** were added

with 1 mL DCM, stirred 72 hours at 25 °C, after that we couldn't observe any epimerization product (**3aa-minor**). Respectively, when the **3aa-minor** was used as starting material, any **3aa-major** was detected (Fig. S1). **These results implied the diastereoselectivity was not originated from the process of epimerization.**

## 6 Reaction mechanism and DFT calculations

Based on our experiments and previous reports, a proposed mechanism was outlined as below Fig. S2: the quinine-squaramide (Cat-1) as a bifunctional catalyst synergistic activated ortho-quinone methides **2** and cyclobutone carbonester **1**, the racemic cyclobutone carbonester **1** was transformed into pre-chiral enolate via a deprotonation with the help of catalyst-1, which underwent a stereospecific Michael addition with quinone methides **2** and afforded the proposed **Int-1**, then the electron-rich oxygen anion on **Int-1** attacked the carbonyl of cyclobutone and yielded **Int-2**, next the **Int-2** underwent fragmentation reaction which driven by the tension release of cyclobutanone and produced the enolate **Int-3**, at last a selective protonation of **Int-3** afforded the 8-membered lactone product **3**. In order to get some insights to diastereoselectivity, some DFT-calculations were conducted. First, the energy barriers (Cat-4 showed superior diastereoselectivity than Cat-1, so we calculated the energy barrier that Cat-4 mediated for the formation TS1 and TS2). of protonation of **Int-3** were calculated, the results showed the formation of trans-lactone from **Int-3** need to overcome 2.3 kcal energy barrier (TS1), respectively the energy barrier of cis-product from **Int-3** was 15.4 kcal (TS2). Moreover, the calculated Gibbs free energy of product **3aa** indicated that the **trans-lactone-3aa** was lower 6.9 kcal/mol than the **cis-product-3aa**, it implied the trans-product as thermodynamic product is more stable than cis-product. These two calculated results implied the formation of trans-lactone was favorable process in our protocol, it was consistent with our experiments results that the trans-lactones were obtained as the major products.

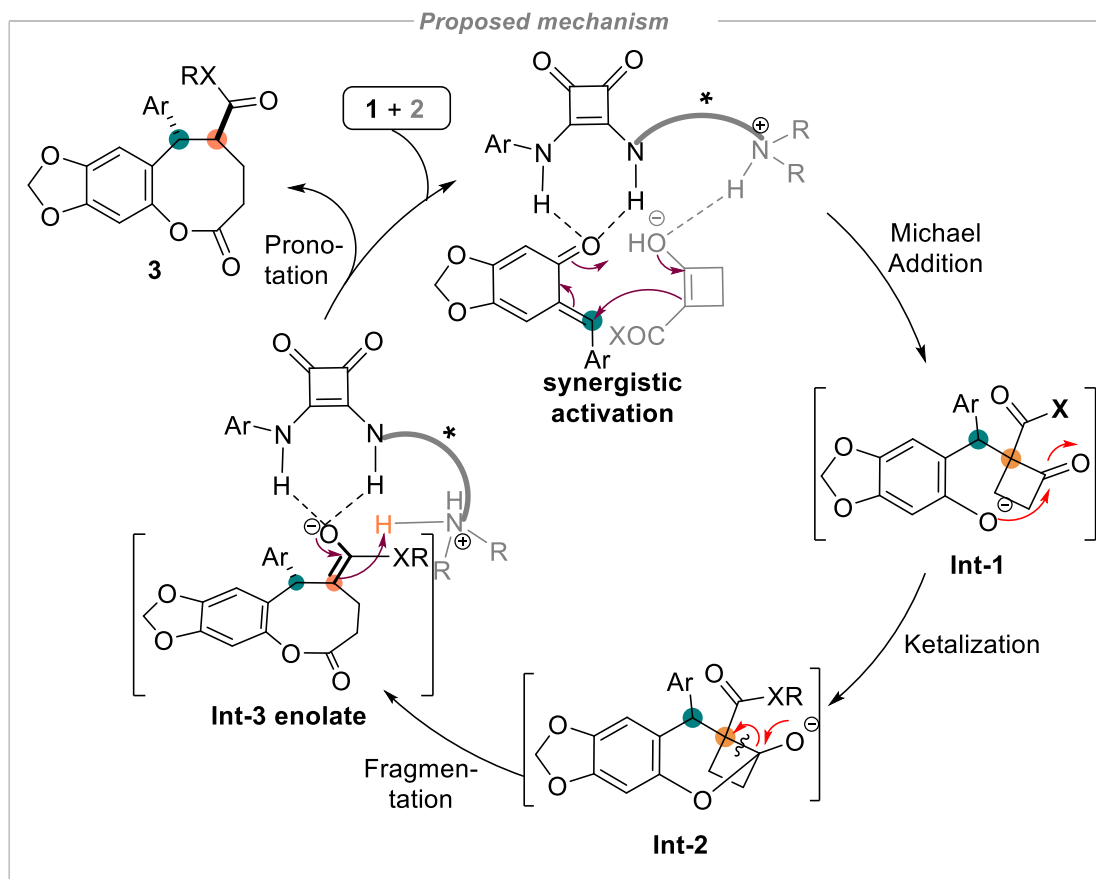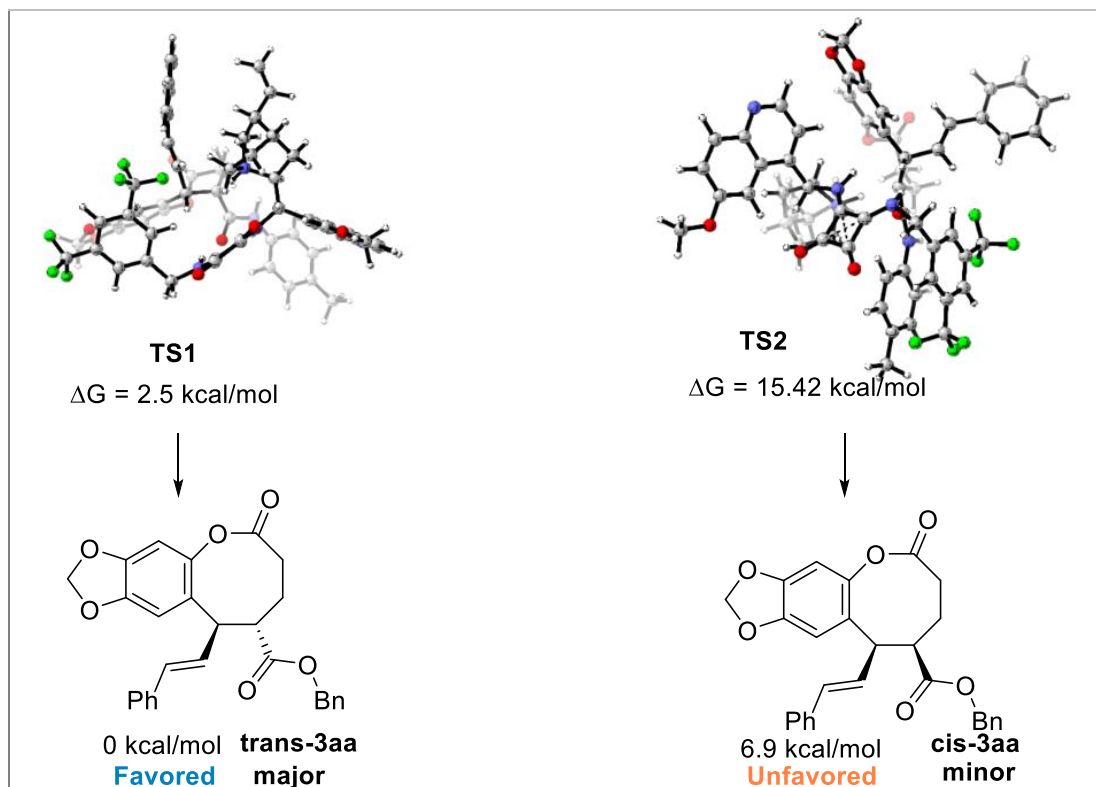

**Figure S2** Proposed mechanism and DFT-calculations

DFT calculations<sup>1</sup> were performed with the Gaussian16<sup>2</sup> software package. All geometries were optimized using B3LYP/6-31G (d) with GD3<sup>3</sup>. Vibration frequencies were computed at the same level of theory to obtain thermal corrections. Single point energies were calculated by using M062X<sup>4,5</sup>-D3/6-311G(2d,p), with inclusion of the IEFPCM<sup>6</sup> implicit solvent model (solvent =Dichloromethane). All structures were generated using GaussView5.0.9 and CYLview. The Cartesian coordinates were listed below.

**Enolate intermediate** for the formation of trans-3aa

# M062X/6-311g(2d,p) EmpiricalDispersion=GD3 scrf=(pcm,solvent=Dichloromethane)

```

0 1
C          1.06946500   -3.10179300   -2.51219500
C          0.79440200   -1.63729800   -2.41901900
C          1.82496300   -1.44319500   -1.48679300
C          2.11355100   -2.89245200   -1.40131200
O          0.59064200   -4.01898700   -3.14952200
O          2.78722200   -3.58337000   -0.64580400
N         -0.16898700   -0.85386500   -2.92724900
N          2.26971200   -0.37703600   -0.79926400
C          3.25588000   -0.54326300    0.25718900
C          4.62824100    0.01656100   -0.11855300
C          2.82803100    0.06709000    1.62036900
C          5.79131300   -0.81230700   -0.22693400
C          7.02679900   -0.14999700   -0.55577400
N          7.12627600    1.18906700   -0.80058300
C          6.02337500    1.90339700   -0.72050300
C          4.76366300    1.36352000   -0.36925200
C          5.79932700   -2.21402500   -0.02920500
C          6.97885000   -2.93515400   -0.12072300
C          8.20181200   -2.28064000   -0.42213700
C          8.21176400   -0.92170000   -0.63930400
N          1.34437300   -0.07309400    1.93889300
C          0.86720000   -1.49724200    1.81358700
C          1.83883800   -2.40972700    2.59683200
C          2.66177000   -1.53289100    3.56368400
C          3.61636400   -0.61167100    2.77530100
C          1.67045700   -0.63629900    4.35562100
C          1.12307000    0.40213700    3.35627500
C          2.28639000   -0.04794800    5.60097500
C          2.35025600    1.23356800    5.96434400
H         -0.27147700    0.07180200   -2.49617700
H          1.88935800    0.53277200   -1.07122400

```

|   |             |             |             |
|---|-------------|-------------|-------------|
| C | -1.32811400 | -1.46287500 | -3.57129000 |
| C | -2.36916700 | -2.00503100 | -2.59962700 |
| C | -2.01373700 | -2.43719300 | -1.32161100 |
| C | -2.97324700 | -2.94654800 | -0.44684100 |
| C | -4.31000500 | -3.03128100 | -0.82851400 |
| C | -4.66821400 | -2.60308600 | -2.10843600 |
| C | -3.70976000 | -2.09974600 | -2.98577600 |
| O | 6.87198800  | -4.27652200 | 0.09287500  |
| C | 8.02165400  | -5.09299100 | -0.07380000 |
| C | -6.11612000 | -2.69969000 | -2.51512800 |
| F | -6.92588900 | -2.13236000 | -1.59546200 |
| F | -6.36383100 | -2.10677500 | -3.70309600 |
| F | -6.50078300 | -3.99394400 | -2.62655000 |
| C | -2.54841200 | -3.30065200 | 0.94928100  |
| F | -1.29249500 | -3.80761000 | 0.98881900  |
| F | -2.52069900 | -2.19015400 | 1.74708100  |
| F | -3.37276200 | -4.18376700 | 1.53849600  |
| H | 3.34098100  | -1.61731400 | 0.39586300  |
| H | 2.98880600  | 1.14747100  | 1.59739200  |
| H | 6.10167200  | 2.96750900  | -0.93540700 |
| H | 3.91103300  | 2.02874000  | -0.31609300 |
| H | 4.88733900  | -2.77691100 | 0.13501800  |
| H | 9.12621400  | -2.84175600 | -0.49413900 |
| H | 9.13090200  | -0.39905300 | -0.88449600 |
| H | 0.81371000  | -1.74822200 | 0.75821400  |
| H | -0.14772800 | -1.52681200 | 2.21132300  |
| H | 2.48596800  | -2.95638200 | 1.90440200  |
| H | 3.23526300  | -2.16307800 | 4.25063000  |
| H | 4.45053600  | -1.18506200 | 2.36111300  |
| H | 4.04437300  | 0.13796000  | 3.44815700  |
| H | 0.84022300  | -1.27908000 | 4.68432800  |
| H | 1.26362200  | -3.15622300 | 3.15395400  |
| H | 1.63859400  | 1.36002100  | 3.43266200  |
| H | 0.05567000  | 0.58770000  | 3.47488600  |
| H | 2.71120800  | -0.79846100 | 6.26898700  |
| H | 1.93301800  | 2.04421600  | 5.37278900  |
| H | 2.81747300  | 1.52471500  | 6.90048200  |
| H | -1.78756100 | -0.71732600 | -4.22708400 |
| H | -0.97097100 | -2.28806500 | -4.19657500 |
| H | -0.98795000 | -2.37354100 | -0.98619600 |
| H | -5.05924700 | -3.41146300 | -0.14325600 |
| H | -4.02133900 | -1.74681700 | -3.96261500 |
| H | 8.42849800  | -5.01805100 | -1.09112800 |
| H | 8.80888600  | -4.84146300 | 0.65019300  |

|   |             |             |             |
|---|-------------|-------------|-------------|
| H | 7.68579100  | -6.11617200 | 0.10371700  |
| O | -3.24298500 | 4.39197700  | 1.45779300  |
| C | -4.70876900 | 2.43962500  | -2.28958600 |
| C | -4.58416300 | 1.12158100  | -1.85761200 |
| C | -3.60948200 | 0.73127300  | -0.97016500 |
| C | -2.70505400 | 1.70091900  | -0.48163100 |
| C | -2.87884600 | 3.02000300  | -0.90728900 |
| C | -3.86767100 | 3.42499100  | -1.82018300 |
| O | -2.01131200 | 3.99938000  | -0.42345400 |
| C | -1.62082700 | 1.19185100  | 0.49153100  |
| C | -0.33529600 | 2.02432600  | 0.71796800  |
| C | -2.22859200 | 0.78310900  | 1.81770100  |
| C | -3.33425100 | 1.29363300  | 2.37600900  |
| C | -0.30307600 | 3.06593600  | 1.83532300  |
| C | -0.82401700 | 4.51797200  | 1.51656500  |
| C | -2.17587000 | 4.35765100  | 0.89441900  |
| C | 0.44987500  | 2.22175400  | -0.44924600 |
| O | 0.36598900  | 1.52192900  | -1.50426000 |
| N | 1.47658800  | 3.18019000  | -0.38539300 |
| C | 2.37750000  | 3.61438600  | -1.37338500 |
| C | 2.46887200  | 3.07911500  | -2.66991800 |
| C | 3.45994700  | 3.53420500  | -3.53786900 |
| C | 4.38357200  | 4.52127700  | -3.17510600 |
| C | 4.26338400  | 5.06753900  | -1.89124400 |
| C | 3.28429400  | 4.62615400  | -1.00648000 |
| C | 5.48375600  | 4.95383800  | -4.11467900 |
| H | -3.54375400 | -0.29335800 | -0.62943700 |
| H | -3.95127000 | 4.46376000  | -2.11424200 |
| H | -1.27598400 | 0.26167900  | 0.01389400  |
| H | -1.65573900 | 0.04787500  | 2.37759600  |
| H | -3.87634600 | 2.06982100  | 1.84120800  |
| H | 0.71410600  | 3.18454800  | 2.24205700  |
| H | -0.90788200 | 2.70273400  | 2.67142000  |
| H | -0.15988100 | 5.02676200  | 0.81174500  |
| H | -0.90003900 | 5.10048200  | 2.43808000  |
| H | 1.49537700  | 3.74397000  | 0.44992100  |
| H | 1.76834300  | 2.31845600  | -2.97956100 |
| H | 3.51373300  | 3.09829300  | -4.53322700 |
| H | 4.94839000  | 5.85075800  | -1.57340400 |
| H | 3.22610000  | 5.06459500  | -0.01107500 |
| H | 5.16160000  | 4.90201600  | -5.16058600 |
| H | 5.80544900  | 5.98138200  | -3.91197500 |
| H | 6.36794900  | 4.30956500  | -4.01536400 |
| H | 0.75235500  | 0.63597600  | 1.32802200  |

|   |             |             |             |
|---|-------------|-------------|-------------|
| C | -6.40321700 | 1.26568900  | -3.14486000 |
| H | -7.33643800 | 1.36460300  | -2.57147100 |
| O | -5.73741900 | 2.53595300  | -3.19821600 |
| O | -5.53290200 | 0.34237100  | -2.48343300 |
| H | -6.59980900 | 0.91115800  | -4.15967400 |
| C | -3.85157200 | 0.95304800  | 3.71000800  |
| C | -3.63756000 | -0.29815300 | 4.31681100  |
| C | -4.58096900 | 1.92350500  | 4.41948600  |
| C | -4.11350600 | -0.55547800 | 5.60099800  |
| H | -3.12990600 | -1.08183400 | 3.76321500  |
| C | -5.05460800 | 1.66498700  | 5.70478400  |
| H | -4.75489100 | 2.89178200  | 3.95591300  |
| C | -4.81959700 | 0.42513300  | 6.30339700  |
| H | -3.94721600 | -1.53156100 | 6.05035100  |
| H | -5.60996100 | 2.43160500  | 6.23908400  |
| H | -5.19405300 | 0.21943600  | 7.30266100  |

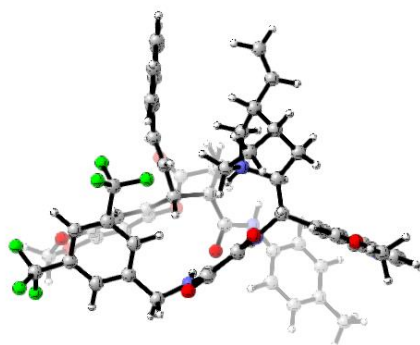

**TS1** for the formation of **trans-3aa**

# M062X/6-311g(2d,p) EmpiricalDispersion=GD3 scrf=(pcm,solvent=Dichloromethane)

|     |             |             |             |
|-----|-------------|-------------|-------------|
| 0 1 |             |             |             |
| C   | 0.78459600  | -0.87370500 | 3.85359500  |
| C   | 0.57930700  | -1.46622300 | 2.50023000  |
| C   | 1.65303800  | -0.74350600 | 1.95609800  |
| C   | 1.89967900  | -0.02100300 | 3.22562800  |
| O   | 0.23606900  | -1.00399800 | 4.93082600  |
| O   | 2.61100300  | 0.92273300  | 3.54690400  |
| N   | -0.34761000 | -2.29315200 | 1.99732900  |
| N   | 2.18045400  | -0.63582000 | 0.72345400  |
| C   | 3.21938400  | 0.34494700  | 0.43070200  |
| C   | 4.55920500  | -0.31879300 | 0.11769800  |
| C   | 2.84765700  | 1.33453600  | -0.70971900 |
| C   | 5.68513200  | -0.21976200 | 0.99848600  |

|   |             |             |             |
|---|-------------|-------------|-------------|
| C | 6.89015100  | -0.89066700 | 0.58480000  |
| N | 6.99189100  | -1.62761000 | -0.55982900 |
| C | 5.92289600  | -1.71176100 | -1.32278600 |
| C | 4.69905600  | -1.06398700 | -1.03174600 |
| C | 5.68389900  | 0.48802800  | 2.22405000  |
| C | 6.82839500  | 0.55798500  | 3.00217300  |
| C | 8.02306600  | -0.08554300 | 2.58593300  |
| C | 8.03963300  | -0.79489800 | 1.40669100  |
| N | 1.39591000  | 1.76039500  | -0.70585200 |
| C | 0.99005800  | 2.31544700  | 0.63428600  |
| C | 2.05157000  | 3.33319400  | 1.11650500  |
| C | 2.86378500  | 3.79336200  | -0.11071800 |
| C | 3.72924700  | 2.61489100  | -0.61211100 |
| C | 1.83788400  | 4.18797000  | -1.20452500 |
| C | 1.23030600  | 2.86189600  | -1.72324100 |
| C | 2.38795300  | 4.99725000  | -2.34678100 |
| C | 1.77160100  | 6.05676800  | -2.87199900 |
| H | -0.39792800 | -2.35514900 | 0.97502700  |
| H | 1.87127300  | -1.30865800 | 0.02744900  |
| C | -1.51105700 | -2.66942400 | 2.79159800  |
| C | -2.65467400 | -1.66540400 | 2.74522900  |
| C | -2.40851800 | -0.29320300 | 2.62973400  |
| C | -3.46355400 | 0.61477400  | 2.62719700  |
| C | -4.78392900 | 0.17930400  | 2.76027100  |
| C | -5.03004400 | -1.18527300 | 2.87889200  |
| C | -3.97534900 | -2.10069500 | 2.86407000  |
| O | 6.71618400  | 1.26825900  | 4.15909400  |
| C | 7.82508000  | 1.32137100  | 5.04414400  |
| C | -6.43996100 | -1.67595100 | 3.07797800  |
| F | -6.74939600 | -1.73874900 | 4.39461200  |
| F | -7.34889200 | -0.87029300 | 2.49582700  |
| F | -6.61589800 | -2.92540500 | 2.58035900  |
| C | -3.21191000 | 2.08323300  | 2.42517200  |
| F | -1.90043800 | 2.35599700  | 2.17803700  |
| F | -3.91229300 | 2.55228400  | 1.36472900  |
| F | -3.57695100 | 2.81767200  | 3.49399900  |
| H | 3.31911700  | 0.92668000  | 1.34209300  |
| H | 2.97803900  | 0.83609400  | -1.67339400 |
| H | 6.00075300  | -2.31731300 | -2.22377900 |
| H | 3.87357800  | -1.18324100 | -1.72220600 |
| H | 4.78737900  | 0.94976100  | 2.62264600  |
| H | 8.91996700  | -0.03219200 | 3.19196300  |
| H | 8.93658900  | -1.30590400 | 1.07137500  |
| H | 0.84438800  | 1.49371800  | 1.32966400  |



|   |             |             |             |
|---|-------------|-------------|-------------|
| H | 0.02639200  | 2.80066000  | 0.48812400  |
| H | 2.69198800  | 2.88806000  | 1.88327400  |
| H | 3.50124600  | 4.64519000  | 0.14441200  |
| H | 4.55988200  | 2.43721000  | 0.07830300  |
| H | 4.17709700  | 2.84889800  | -1.58314200 |
| H | 1.03725800  | 4.77287800  | -0.73513200 |
| H | 1.54609800  | 4.18676600  | 1.58030600  |
| H | 1.72617700  | 2.53130900  | -2.63806000 |
| H | 0.16600100  | 2.96403100  | -1.93260400 |
| H | 3.33112000  | 4.65457400  | -2.77574200 |
| H | 0.81732700  | 6.41006600  | -2.48533000 |
| H | 2.18997600  | 6.60141700  | -3.71405100 |
| H | -1.86161500 | -3.64764800 | 2.44809600  |
| H | -1.18524300 | -2.77620400 | 3.83158300  |
| H | -1.39758000 | 0.07428200  | 2.51808900  |
| H | -5.60597100 | 0.88577900  | 2.73637200  |
| H | -4.19350100 | -3.16211600 | 2.93301500  |
| H | 8.12242000  | 0.31982800  | 5.38292900  |
| H | 8.68990200  | 1.81948000  | 4.58469200  |
| H | 7.48991300  | 1.90564400  | 5.90289300  |
| O | -2.91148500 | -0.01635700 | -4.75841300 |
| C | -5.10013000 | -2.50102100 | -1.86965500 |
| C | -4.96992700 | -1.63002200 | -0.79030500 |
| C | -3.86248300 | -0.83433200 | -0.62192800 |
| C | -2.82158300 | -0.89861200 | -1.57723400 |
| C | -3.00394500 | -1.75138900 | -2.66547400 |
| C | -4.12950200 | -2.57291800 | -2.84459200 |
| O | -2.00902300 | -1.79408100 | -3.64430500 |
| C | -1.57101600 | -0.04732600 | -1.25951700 |
| C | -0.22293100 | -0.20084700 | -2.02666000 |
| C | -1.90081800 | 1.42645400  | -1.14960100 |
| C | -2.53262700 | 2.18420700  | -2.05864000 |
| C | -0.03855500 | 0.42402100  | -3.41713900 |
| C | -0.51876400 | -0.34939100 | -4.69718800 |
| C | -1.95345200 | -0.68440900 | -4.45209000 |
| C | 0.43781300  | -1.45757400 | -1.76018000 |
| O | 0.23412000  | -2.16993900 | -0.74196600 |
| N | 1.46786500  | -1.83511500 | -2.62488800 |
| C | 2.32979600  | -2.94868700 | -2.58467200 |
| C | 2.39413600  | -3.87724900 | -1.53304700 |
| C | 3.35555000  | -4.88656300 | -1.56137900 |
| C | 4.27299200  | -5.02194700 | -2.60911600 |
| C | 4.17817500  | -4.10716900 | -3.66546200 |
| C | 3.22861100  | -3.09043000 | -3.65695300 |

|   |             |             |             |
|---|-------------|-------------|-------------|
| C | 5.34329600  | -6.08672100 | -2.58560900 |
| H | -3.79443100 | -0.15287000 | 0.21425400  |
| H | -4.21393800 | -3.20707400 | -3.71821400 |
| H | -1.31295600 | -0.37149400 | -0.24397400 |
| H | -1.47108400 | 1.91361600  | -0.28233600 |
| H | -2.96429900 | 1.70906900  | -2.93899800 |
| H | 1.02208600  | 0.66420400  | -3.58622800 |
| H | -0.55231900 | 1.38816200  | -3.43552800 |
| H | 0.05176200  | -1.26932600 | -4.85249300 |
| H | -0.42434800 | 0.29545500  | -5.57434900 |
| H | 1.56666400  | -1.28154400 | -3.46072100 |
| H | 1.69621500  | -3.80280100 | -0.71308700 |
| H | 3.39096100  | -5.58903800 | -0.73156600 |
| H | 4.85965300  | -4.18732400 | -4.50958200 |
| H | 3.18725400  | -2.38988400 | -4.48992700 |
| H | 6.24393600  | -5.73094300 | -2.06723700 |
| H | 5.00239000  | -6.98691500 | -2.06263900 |
| H | 5.64372800  | -6.37820700 | -3.59806400 |
| H | 0.71060900  | 0.84722000  | -1.13066200 |
| C | -2.54049700 | 3.65708600  | -2.03705800 |
| C | -2.68161700 | 4.34905500  | -3.25301500 |
| C | -2.30615600 | 4.41079100  | -0.86914500 |
| C | -2.55278300 | 5.73667800  | -3.31159800 |
| H | -2.87300900 | 3.78330800  | -4.16192800 |
| C | -2.17783000 | 5.79668700  | -0.92881300 |
| H | -2.25676700 | 3.91163800  | 0.09242700  |
| C | -2.29084100 | 6.46781300  | -2.15124100 |
| H | -2.65660000 | 6.24696200  | -4.26558500 |
| H | -2.00521200 | 6.35861400  | -0.01425800 |
| H | -2.19509800 | 7.54942800  | -2.19350800 |
| O | -6.09791500 | -1.70090000 | -0.00340000 |
| O | -6.30397200 | -3.15899800 | -1.79430600 |
| C | -6.83754100 | -2.81982300 | -0.50526700 |
| H | -6.71834000 | -3.67031700 | 0.17915700  |
| H | -7.88919800 | -2.54117200 | -0.60859300 |

**Enolate intermediate** for the formation of cis-3aa

# M062X/6-311g(2d,p) EmpiricalDispersion=GD3 scrf=(pcm,solvent=Dichloromethane)

0 1

|   |             |             |             |
|---|-------------|-------------|-------------|
| C | 0.27482000  | -3.31240000 | -2.87184500 |
| C | -0.04218700 | -1.87026500 | -2.67680200 |
| C | 1.18709700  | -1.61751200 | -2.05565400 |
| C | 1.58971500  | -3.03802500 | -2.10442200 |

|   |             |             |             |
|---|-------------|-------------|-------------|
| O | -0.31183100 | -4.26544800 | -3.34993300 |
| O | 2.49432000  | -3.67823500 | -1.58689500 |
| N | -1.11386000 | -1.08301800 | -2.89039500 |
| N | 1.74440600  | -0.50496300 | -1.53968400 |
| C | 2.90976100  | -0.58030100 | -0.65642900 |
| C | 4.12388200  | 0.13435500  | -1.23482100 |
| C | 2.52688200  | 0.01637200  | 0.72197100  |
| C | 5.43138600  | -0.44909500 | -1.18596400 |
| C | 6.52103200  | 0.35664200  | -1.66564000 |
| N | 6.35853500  | 1.60448500  | -2.19447500 |
| C | 5.13075200  | 2.07433400  | -2.27100900 |
| C | 3.98982800  | 1.38257300  | -1.79652900 |
| C | 5.70860100  | -1.74987100 | -0.70087000 |
| C | 7.00654100  | -2.23119000 | -0.65464000 |
| C | 8.08619700  | -1.42446300 | -1.10074900 |
| C | 7.83633300  | -0.16588100 | -1.59868400 |
| N | 1.34776400  | -0.74318100 | 1.30933000  |
| C | 1.66912600  | -2.19486000 | 1.55813800  |
| C | 2.97077800  | -2.27637200 | 2.38824400  |
| C | 3.28988300  | -0.87974200 | 2.95671300  |
| C | 3.66133100  | 0.04164000  | 1.77956700  |
| C | 2.02628200  | -0.35251200 | 3.68910800  |
| C | 0.93891200  | -0.10304500 | 2.61066500  |
| C | 2.27561100  | 0.88647800  | 4.50503800  |
| C | 2.09098900  | 0.97662800  | 5.82179700  |
| H | -1.19398900 | -0.33811700 | -2.19213100 |
| H | 1.09062800  | 0.25727400  | -1.36485500 |
| C | -2.37207800 | -1.63751900 | -3.40657600 |
| C | -3.26345000 | -2.21961400 | -2.32300000 |
| C | -3.27224900 | -3.59355300 | -2.07753600 |
| C | -4.04520100 | -4.11534400 | -1.03698500 |
| C | -4.82264400 | -3.27997100 | -0.24243900 |
| C | -4.81475000 | -1.90617900 | -0.49101500 |
| C | -4.03819800 | -1.37479600 | -1.51829200 |
| O | 7.15392800  | -3.49376900 | -0.16563600 |
| C | 8.44580800  | -4.08615700 | -0.16952200 |
| C | -5.64745900 | -1.01707600 | 0.38954200  |
| F | -6.89878400 | -1.50128200 | 0.54336500  |
| F | -5.12954600 | -0.90984600 | 1.64694400  |
| F | -5.75065300 | 0.23934200  | -0.09542000 |
| C | -4.04031700 | -5.60073800 | -0.79572400 |
| F | -4.83968600 | -6.25135600 | -1.67177400 |
| F | -2.80150100 | -6.12469600 | -0.93173400 |
| F | -4.47757700 | -5.91369100 | 0.44781800  |

|   |             |             |             |
|---|-------------|-------------|-------------|
| H | 3.14952600  | -1.63578800 | -0.54727800 |
| H | 2.14280700  | 1.02733600  | 0.54979800  |
| H | 5.00566000  | 3.06188400  | -2.70923100 |
| H | 3.01520700  | 1.84860000  | -1.87968500 |
| H | 4.91882800  | -2.43069800 | -0.40426000 |
| H | 9.10398400  | -1.79487800 | -1.06542600 |
| H | 8.64255500  | 0.46345500  | -1.96197800 |
| H | 1.74340700  | -2.71311200 | 0.60301900  |
| H | 0.80750600  | -2.60679400 | 2.08297400  |
| H | 3.80374500  | -2.62352400 | 1.76743700  |
| H | 4.12535400  | -0.93662100 | 3.66070500  |
| H | 4.59999500  | -0.30135500 | 1.33895200  |
| H | 3.82851000  | 1.06968200  | 2.11396000  |
| H | 2.84562900  | -3.00465100 | 3.19589700  |
| H | 1.68113900  | -1.14497000 | 4.36495500  |
| H | 0.78403100  | 0.95531700  | 2.40777900  |
| H | -0.02688100 | -0.53131800 | 2.88185200  |
| H | 2.62579100  | 1.75824800  | 3.95276000  |
| H | -2.89424200 | -0.82956500 | -3.92989100 |
| H | -2.11702900 | -2.40524900 | -4.14006400 |
| H | -2.63396600 | -4.24795000 | -2.66432500 |
| H | -5.41359000 | -3.68759700 | 0.56913800  |
| H | -4.01718800 | -0.30005800 | -1.67261500 |
| H | 8.86059000  | -4.14524100 | -1.18436100 |
| H | 9.14528100  | -3.53985400 | 0.47760100  |
| H | 8.30909300  | -5.09556600 | 0.22210400  |
| O | -1.76210400 | 4.84032100  | 2.36475300  |
| C | 2.55661200  | 4.00818400  | 0.95273600  |
| C | 2.28422800  | 3.99288100  | -0.41234200 |
| C | 1.06200100  | 3.59194900  | -0.90744100 |
| C | 0.04220500  | 3.21126400  | -0.00206200 |
| C | 0.33244200  | 3.29204000  | 1.36615000  |
| C | 1.58727600  | 3.67771600  | 1.87464200  |
| O | -0.60788200 | 2.87573100  | 2.30181900  |
| C | -1.29787800 | 2.73836500  | -0.60196500 |
| C | -2.13715300 | 1.77651600  | 0.24514700  |
| C | -2.12728400 | 3.88791700  | -1.13557600 |
| C | -2.00870800 | 5.17728900  | -0.79022900 |
| C | -3.29186300 | 2.29029600  | 1.07422000  |
| C | -2.93387500 | 2.71878900  | 2.54937900  |
| C | -1.75862300 | 3.63869400  | 2.44667700  |
| C | -1.64719600 | 0.50050000  | 0.36459700  |
| O | -0.59965800 | 0.05680200  | -0.29309600 |
| N | -2.23996200 | -0.40308400 | 1.27375600  |

|   |             |             |             |
|---|-------------|-------------|-------------|
| C | -2.02036400 | -1.77283000 | 1.44130300  |
| C | -1.39909500 | -2.59739200 | 0.48898400  |
| C | -1.22886800 | -3.95934500 | 0.72677800  |
| C | -1.67330000 | -4.56752400 | 1.90577500  |
| C | -2.29527100 | -3.74080000 | 2.85314000  |
| C | -2.46176100 | -2.37602900 | 2.63670900  |
| C | -1.54555100 | -6.05638600 | 2.11978600  |
| H | 0.87171100  | 3.58133500  | -1.97625600 |
| H | 1.75049200  | 3.72093900  | 2.94426100  |
| H | -0.99168600 | 2.15864200  | -1.48530800 |
| H | -2.92610000 | 3.57742400  | -1.80977200 |
| H | -1.25713300 | 5.44786800  | -0.05218400 |
| H | -4.10676900 | 1.56084800  | 1.13663900  |
| H | -3.72302400 | 3.17404000  | 0.59405800  |
| H | -2.66046100 | 1.84163500  | 3.14453000  |
| H | -3.77786600 | 3.23439700  | 3.01389300  |
| H | -2.97177100 | -0.02671200 | 1.85519400  |
| H | -1.06999200 | -2.16833900 | -0.44029600 |
| H | -0.76298200 | -4.56469400 | -0.04723000 |
| H | -2.65879400 | -4.17394700 | 3.78280900  |
| H | -2.95181800 | -1.76595800 | 3.39253600  |
| H | -1.44217900 | -6.30428000 | 3.18230100  |
| H | -2.43162400 | -6.57921200 | 1.74128300  |
| H | -0.67862100 | -6.46393800 | 1.58889900  |
| H | 0.50990300  | -0.60170300 | 0.64006100  |
| H | 1.73167800  | 0.13291500  | 6.40794200  |
| O | 3.40463700  | 4.38062100  | -1.11053300 |
| O | 3.85990000  | 4.37697800  | 1.17048900  |
| C | 4.39696600  | 4.70027400  | -0.12315400 |
| H | 4.61946200  | 5.77352800  | -0.16749100 |
| H | 5.29328900  | 4.09881000  | -0.30443500 |
| C | -2.85422800 | 6.28378200  | -1.26141000 |
| C | -3.56677300 | 6.24144500  | -2.47335200 |
| C | -2.96331100 | 7.43903200  | -0.46728800 |
| C | -4.37432300 | 7.30676100  | -2.86454400 |
| H | -3.46955300 | 5.37442000  | -3.12117300 |
| C | -3.77206800 | 8.50505700  | -0.85798900 |
| H | -2.42076400 | 7.48222400  | 0.47412100  |
| C | -4.48306900 | 8.44345000  | -2.05821800 |
| H | -4.91339000 | 7.25540900  | -3.80726600 |
| H | -3.84734500 | 9.38512000  | -0.22433600 |
| H | -5.11003700 | 9.27551200  | -2.36748900 |
| H | 2.28896500  | 1.89630900  | 6.36508700  |

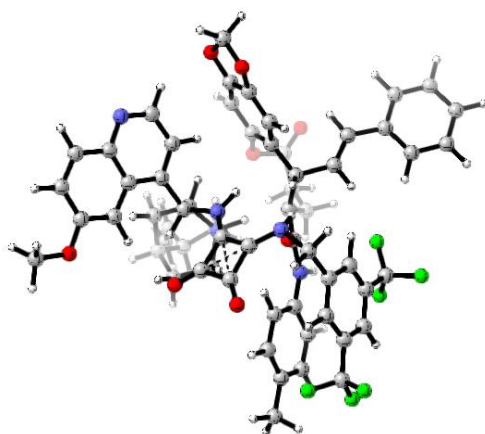

**TS2** for the formation of cis-3aa

# M062X/6-311g(2d,p) EmpiricalDispersion=GD3 scrf=(pcm,solvent=Dichloromethane)

0 1

|   |             |             |             |
|---|-------------|-------------|-------------|
| C | -0.24937900 | -3.35922700 | -2.10984000 |
| C | -0.15225700 | -1.88269900 | -2.24535300 |
| C | 0.88803200  | -1.79509300 | -1.30965300 |
| C | 0.86415800  | -3.25484500 | -1.05113600 |
| O | -0.97167500 | -4.21936100 | -2.57910000 |
| O | 1.42344900  | -3.98546300 | -0.24412800 |
| N | -0.84060500 | -0.96686300 | -2.95728900 |
| N | 1.57636100  | -0.79297700 | -0.72989400 |
| C | 2.71898800  | -1.07079700 | 0.13567200  |
| C | 4.04281300  | -0.79644600 | -0.57740400 |
| C | 2.70417500  | -0.30858200 | 1.48644100  |
| C | 4.92521400  | -1.84480900 | -0.99305800 |
| C | 6.14323400  | -1.44172200 | -1.64747100 |
| N | 6.47524300  | -0.14105800 | -1.89524700 |
| C | 5.62153500  | 0.78521300  | -1.51370200 |
| C | 4.40252900  | 0.50321600  | -0.85404600 |
| C | 4.67724500  | -3.22423100 | -0.79864900 |
| C | 5.59551100  | -4.17402500 | -1.21733800 |
| C | 6.80226400  | -3.77829200 | -1.85175400 |
| C | 7.05743900  | -2.44201700 | -2.05956900 |
| N | 1.34539000  | -0.24491600 | 2.14566200  |
| C | 0.72991000  | -1.61016700 | 2.27711200  |
| C | 1.75766700  | -2.56355800 | 2.93328300  |
| C | 2.87956900  | -1.72102600 | 3.57644600  |
| C | 3.68659700  | -1.00705900 | 2.47260600  |
| C | 2.19862100  | -0.65940500 | 4.47942700  |
| C | 1.50236900  | 0.33922000  | 3.52194000  |
| C | 3.13311400  | 0.05339000  | 5.41802100  |
| C | 3.03522300  | 0.02739800  | 6.74727000  |

|   |             |             |             |
|---|-------------|-------------|-------------|
| H | -0.87093300 | -0.06713900 | -2.48331300 |
| H | 1.38965900  | 0.16432600  | -1.00070300 |
| C | -2.12188500 | -1.34921600 | -3.57667700 |
| C | -3.27527700 | -1.39901400 | -2.58851900 |
| C | -3.92080400 | -2.59879600 | -2.29998500 |
| C | -4.95936600 | -2.63151100 | -1.36209800 |
| C | -5.33065400 | -1.48334200 | -0.67342600 |
| C | -4.66493500 | -0.28516500 | -0.94577700 |
| C | -3.66521500 | -0.23719300 | -1.91030000 |
| O | 5.25677700  | -5.47103000 | -0.97964500 |
| C | 6.11600400  | -6.50334900 | -1.44114600 |
| C | -5.05071700 | 0.95141900  | -0.18414500 |
| F | -6.17954900 | 1.51819200  | -0.66697100 |
| F | -5.27903800 | 0.68583200  | 1.12458500  |
| F | -4.08494900 | 1.90746300  | -0.22913500 |
| C | -5.68289400 | -3.92834800 | -1.12805900 |
| F | -6.54017800 | -4.20280600 | -2.14093100 |
| F | -4.82992100 | -4.97478500 | -1.05071300 |
| F | -6.41332700 | -3.91080600 | 0.01146200  |
| H | 2.64652700  | -2.13134200 | 0.36067100  |
| H | 2.97316100  | 0.73681600  | 1.32698800  |
| H | 5.89412600  | 1.82137800  | -1.70654000 |
| H | 3.76067400  | 1.32614400  | -0.56832400 |
| H | 3.75370100  | -3.58881600 | -0.36281000 |
| H | 7.52250400  | -4.51864500 | -2.17983600 |
| H | 7.96957400  | -2.11401300 | -2.54789200 |
| H | 0.41783500  | -1.94526700 | 1.29380500  |
| H | -0.17478700 | -1.48349400 | 2.87347500  |
| H | 2.15859700  | -3.25421600 | 2.18527900  |
| H | 3.54084500  | -2.35427800 | 4.17513600  |
| H | 4.29984500  | -1.73296800 | 1.93005600  |
| H | 4.37982300  | -0.27960200 | 2.90522400  |
| H | 1.25881000  | -3.17299700 | 3.69383100  |
| H | 1.43728700  | -1.17133400 | 5.08114500  |
| H | 2.06550900  | 1.26639900  | 3.40345000  |
| H | 0.49818000  | 0.59747000  | 3.86271400  |
| H | 3.93484300  | 0.62988100  | 4.95434800  |
| H | -2.32783400 | -0.61695100 | -4.36505900 |
| H | -1.98406300 | -2.32370000 | -4.04846300 |
| H | -3.58607700 | -3.51849700 | -2.76981700 |
| H | -6.09553200 | -1.52609000 | 0.09196900  |
| H | -3.15356100 | 0.69973100  | -2.09737300 |
| H | 6.24405800  | -6.46744900 | -2.53130100 |
| H | 7.10202000  | -6.45842200 | -0.95881800 |

|   |             |             |             |
|---|-------------|-------------|-------------|
| H | 5.62575500  | -7.43935000 | -1.16811100 |
| O | 0.80071900  | 5.25708400  | 2.01417100  |
| C | 3.88054400  | 3.90768900  | -0.91995100 |
| C | 3.02586200  | 3.51698400  | -1.95009600 |
| C | 1.76168600  | 3.02812000  | -1.70054300 |
| C | 1.31645300  | 2.92973300  | -0.35844900 |
| C | 2.20394400  | 3.32981700  | 0.64546400  |
| C | 3.49823200  | 3.82164200  | 0.40173500  |
| O | 1.79329000  | 3.20534100  | 1.96909900  |
| C | -0.12499500 | 2.45900400  | -0.14469400 |
| C | -0.56859500 | 1.67848200  | 1.13646500  |
| C | -1.14717900 | 3.52752100  | -0.47896800 |
| C | -0.97216600 | 4.85315000  | -0.56471700 |
| C | -1.14262700 | 2.52370200  | 2.29262400  |
| C | -0.19773600 | 3.38288400  | 3.19708600  |
| C | 0.81330600  | 4.11012500  | 2.37270200  |
| C | -1.35674000 | 0.52349300  | 0.72988200  |
| O | -1.19977400 | -0.05056900 | -0.37508000 |
| N | -2.23707300 | -0.06449900 | 1.65013600  |
| C | -2.75630800 | -1.37264800 | 1.65174500  |
| C | -2.27674300 | -2.40873300 | 0.83758600  |
| C | -2.78100900 | -3.70119300 | 0.97040600  |
| C | -3.77639900 | -4.01646300 | 1.90036500  |
| C | -4.26480400 | -2.96937200 | 2.69484800  |
| C | -3.76948600 | -1.67467300 | 2.57902600  |
| C | -4.33275400 | -5.41438900 | 2.02654400  |
| H | 1.10740100  | 2.74172300  | -2.51778400 |
| H | 4.14038600  | 4.11687200  | 1.22222100  |
| H | -0.26436600 | 1.70483100  | -0.92557000 |
| H | -2.14070400 | 3.10663600  | -0.61436500 |
| H | 0.02543800  | 5.26050000  | -0.41508300 |
| H | -1.66082800 | 1.87954000  | 3.01055700  |
| H | -1.89970000 | 3.22035800  | 1.90674100  |
| H | 0.32901800  | 2.74903000  | 3.91417700  |
| H | -0.79610600 | 4.11144500  | 3.74936800  |
| H | -2.64882500 | 0.54468700  | 2.33905100  |
| H | -1.53878200 | -2.19044400 | 0.08444000  |
| H | -2.39306800 | -4.47318400 | 0.31053900  |
| H | -5.04925600 | -3.17040800 | 3.42168800  |
| H | -4.17535900 | -0.88455900 | 3.20775800  |
| H | -4.39905400 | -5.72615000 | 3.07593800  |
| H | -5.33959700 | -5.47575800 | 1.59913200  |
| H | -3.70788800 | -6.13970500 | 1.49638100  |
| H | 0.63815600  | 0.50805000  | 1.62720200  |



|   |             |             |             |
|---|-------------|-------------|-------------|
| H | 2.24607600  | -0.52707400 | 7.25156300  |
| O | 3.67335600  | 3.64156600  | -3.15622300 |
| O | 5.09453200  | 4.28388700  | -1.44353900 |
| C | 4.87715400  | 4.35944800  | -2.86271100 |
| H | 4.76043100  | 5.41270300  | -3.15573200 |
| H | 5.71577700  | 3.88947900  | -3.38056300 |
| C | -2.02264700 | 5.84653200  | -0.83591100 |
| C | -3.39241100 | 5.52363000  | -0.91175000 |
| C | -1.65278000 | 7.19012000  | -1.02099900 |
| C | -4.34263500 | 6.50548700  | -1.17609800 |
| H | -3.72109600 | 4.50056600  | -0.75174300 |
| C | -2.60495000 | 8.17408900  | -1.28481800 |
| H | -0.60153600 | 7.46079300  | -0.95352300 |
| C | -3.95611600 | 7.83616900  | -1.36664100 |
| H | -5.39369700 | 6.23260800  | -1.22862600 |
| H | -2.29032100 | 9.20526600  | -1.42423800 |
| H | -4.70219400 | 8.59956500  | -1.57056900 |
| H | 3.73961500  | 0.55619900  | 7.38318100  |

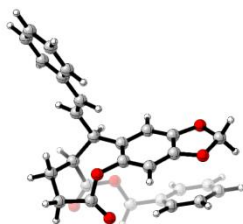

***Trans-3aa major***

# M062X/6-311g(2d,p) EmpiricalDispersion=GD3 scrf=(pcm,solvent=Dichloromethane)

|     |             |             |             |
|-----|-------------|-------------|-------------|
| 0 1 |             |             |             |
| C   | -0.12575100 | 1.85116600  | 2.09331500  |
| C   | 0.71255600  | 3.08348700  | 1.89798600  |
| C   | 1.48205600  | 2.98989300  | 0.55775500  |
| C   | 0.71224300  | 2.39294400  | -0.66287300 |
| O   | -1.31485700 | 1.81113300  | 2.29413900  |
| C   | -0.73474700 | 2.88418300  | -0.67609600 |
| C   | -1.26414600 | -2.26001800 | 1.06024700  |
| C   | -1.18880900 | -2.22071500 | -0.32905300 |
| C   | -0.51382700 | -1.22328900 | -0.99605300 |
| C   | 0.11182500  | -0.20954600 | -0.23725500 |
| C   | 0.02261700  | -0.28620500 | 1.15330300  |

|   |             |             |             |
|---|-------------|-------------|-------------|
| C | -0.66432100 | -1.29673600 | 1.84208100  |
| O | -2.02590500 | -3.33000600 | 1.45817000  |
| C | -2.43182000 | -3.99392500 | 0.25003400  |
| O | -1.88661000 | -3.27682700 | -0.86208100 |
| O | 0.64845200  | 0.72996900  | 1.88193700  |
| C | 0.90428700  | 0.85899200  | -0.98851700 |
| C | 2.39023100  | 0.56283800  | -1.05202000 |
| C | 3.04826400  | -0.38425400 | -0.36972800 |
| C | 4.48940500  | -0.67276500 | -0.42502900 |
| C | 5.03914100  | -1.54631400 | 0.52985000  |
| C | 6.40053900  | -1.84679600 | 0.53663900  |
| C | 7.24611500  | -1.28314500 | -0.41957700 |
| C | 6.71449800  | -0.42044500 | -1.38317900 |
| C | 5.35515800  | -0.12139800 | -1.38826700 |
| O | -1.60422400 | 1.92016100  | -1.01778600 |
| O | -1.05059800 | 4.02298900  | -0.39781900 |
| C | -3.01860500 | 2.22155500  | -0.85152000 |
| C | -3.74666900 | 0.91018100  | -0.74269300 |
| C | -3.68630200 | 0.18102000  | 0.45207700  |
| C | -4.34187400 | -1.04498400 | 0.55928800  |
| C | -5.05852100 | -1.55536200 | -0.52673300 |
| C | -5.11567900 | -0.83732000 | -1.72239100 |
| C | -4.46062600 | 0.39094700  | -1.82742400 |
| H | 0.04343700  | 3.94401900  | 1.91962900  |
| H | 1.43430300  | 3.17405400  | 2.71845400  |
| H | 2.38216600  | 2.38701100  | 0.69887800  |
| H | 1.80092200  | 4.00356500  | 0.29865900  |
| H | 1.16009100  | 2.88911500  | -1.53558900 |
| H | -0.48348300 | -1.20636200 | -2.07983500 |
| H | -0.72867700 | -1.28714800 | 2.92256300  |
| H | -2.04194400 | -5.01914100 | 0.25197100  |
| H | -3.52528100 | -3.98603200 | 0.18555800  |
| H | 0.53768500  | 0.78745400  | -2.02183300 |
| H | 2.94156300  | 1.22305900  | -1.72295400 |
| H | 2.48118600  | -1.01128700 | 0.31531600  |
| H | 4.38600200  | -1.98797000 | 1.27913600  |
| H | 6.79980700  | -2.52263300 | 1.28838500  |
| H | 8.30727900  | -1.51682800 | -0.42001100 |
| H | 7.36296700  | 0.01581600  | -2.13864700 |
| H | 4.95980800  | 0.53681500  | -2.15667600 |
| H | -3.12619600 | 2.82984200  | 0.05010600  |
| H | -3.35104500 | 2.81235600  | -1.71091200 |
| H | -3.10628100 | 0.56793900  | 1.28457300  |
| H | -4.27992400 | -1.60817000 | 1.48626800  |

|   |             |             |             |
|---|-------------|-------------|-------------|
| H | -5.57557200 | -2.50807100 | -0.44066100 |
| H | -5.66896700 | -1.23129400 | -2.57064100 |
| H | -4.50335400 | 0.95063000  | -2.75922300 |

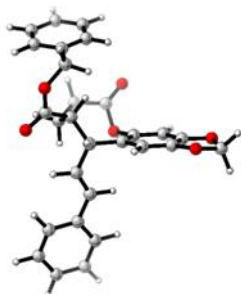

***Cis-3aa minor***

# M062X/6-311g(2d,p) EmpiricalDispersion=GD3 scrf=(pcm,solvent=Dichloromethane)

|     |             |             |             |
|-----|-------------|-------------|-------------|
| 0 1 |             |             |             |
| C   | -1.21961900 | 0.36456800  | -1.97611600 |
| C   | -1.53865700 | -1.10936900 | -1.96868600 |
| C   | -0.85656200 | -1.78570200 | -0.75925600 |
| C   | -0.93893000 | -0.94294200 | 0.55348400  |
| O   | -1.99207200 | 1.28145900  | -2.09093400 |
| C   | -1.37654600 | -1.85455900 | 1.69440200  |
| C   | 0.99531300  | 3.80720200  | -0.35572200 |
| C   | 1.14496200  | 3.47833000  | 0.98955200  |
| C   | 0.94723000  | 2.19525400  | 1.45520600  |
| C   | 0.58550000  | 1.19361500  | 0.52722100  |
| C   | 0.45364500  | 1.55774000  | -0.81811200 |
| C   | 0.64107100  | 2.86216900  | -1.29623600 |
| O   | 1.21819700  | 5.14925900  | -0.53499700 |
| C   | 1.70168000  | 5.62679700  | 0.72877300  |
| O   | 1.46955800  | 4.60608700  | 1.70714700  |
| O   | 0.12863300  | 0.53877700  | -1.71300200 |
| C   | 0.41067700  | -0.23849800 | 1.02217800  |
| C   | 1.60671200  | -1.13502100 | 0.79031500  |
| C   | 2.72046400  | -0.80712500 | 0.12156700  |
| C   | 3.89178400  | -1.66500400 | -0.11287200 |
| C   | 4.95957700  | -1.15634000 | -0.87298000 |
| C   | 6.09398600  | -1.92423400 | -1.13317900 |
| C   | 6.18699700  | -3.22433100 | -0.63566700 |
| C   | 5.13446300  | -3.74581700 | 0.12360800  |
| C   | 4.00289600  | -2.97832500 | 0.38245400  |
| O   | -2.47316600 | -1.54085200 | 2.44031000  |

|   |             |             |             |
|---|-------------|-------------|-------------|
| O | -0.75491100 | -2.84844600 | 1.99636200  |
| C | -3.36781300 | -0.46909600 | 2.08040600  |
| C | -4.10998600 | -0.72323700 | 0.78621800  |
| C | -4.36422100 | 0.32541600  | -0.10254300 |
| C | -5.05024600 | 0.09133000  | -1.29559400 |
| C | -5.48195400 | -1.19765700 | -1.61062700 |
| C | -5.22266200 | -2.25229600 | -0.72933000 |
| C | -4.54177700 | -2.01676100 | 0.46459700  |
| H | -2.62605400 | -1.20891500 | -1.94198400 |
| H | -1.17763000 | -1.56759100 | -2.89802800 |
| H | 0.19449300  | -1.96984400 | -0.99033800 |
| H | -1.31988900 | -2.76330400 | -0.60116500 |
| H | 1.07457600  | 1.96098000  | 2.50693400  |
| H | 0.50274600  | 3.09443600  | -2.34409300 |
| H | 2.78050200  | 5.82612600  | 0.65463600  |
| H | 1.15301500  | 6.53060700  | 1.00816700  |
| H | 0.31099700  | -0.14900100 | 2.11406500  |
| H | 1.48621900  | -2.12440700 | 1.22562200  |
| H | 2.79240500  | 0.19081000  | -0.30761800 |
| H | 4.89336100  | -0.14376800 | -1.26510900 |
| H | 6.90456300  | -1.50601100 | -1.72440500 |
| H | 7.06912300  | -3.82675300 | -0.83509500 |
| H | 5.19749300  | -4.75718700 | 0.51695400  |
| H | 3.19848800  | -3.40260300 | 0.97598100  |
| H | -4.06039500 | -0.43086200 | 2.92687400  |
| H | -2.83382300 | 0.48836200  | 2.05065000  |
| H | -3.99485900 | 1.32399600  | 0.11571500  |
| H | -5.21375000 | 0.91090900  | -1.98833700 |
| H | -6.00695700 | -1.38408600 | -2.54353600 |
| H | -5.54932100 | -3.25944800 | -0.97391200 |
| H | -4.32730200 | -2.83511700 | 1.14598500  |
| H | -1.66582800 | -0.14425400 | 0.41457600  |

## Reference

- (1) Yang, W.-L.; Wang, Y.-L.; Li, W.; Gu, B.-M.; Wang, S.-W.; Luo, X.; Tian, B.-X.; Deng, W.-P. Diastereo- and Enantioselective Synthesis of Eight-Membered Heterocycles via an Allylation/Ring Expansion Sequence Enabled by Multiple Catalysis. *ACS Catal.* **2021**, *11* (20), 12557–12564. <https://doi.org/10.1021/acscatal.1c03711>.
- (2) Frisch, M. J.; Trucks, G. W.; Schlegel, H. B.; Scuseria, G. E.; Robb, M. A.; Cheeseman, J. R.; Scalmani, G.; Barone, V.; Petersson, G. A.; Nakatsuji, H.; Li, X.; Caricato, M.; Marenich, A. V.; Bloino, J.; Janesko, B. G.; Gomperts, R.; Mennucci, B.; Hratchian, H. P.; Ortiz, J. V.; Izmaylov, A. F.; Sonnenberg, J. L.; Williams-Young, D.; Ding, F.; Lipparini, F.; Egidi, F.; Goings, J.; Peng, B.; Petrone, A.; Henderson, T.; Ranasinghe, D.; Zakrzewski, V. G.; Gao, J.;

- Rega, N.; Zheng, G.; Liang, W.; Hada, M.; Ehara, M.; Toyota, K.; Fukuda, R.; Hasegawa, J.; Ishida, M.; Nakajima, T.; Honda, Y.; Kitao, O.; Nakai, H.; Vreven, T.; Throssell, K.; Montgomery, J. A., Jr.; Peralta, J. E.; Ogliaro, F.; Bearpark, M. J.; Heyd, J. J.; Brothers, E. N.; Kudin, K. N.; Staroverov, V. N.; Keith, T. A.; Kobayashi, R.; Normand, J.; Raghavachari, K.; Rendell, A. P.; Burant, J. C.; Iyengar, S. S.; Tomasi, J.; Cossi, M.; Millam, J. M.; Klene, M.; Adamo, C.; Cammi, R.; Ochterski, J. W.; Martin, R. L.; Morokuma, K.; Farkas, O.; Foresman, J. B.; Fox, D. J. Gaussian~16 Revision C.01, 2016.
- (3) Grimme, S.; Antony, J.; Ehrlich, S.; Krieg, H. A Consistent and Accurate Ab Initio Parametrization of Density Functional Dispersion Correction (DFT-D) for the 94 Elements H-Pu. *J. Chem. Phys.* **2010**, *132* (15), 154104. <https://doi.org/10.1063/1.3382344>.
- (4) Zhao, Y.; Truhlar, D. G. Density Functionals with Broad Applicability in Chemistry. *Acc. Chem. Res.* **2008**, *41* (2), 157–167. <https://doi.org/10.1021/ar700111a>.
- (5) Zhao, Y.; Truhlar, D. G. The M06 Suite of Density Functionals for Main Group Thermochemistry, Thermochemical Kinetics, Noncovalent Interactions, Excited States, and Transition Elements: Two New Functionals and Systematic Testing of Four M06-Class Functionals and 12 Other Functionals. *Theor. Chem. Acc.* **2008**, *120* (1), 215–241. <https://doi.org/10.1007/s00214-007-0310-x>.
- (6) Takeuchi, R.; Kashio, M. Highly Selective Allylic Alkylation with a Carbon Nucleophile at the More Substituted Allylic Terminus Catalyzed by an Iridium Complex: An Efficient Method for Constructing Quaternary Carbon Centers. *Angew. Chem. Int. Ed. Engl.* **1997**, *36* (3), 263–265. <https://doi.org/10.1002/anie.199702631>.

## 7 X-ray Crystallographic Data

### X-ray Crystallographic Data of Compound 3aa

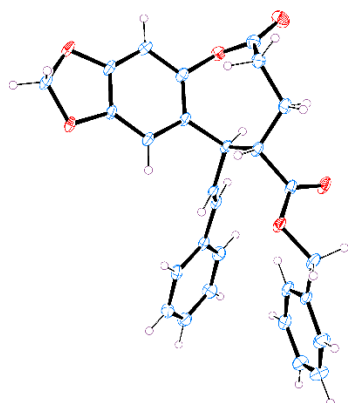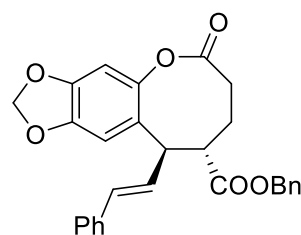

CCDC 2247138

Bond precision: C-C = 0.0041 Å

Wavelength=1.54184

Cell: a=5.75373 (14)  
alpha=90

b=13.0355 (3)  
beta=90

c=30.5621 (8)  
gamma=90

Temperature: 150 K

|                        | Calculated                                     | Reported                                       |
|------------------------|------------------------------------------------|------------------------------------------------|
| Volume                 | 2292.24 (10)                                   | 2292.25 (9)                                    |
| Space group            | P 21 21 21                                     | P 21 21 21                                     |
| Hall group             | P 2ac 2ab                                      | P 2ac 2ab                                      |
| Moiety formula         | C <sub>28</sub> H <sub>24</sub> O <sub>6</sub> | C <sub>28</sub> H <sub>24</sub> O <sub>6</sub> |
| Sum formula            | C <sub>28</sub> H <sub>24</sub> O <sub>6</sub> | C <sub>28</sub> H <sub>24</sub> O <sub>6</sub> |
| Mr                     | 456.47                                         | 456.47                                         |
| Dx, g cm <sup>-3</sup> | 1.323                                          | 1.323                                          |
| Z                      | 4                                              | 4                                              |
| Mu (mm <sup>-1</sup> ) | 0.760                                          | 0.760                                          |
| F000                   | 960.0                                          | 960.0                                          |
| F000'                  | 963.10                                         |                                                |
| h, k, lmax             | 7, 16, 38                                      | 6, 15, 38                                      |
| Nref                   | 4808 [ 2795]                                   | 4441                                           |
| Tmin, Tmax             | 0.886, 0.913                                   | 0.586, 1.000                                   |
| Tmin'                  | 0.886                                          |                                                |

Correction method= # Reported T Limits: Tmin=0.586 Tmax=1.000  
AbsCorr = MULTI-SCAN

Data completeness= 1.59/0.92

Theta(max)= 76.329

R(reflections)= 0.0483 ( 4019)

wR2(reflections)=  
0.1229 ( 4441)

S = 1.035

Npar= 307

Displacement ellipsoids are drawn at 50% probability level.

The formation of single crystal (In a 10 mL glass bottle was added 100mg 3aa product, 2 mL petroleum ether, followed by adding about 0.5 mL ethyl acetate, ultrasound for about 2 minutes to obtain a supersaturated solution. After filtration, two drops of ethyl acetate were added to the filtrate and placed in a fume hood. About 48-72 hours, a small amount of crystals were obtained for single crystal testing).

## X-ray Crystallographic Data of Compound 3na

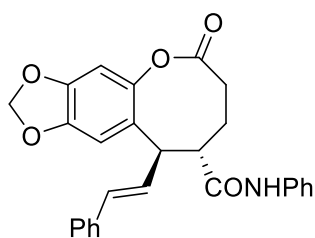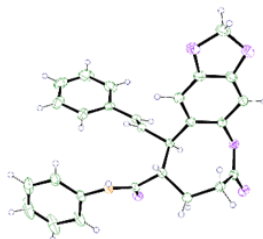

CCDC 2170067

Bond precision: C-C = 0.0042 Å Wavelength=1.54184  
Cell: a=12.8629(1) b=18.0002(2) c=19.3080(1)  
alpha=90 beta=98.593(1) gamma=90  
Temperature: 150 K

|                                     | Calculated                                       | Reported                                                        |
|-------------------------------------|--------------------------------------------------|-----------------------------------------------------------------|
| Volume                              | 4420.29(7)                                       | 4420.29(7)                                                      |
| Space group                         | P 21                                             | P 1 21 1                                                        |
| Hall group                          | P 2yb                                            | P 2yb                                                           |
| Moiety formula                      | C <sub>27</sub> H <sub>23</sub> N O <sub>5</sub> | 4(C <sub>27</sub> H <sub>23</sub> N O <sub>5</sub> )            |
| Sum formula                         | C <sub>27</sub> H <sub>23</sub> N O <sub>5</sub> | C <sub>108</sub> H <sub>92</sub> N <sub>4</sub> O <sub>20</sub> |
| Mr                                  | 441.46                                           | 1765.85                                                         |
| D <sub>x</sub> , g cm <sup>-3</sup> | 1.327                                            | 1.327                                                           |
| Z                                   | 8                                                | 2                                                               |
| Mu (mm <sup>-1</sup> )              | 0.748                                            | 0.748                                                           |
| F <sub>000</sub>                    | 1856.0                                           | 1856.0                                                          |
| F <sub>000</sub> '                  | 1861.88                                          |                                                                 |
| h, k, l <sub>max</sub>              | 16, 22, 24                                       | 16, 22, 23                                                      |
| N <sub>ref</sub>                    | 18839[ 9731]                                     | 16150                                                           |
| T <sub>min</sub> , T <sub>max</sub> | 0.874, 0.914                                     | 0.400, 1.000                                                    |
| T <sub>min</sub> '                  | 0.874                                            |                                                                 |

Correction method= # Reported T Limits: T<sub>min</sub>=0.400 T<sub>max</sub>=1.000  
AbsCorr = MULTI-SCAN

Data completeness= 1.66/0.86 Theta(max)= 77.601

R(reflections)= 0.0379( 15443) wR<sub>2</sub>(reflections)=  
0.0994( 16150)  
S = 1.028 N<sub>par</sub>= 1190

Displacement ellipsoids are drawn at 50% probability level.

The formation of single crystal (0.5g 3na product added to 10 ml petroleum ether, followed by adding 2 ml ethyl acetate, ultrasound for about 2 minutes, to obtain a supersaturated solution, after filtration, add a few drops of ethyl acetate to the filtrate, placed in a fume hood, about 12 hours to obtain crystals for single crystal testing)

## 8 The characterization of data

### benzyl (9S,10R)-6-oxo-10-((E)-styryl)-7,8,9,10-tetrahydro-6H-[1,3]dioxolo[4',5':4,5]benzo[1,2-b]oxocine-9-carboxylate (3aa)

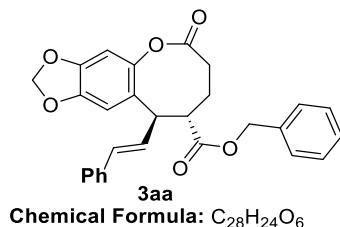

The product was purified by flash column chromatography on silica gel (petroleum ether/ethyl acetate = 10:1-5:1-4:1) as a colourless oil at room temperature, 78% yield (35mg).  $[\alpha]_D^{24} = +50$  (*c* 1.0 (10mg/mL), CH<sub>2</sub>Cl<sub>2</sub>, 98 % ee). **CCDC 2247138**

**<sup>1</sup>H NMR** (400 MHz, Chloroform-*d*)  $\delta$  7.30 – 7.21 (m, 10H), 6.82 (s, 1H), 6.58 (s, 1H), 6.45 – 6.34 (m, 2H), 6.00 – 5.95 (m, 2H), 5.02 (s, 2H), 3.78 (t, *J* = 8.3 Hz, 1H), 2.86 (d, *J* = 12.8 Hz, 1H), 2.61 – 2.47 (m, 1H), 2.41 – 2.08 (m, 3H).

**<sup>13</sup>C NMR** (101 MHz, Chloroform-*d*)  $\delta$  173.0, 172.9, 147.4, 146.5, 144.4, 136.5, 135.2, 132.6, 128.55, 128.51, 128.50, 128.4, 127.72, 127.70, 126.4, 108.0, 102.0, 67.6, 44.9, 50.7, 28.9, 26.8.

**HPLC**: Chiral Ia-3 column, (*n*-hexane/*i*-PrOH = 80:20), flow rate 1 mL/min, I = 250 nm;  $t_{\text{Retention-major}} = 24.99$  min,  $t_{\text{Retention-minor}} = 15.54$  min.

**HRMS** (ESI):  $[M+Na]^+$  calcd for [C<sub>28</sub>H<sub>24</sub>O<sub>6</sub>Na]:479.1465, found:479.1468.

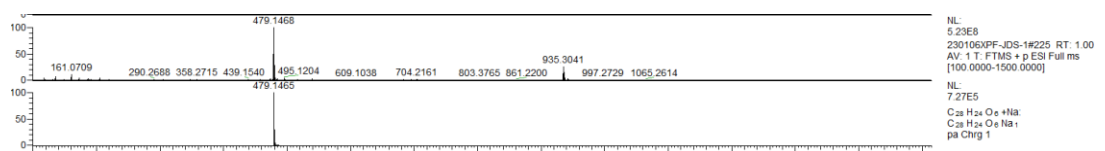

### 4-methoxybenzyl (9S,10R)-6-oxo-10-((E)-styryl)-7,8,9,10-tetrahydro-6H-[1,3]dioxolo[4',5':4,5]benzo[1,2-b]oxocine-9-carboxylate(3ba)

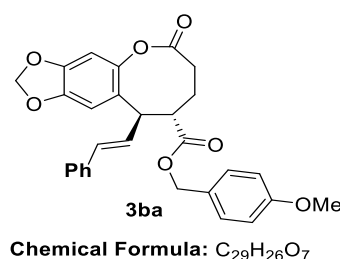

The product was purified by flash column chromatography on silica gel (petroleum ether/ethyl acetate = 10:1-5:1-4:1) as a colourless oil at room temperature, 80% yield (39mg).  $[\alpha]_D^{19} = +43$  (*c* 1.0 (10mg/mL), CH<sub>2</sub>Cl<sub>2</sub>, 98 % ee).



**<sup>1</sup>H NMR** (400 MHz, Chloroform-*d*) δ 7.31 – 7.20 (m, 5H), 7.19 – 7.13 (m, 2H), 6.81 – 6.75 (m, 3H), 6.57 (s, 1H), 6.38 (d, *J* = 7.2 Hz, 2H), 5.98 (q, *J* = 1.3 Hz, 2H), 4.96 (d, *J* = 2.9 Hz, 2H), 3.77 (s, 4H), 2.82 (s, 1H), 2.53 (td, *J* = 8.7, 4.0 Hz, 1H), 2.35 – 2.08 (m, 3H).

**<sup>13</sup>C NMR** (101 MHz, CDCl<sub>3</sub>) δ 173.1, 172.9, 159.6, 147.3, 146.4, 144.3, 136.5, 132.5, 130.4, 128.5, 127.7, 127.6, 127.3, 126.6, 126.4, 113.8, 107.72, 102.3, 102.0, 66.6, 55.2, 51.1, 44.3, 28.9, 26.4.

**HPLC**: Chiral Ia-3 column, (*n*-hexane/*i*-PrOH = 80:20), flow rate 1 mL/min, I = 250 nm; *t*<sub>Retention-major</sub> = 33.19 min, *t*<sub>Retention-minor</sub> = 20.55 min.

**HRMS** (ESI): [M+Na]<sup>+</sup> calcd for [C<sub>29</sub>H<sub>26</sub>O<sub>7</sub>Na]:509.1571, found:509.1576.

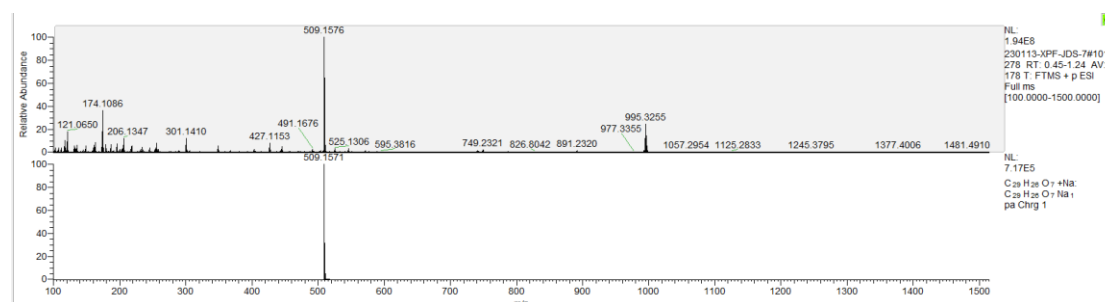

**4-(methoxycarbonyl)benzyl (9S,10R)-6-oxo-10-((E)-styryl)-7,8,9,10-tetrahydro-6H-[1,3]dioxolo[4',5':4,5]benzo[1,2-b]oxocine-9-carboxylate (3ca)**

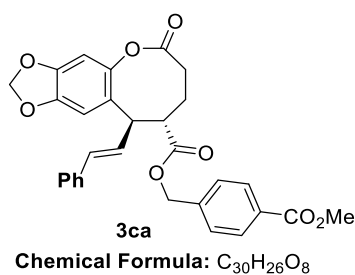

The product was purified by flash column chromatography on silica gel (petroleum ether/ethyl acetate = 10:1-5:1-4:1) as a colourless oil at room temperature, 63% yield (32mg). [ $\alpha$ ]<sub>D</sub><sup>19</sup> = +56 (*c* 1.0 (10mg/mL), CH<sub>2</sub>Cl<sub>2</sub>, 97 % ee).

**<sup>1</sup>H NMR** (600 MHz, Chloroform-*d*) δ 7.92 – 7.86 (m, 2H), 7.29 (d, *J* = 8.3 Hz, 2H), 7.27 – 7.23 (m, 2H), 7.21 (d, *J* = 7.3 Hz, 3H), 6.79 (s, 1H), 6.58 (s, 1H), 6.45 – 6.30 (m, 2H), 5.97 (q, *J* = 1.4 Hz, 2H), 5.07 (d, *J* = 3.1 Hz, 2H), 3.91 (s, 3H), 3.78 (dd, *J* = 11.0, 6.3 Hz, 1H), 2.87 (q, *J* = 8.9, 8.1 Hz, 1H), 2.55 (ddd, *J* = 12.4, 8.7, 3.5 Hz, 1H), 2.33 (ddd, *J* = 12.9, 9.8, 3.5 Hz, 1H), 2.25 (dtd, *J* = 13.6, 9.9, 3.4 Hz, 1H), 2.19 – 2.11 (m, 1H).

$^{13}\text{C}$  NMR (151 MHz,  $\text{CDCl}_3$ )  $\delta$  172.9, 172.7, 166.6, 147.5, 146.5, 144.5, 140.2, 136.3, 132.7, 130.0, 129.8, 128.5, 128.2, 127.8, 127.6, 126.5, 126.3, 107.2, 102.4, 102.1, 66.1, 52.1, 50.6, 44.5, 28.9, 25.8.

**HPLC:** Chiral Ia-3 column, (*n*-hexane/*i*-PrOH = 80:20), flow rate 1 mL/min, I = 250 nm;  $t_{\text{Reten-major}} = 57.26$  min,  $t_{\text{Reten-minor}} = 31.63$  min.

**HRMS** (LTQ-ORBITRAP ESI):  $[\text{M}+\text{Na}]^+$  calcd for  $[\text{C}_{30}\text{H}_{26}\text{O}_8\text{Na}]$ :537.1520, found:537.1520.

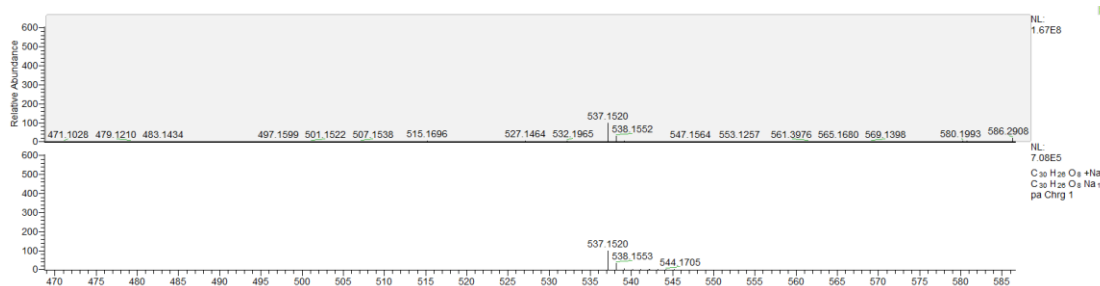

**Phenethyl** (9*S*,10*R*)-6-oxo-10-((*E*)-styryl)-7,8,9,10-tetrahydro-6*H*-[1,3]dioxolo[4',5':4,5]benzo[1,2-*b*]oxocine-9-carboxylate (**3da**)

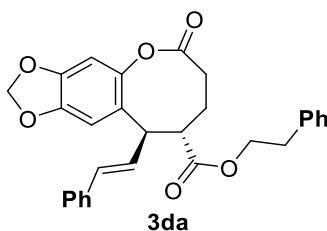

**Chemical Formula:**  $\text{C}_{29}\text{H}_{26}\text{O}_6$

The product was purified by flash column chromatography on silica gel (petroleum ether/ethyl acetate = 10:1-5:1-4:1) as a white solid, M. P. = 139-141°C, 84% yield (39mg),  $[\alpha]_{\text{D}}^{24.3} = +79$  (*c* 1.0 (10mg/mL),  $\text{CH}_2\text{Cl}_2$ , 98 % ee).

$^1\text{H}$  NMR (400 MHz, Chloroform-*d*)  $\delta$  7.31 – 7.19 (m, 8H), 7.13 (d,  $J = 7.0$  Hz, 2H), 6.75 (s, 1H), 6.58 (s, 1H), 6.33 (d,  $J = 4.0$  Hz, 2H), 5.98 (d,  $J = 3.9$  Hz, 2H), 4.18 (t,  $J = 6.2$  Hz, 2H), 3.79 – 3.61 (m, 1H), 2.86 (t,  $J = 7.0$  Hz, 2H), 2.82 – 2.71 (m, 1H), 2.52 (td,  $J = 10.3, 8.5, 2.9$  Hz, 1H), 2.34 – 2.14 (m, 2H), 2.08 (dt,  $J = 14.7, 5.3$  Hz, 1H).

$^{13}\text{C}$  NMR (101 MHz,  $\text{CDCl}_3$ )  $\delta$  173.0, 172.8, 147.4, 146.4, 144.4, 137.5, 136.5, 132.5, 128.9, 128.5, 128.48, 127.7, 127.6, 126.6, 126.55, 126.3, 107.9, 102.3, 102.0, 65.4, 50.4, 44.6, 34.9, 28.9, 26.4.

**HPLC:** Chiral Ia-3 column, (*n*-hexane/*i*-PrOH = 80:20), flow rate 1 mL/min, I = 250 nm;  $t_{\text{Reten-major}} = 22.30$  min,  $t_{\text{Reten-minor}} = 14.28$  min.

**HRMS** (ESI):  $[\text{M}+\text{Na}]^+$  calcd for  $[\text{C}_{29}\text{H}_{26}\text{O}_6\text{Na}]$ :493.1622, found:493.1626.

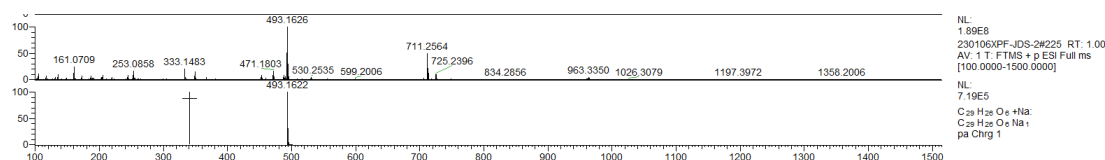

**3-phenylpropyl (9S,10R)-6-oxo-10-((E)-styryl)-7,8,9,10-tetrahydro-6H-[1,3]dioxolo[4',5':4,5]benzo[1,2-b]oxocine-9-carboxylate (3ea)**

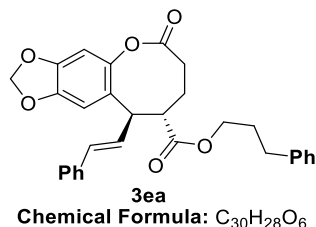

The product was purified by flash column chromatography on silica gel (petroleum ether/ethyl acetate = 10:1-5:1-4:1) as a pale-yellow oil at room temperature, 72% yield (35mg).  $[\alpha]_D^{19} = +41$  (*c* 1.0 (10mg/mL), CH<sub>2</sub>Cl<sub>2</sub>, 97 % ee)

<sup>1</sup>H NMR (400 MHz, Chloroform-d)  $\delta$  7.33 – 7.13 (m, 8H), 7.08 – 7.04 (m, 2H), 6.84 (s, 1H), 6.58 (s, 1H), 6.48 – 6.36 (m, 2H), 5.96 (dd, *J* = 8.4, 1.4 Hz, 2H), 4.02 (t, *J* = 6.6 Hz, 2H), 3.77 (t, *J* = 8.5 Hz, 1H), 2.79 (dt, *J* = 9.4, 3.9 Hz, 1H), 2.62 – 2.50 (m, 3H), 2.37 – 2.08 (m, 3H), 1.92 – 1.82 (m, 2H).

<sup>13</sup>C NMR (101 MHz, Chloroform-d)  $\delta$  173.1, 172.8, 147.3, 146.4, 144.4, 140.8, 136.4, 132.4, 128.5, 128.3, 128.2, 127.8, 127.7, 126.6, 126.3, 125.9, 107.9, 102.3, 102.0, 64.3, 50.7, 32.0, 29.9, 28.9, 26.5.

**HPLC:** Chiral Ia-3 column, (*n*-hexane/*i*-PrOH = 80:20), flow rate 1 mL/min, I = 250 nm; *t*<sub>Retention-major</sub> = 24.30 min, *t*<sub>Retention-minor</sub> = 15.35 min.

**HRMS (ESI):** [M+Na]<sup>+</sup> calcd for [C<sub>30</sub>H<sub>28</sub>O<sub>6</sub>Na]: 507.1778, found: 507.1785.

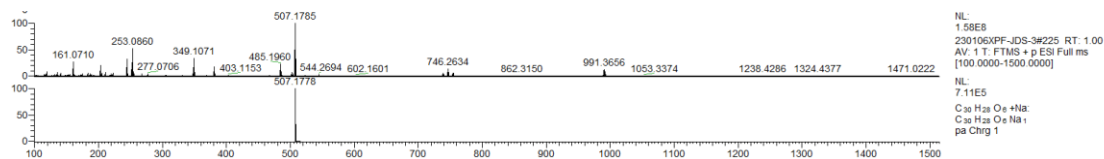

**but-3-en-1-yl** (9S,10R)-6-oxo-10-((E)-styryl)-7,8,9,10-tetrahydro-6H-[1,3]dioxolo[4',5':4,5]benzo[1,2-b]oxocine-9-carboxylate(3fa)

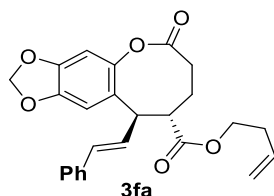

Chemical Formula: C<sub>25</sub>H<sub>24</sub>O<sub>6</sub>

The product was purified by flash column chromatography on silica gel (petroleum ether/ethyl acetate = 10:1-5:1) as a colorless oil at room temperature, 77% yield (32mg).

$[\alpha]_D^{24} = +93$  (*c* 1.0 (10mg/mL), CH<sub>2</sub>Cl<sub>2</sub>, 98 % ee)

<sup>1</sup>H NMR (400 MHz, Chloroform-*d*) δ 7.35 – 7.26 (m, 4H), 7.25 – 7.19 (m, 1H), 6.85 (s, 1H), 6.59 (s, 1H), 6.48 – 6.34 (m, 2H), 6.01 – 5.97 (m, 2H), 5.68 (ddt, *J* = 17.0, 10.3, 6.7 Hz, 1H), 5.08 – 4.99 (m, 2H), 4.05 (t, *J* = 6.7 Hz, 2H), 3.82 – 3.70 (m, 1H), 2.80 (s, 1H), 2.55 (ddd, *J* = 12.2, 8.6, 3.3 Hz, 1H), 2.38 – 2.27 (m, 3H), 2.25 – 2.07 (m, 2H).

<sup>13</sup>C NMR (101 MHz, Chloroform-*d*) δ 173.1, 172.9, 147.4, 146.4, 144.4, 136.5, 133.7, 132.5, 128.5, 127.8, 127.7, 126.6, 126.3, 117.3, 107.9, 102.4, 102.0, 63.9, 50.8, 44.5, 32.9, 28.9, 26.5.

**HPLC:** Chiral Ia-3 column, (*n*-hexane/*i*-PrOH = 80:20), flow rate 1 mL/min, I = 254 nm; *t*<sub>Retention-major</sub> = min, *t*<sub>Retention-minor</sub> = 11.74 min.

**HRMS (ESI):** [M+Na]<sup>+</sup> calcd for [C<sub>25</sub>H<sub>24</sub>O<sub>6</sub>Na]: 443.1465, found:443.1466.

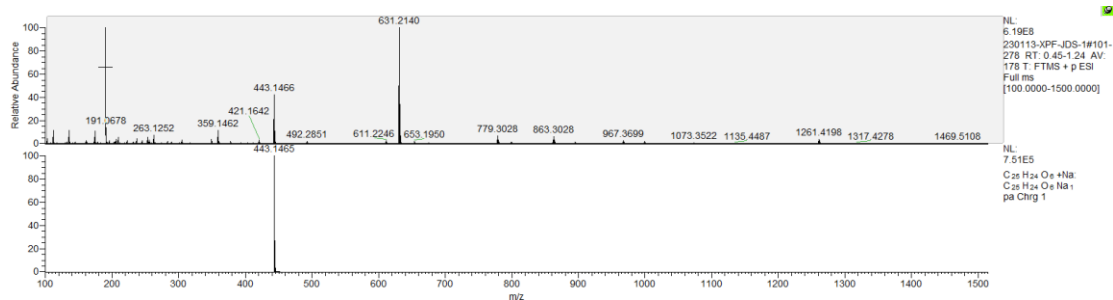

**cyclohexylmethyl** (9S,10R)-6-oxo-10-((E)-styryl)-7,8,9,10-tetrahydro-6H-[1,3]dioxolo[4',5':4,5]benzo[1,2-b]oxocine-9-carboxylate (3ga)

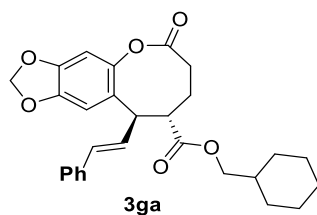

Chemical Formula: C<sub>28</sub>H<sub>30</sub>O<sub>6</sub>

The product was purified by flash column chromatography on silica gel (petroleum ether/ethyl acetate = 10:1) as a colorless oil at room temperature, 69% yield (34mg).  $[\alpha]_D^{19} = +74$  (c 1.0 (10mg/mL), CH<sub>2</sub>Cl<sub>2</sub>, 95 % ee).

<sup>1</sup>H NMR (400 MHz, Chloroform-d)  $\delta$  7.34 – 7.26 (m, 1H), 7.24 – 7.19 (m, 1H), 6.85 (s, 1H), 6.59 (s, 1H), 6.47 – 6.36 (m, 1H), 6.01 – 5.98 (m, 2H), 3.84 – 3.73 (m, 3H), 2.81 (s, 1H), 2.56 (ddd,  $J = 12.2, 8.5, 3.4$  Hz, 1H), 2.33 (ddd,  $J = 12.6, 9.6, 3.5$  Hz, 1H), 2.27 – 2.10 (m, 2H), 1.68 – 1.50 (m, 7H), 1.19 – 1.06 (m, 3H), 0.92 – 0.80 (m, 2H).

<sup>13</sup>C NMR (101 MHz, CDCl<sub>3</sub>)  $\delta$  173.3, 173.0, 147.3, 146.4, 144.4, 136.5, 132.5, 128.5, 127.8, 127.7, 126.7, 126.3, 108.2, 102.3, 102.0, 70.2, 49.5, 44.3, 36.8, 29.64, 29.59, 28.9, 27.4, 26.2, 25.5.

**HPLC:** Chiral Ia-3 column, (*n*-hexane/*i*-PrOH = 80:20), flow rate 1 mL/min, I = 250 nm;  $t_{\text{Retention-major}} = 17.45$  min,  $t_{\text{Retention-minor}} = 11.93$  min.

**HRMS (ESI):** [M+Na]<sup>+</sup> calcd for [C<sub>28</sub>H<sub>30</sub>O<sub>6</sub>Na]: 485.1935, found: 485.1937.

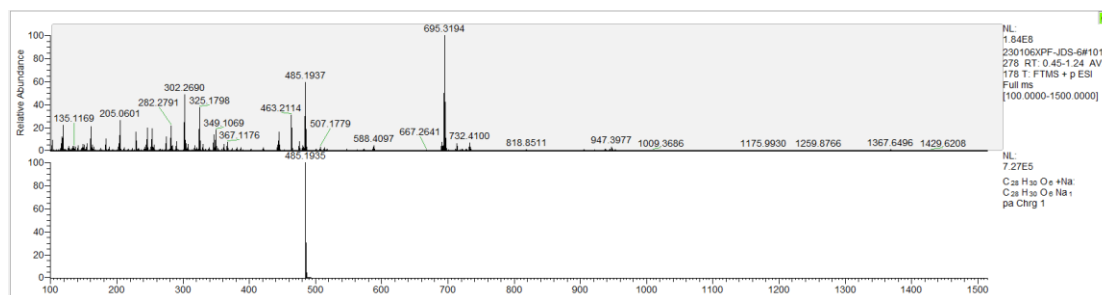

**2-cyclohexylethyl (9S,10R)-6-oxo-10-((E)-styryl)-7,8,9,10-tetrahydro-6H-[1,3]dioxolo[4',5':4,5]benzo[1,2-b]oxocine-9-carboxylate (3ha)**

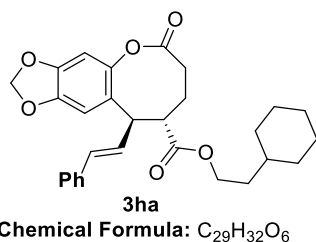

The product was purified by flash column chromatography on silica gel (petroleum ether/ethyl acetate = 10:1-5:1) as a white solid, at room temperature, M. P. = 126-128 °C, 74% yield (35mg).  $[\alpha]_D^{19} = +63$  (c 1.0 (10mg/mL), CH<sub>2</sub>Cl<sub>2</sub>, 96 % ee).

**<sup>1</sup>H NMR** ( 400 MHz, Chloroform-d)  $\delta$  7.39 – 7.25 (m, 4H), 7.21 (t,  $J = 7.0$  Hz, 1H), 6.85 (s, 1H), 6.59 (s, 1H), 6.41 (d,  $J = 9.4$  Hz, 2H), 5.99 (d,  $J = 3.3$  Hz, 2H), 4.03 (t,  $J = 7.0$  Hz, 2H), 3.78 (d,  $J = 8.2$  Hz, 1H), 2.80 (s, 1H), 2.61 – 2.49 (m, 1H), 2.41 – 2.07 (m, 3H), 1.59 (d,  $J = 15.5$  Hz, 5H), 1.41 (d,  $J = 7.0$  Hz, 2H), 1.25 (s, 1H), 1.14 (t,  $J = 13.9$  Hz, 3H), 0.90 – 0.74 (m, 2H).

**<sup>13</sup>C NMR** (101 MHz, CDCl<sub>3</sub>)  $\delta$  173.2, 172.9, 147.3, 146.4, 144.4, 136.5, 132.5, 128.5, 127.8, 127.7, 126.7, 126.3, 107.9, 102.3, 102.0, 63.3, 51.3, 44.9, 35.9, 34.4, 32.95, 32.91, 29.6, 28.9, 26.8, 26.3, 26.03, 26.00.

**HPLC:** Chiral Ia-3 column, (*n*-hexane/*i*-PrOH = 80:20), flow rate 1 mL/min, I = 290 nm;  $t_{\text{Retention-major}} = 16.15$  min,  $t_{\text{Retention-minor}} = 10.71$  min.

**HRMS (ESI):**  $[M+Na]^+$  calcd for [C<sub>29</sub>H<sub>32</sub>O<sub>6</sub>Na]: 499.2091, found:499.2092.

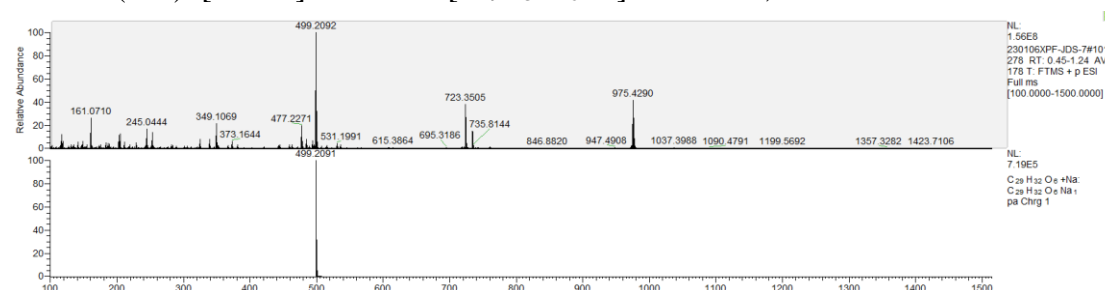

**prop-2-yn-1-yl (9S,10R)-6-oxo-10-((E)-styryl)-7,8,9,10-tetrahydro-6H-[1,3]dioxolo[4',5':4,5]benzo[1,2-b]oxocine-9-carboxylate (3ia)**

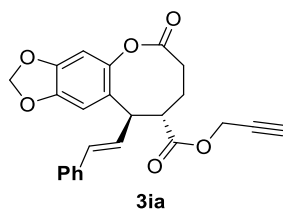

**3ia**  
Chemical Formula: C<sub>24</sub>H<sub>20</sub>O<sub>6</sub>

The product was purified by flash column chromatography on silica gel (petroleum ether/ethyl acetate = 10:1) as a colorless oil at room temperature, 80% yield (34mg).  $[\alpha]_D^{19} = +39$  (c 1.0 (10mg/mL), CH<sub>2</sub>Cl<sub>2</sub>, 99 % ee).

<sup>1</sup>H NMR (400 MHz, Chloroform-d)  $\delta$  7.36 – 7.26 (m, 4H), 7.21 (t, *J* = 7.1 Hz, 1H), 6.88 (s, 1H), 6.59 (s, 1H), 6.51 – 6.38 (m, 2H), 5.99 (d, *J* = 3.8 Hz, 2H), 4.61 (t, *J* = 2.9 Hz, 2H), 3.80 (t, *J* = 8.6 Hz, 1H), 2.86 (t, *J* = 8.1 Hz, 1H), 2.56 (dd, *J* = 11.0, 7.7 Hz, 1H), 2.39 – 2.20 (m, 3H), 2.16 (q, *J* = 5.6 Hz, 1H).

<sup>13</sup>C NMR (101 MHz, CDCl<sub>3</sub>)  $\delta$  172.8, 172.3, 147.5, 146.5, 144.4, 136.5, 132.9, 128.5, 127.7, 127.3, 126.5, 126.3, 107.8, 102.4, 102.1, 77.2, 75.3, 52.2, 50.3, 45.0, 28.7, 27.3.

**HPLC:** Chiral Ia-3 column, (*n*-hexane/*i*-PrOH = 80:20), flow rate 1 mL/min, I = 250 nm; *t*<sub>Retention-major</sub> = 24.22 min, *t*<sub>Retention-minor</sub> = 15.03 min.

**HRMS (ESI):** [M+Na]<sup>+</sup> calcd for [C<sub>24</sub>H<sub>20</sub>O<sub>6</sub>Na]: 427.1152, found:427.1153.

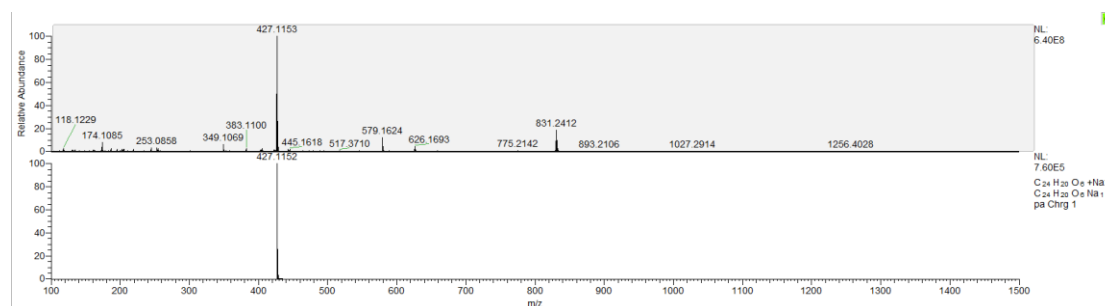

**2,2,2-trifluoroethyl (9S,10R)-6-oxo-10-((E)-styryl)-7,8,9,10-tetrahydro-6H-[1,3]dioxolo[4',5':4,5]benzo[1,2-b]oxocine-9-carboxylate (3ja)**

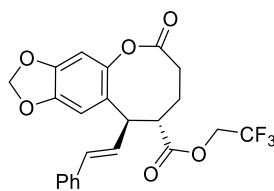

**3ja**  
Chemical Formula: C<sub>23</sub>H<sub>19</sub>F<sub>3</sub>O<sub>6</sub>

The product was purified by flash column chromatography on silica gel (petroleum ether/ethyl acetate = 10:1) as a colorless oil at room temperature, 80% yield (36mg).  $[\alpha]_D^{19} = +36$  (c 1.0 (10mg/mL), CH<sub>2</sub>Cl<sub>2</sub>, 95 % ee).

<sup>1</sup>H NMR (400 MHz, Chloroform-*d*)  $\delta$  7.35 – 7.27 (m, 4H), 7.26 – 7.21 (m, 1H), 6.86 (s, 1H), 6.61 (s, 1H), 6.51 – 6.36 (m, 2H), 6.03 – 5.99 (m, 2H), 4.36 (qq, *J* = 8.3, 4.3

Hz, 2H), 3.79 (t,  $J = 9.0$  Hz, 1H), 2.92 (s, 1H), 2.57 (ddd,  $J = 12.0, 8.4, 3.2$  Hz, 1H), 2.42 – 2.29 (m, 1H), 2.29 – 2.13 (m, 2H).

$^{13}\text{C}$  NMR (101 MHz, Chloroform- $d$ )  $\delta$  172.5, 171.6, 147.6, 146.6, 144.5, 136.2, 133.1, 128.6, 127.9, 126.9, 126.4, 126.1, 124.1, 121.4, 107.7, 102.5, 102.1, 60.7 (q,  $J_{\text{C-F}} = 36.2$  Hz), 50.3, 44.6, 28.8, 26.7.

**HPLC:** Chiral Ia-3 column, ( $n$ -hexane/ $i$ -PrOH = 80:20), flow rate 1 mL/min,  $I = 250$  nm;  $t_{\text{Retention-major}} = 16.34$  min,  $t_{\text{Retention-minor}} = 9.45$  min.

**HRMS (ESI):**  $[\text{M}+\text{Na}]^+$  calcd for  $[\text{C}_{23}\text{H}_{19}\text{F}_3\text{O}_6\text{Na}]$ : 471.1026, found: 471.1028.

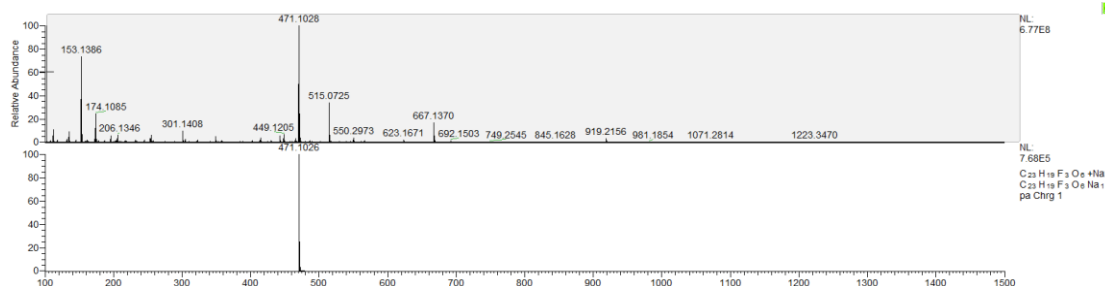

**isopropyl (9S,10R)-6-oxo-10-((E)-styryl)-7,8,9,10-tetrahydro-6H-[1,3]dioxolo[4',5':4,5]benzo[1,2-b]oxocine-9-carboxylate (3ka)**

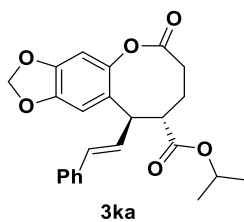

**Chemical Formula:**  $\text{C}_{24}\text{H}_{24}\text{O}_6$

The product was purified by flash column chromatography on silica gel (petroleum ether/ethyl acetate = 10:1) as a colorless oil at room temperature, 82% yield (34mg).  $[\alpha]_{\text{D}}^{19} = +75$  ( $c$  1.0 (10mg/mL),  $\text{CH}_2\text{Cl}_2$ , 98 % ee).

$^1\text{H}$  NMR (400 MHz, Chloroform- $d$ )  $\delta$  7.34 – 7.25 (m, 4H), 7.21 (t,  $J = 6.9$  Hz, 1H), 6.86 (s, 1H), 6.59 (s, 1H), 6.42 (d,  $J = 8.0$  Hz, 2H), 5.99 (d,  $J = 3.5$  Hz, 2H), 4.92 (hept,  $J = 6.3$  Hz, 1H), 3.75 (t,  $J = 8.4$  Hz, 1H), 2.74 (q,  $J = 7.3$  Hz, 1H), 2.54 (ddd,  $J = 12.1, 8.3, 3.3$  Hz, 1H), 2.32 (td,  $J = 12.6, 11.1, 3.4$  Hz, 1H), 2.26 – 2.08 (m, 2H), 1.15 (d,  $J = 6.2$  Hz, 3H), 1.12 (d,  $J = 6.3$  Hz, 3H).

$^{13}\text{C}$  NMR (101 MHz,  $\text{CDCl}_3$ )  $\delta$  173.0, 172.7, 147.3, 146.4, 144.3, 136.5, 132.5, 128.5, 127.9, 127.6, 126.9, 126.3, 107.9, 102.3, 102.0, 68.4, 50.8, 43.9, 29.0, 27.0, 21.8, 21.7.

**HPLC:** Chiral Ia-3 column, ( $n$ -hexane/ $i$ -PrOH = 80:20), flow rate 1 mL/min,  $I = 250$  nm;  $t_{\text{Retention-major}} = 18.08$  min,  $t_{\text{Retention-minor}} = 10.86$  min.



**HRMS (ESI):** [M+H]<sup>+</sup> calcd for [C<sub>24</sub>H<sub>25</sub>O<sub>6</sub>]: 409.1646, found: 409.1642.

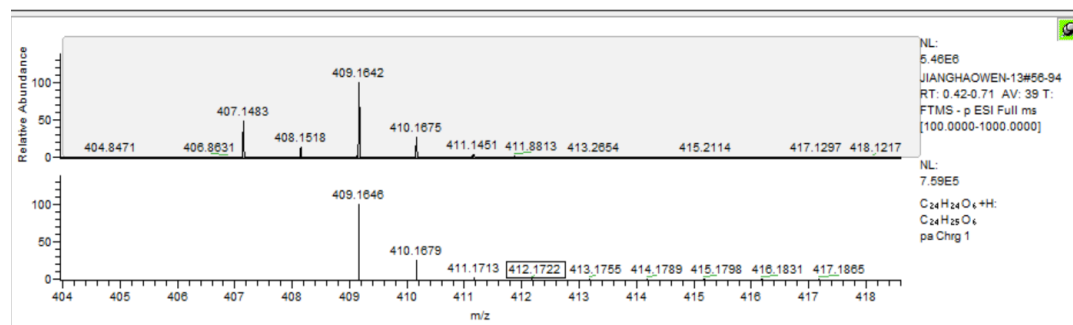

**cycloheptyl (9S,10R)-6-oxo-10-((E)-styryl)-7,8,9,10-tetrahydro-6H-[1,3]dioxolo[4',5':4,5]benzo[1,2-b]oxocine-9-carboxylate (3la)**

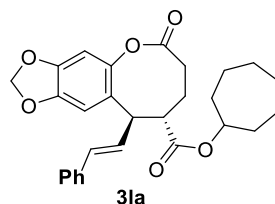

**Chemical Formula:** C<sub>28</sub>H<sub>30</sub>O<sub>6</sub>

The product was purified by flash column chromatography on silica gel (petroleum ether/ethyl acetate = 10:1) as a white solid at room temperature, M. P. = 118-119 °C, 73% yield (36.5mg) [ $\alpha$ ]<sub>D</sub><sup>19</sup> = +42 (*c* 1.0 (10mg/mL), CH<sub>2</sub>Cl<sub>2</sub>, 97 % ee).

<sup>1</sup>H NMR (400 MHz, Chloroform-*d*)  $\delta$  7.34 – 7.25 (m, 4H), 7.24 – 7.18 (m, 1H), 6.86 (s, 1H), 6.59 (s, 1H), 6.48 – 6.34 (m, 2H), 6.02 – 5.95 (m, 2H), 4.85 (tt, *J* = 8.3, 4.6 Hz, 1H), 3.76 (t, *J* = 8.7 Hz, 1H), 2.75 (s, 1H), 2.54 (ddd, *J* = 12.3, 8.5, 3.5 Hz, 1H), 2.32 (ddd, *J* = 12.7, 9.5, 3.6 Hz, 1H), 2.26 – 2.06 (m, 2H), 1.76 (qd, *J* = 9.2, 7.2, 3.5 Hz, 2H), 1.62 – 1.43 (m, 8H), 1.35 – 1.25 (m, 2H).

<sup>13</sup>C NMR (101 MHz, Chloroform-*d*)  $\delta$  173.0, 172.5, 147.3, 146.4, 144.3, 136.5, 132.5, 128.5, 127.9, 127.7, 127.0, 126.3, 107.8, 102.3, 102.0, 75.9, 50.9, 44.0, 33.8, 33.6, 29.0, 28.22, 28.21, 27.0, 22.69, 22.67.

**HPLC:** Chiral Ia-3 column, (n-hexane/*i*-PrOH = 80:20), flow rate 1 mL/min, I = 254 nm; *t*<sub>Retention-major</sub> = 18.31 min, *t*<sub>Retention-minor</sub> = 13.95 min.

**HRMS (ESI):**  $[M+Na]^+$  calcd for  $[C_{28}H_{30}O_6Na]$ : 485.1935, found:485.1938.

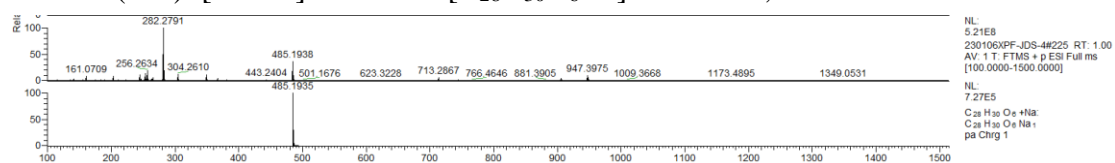

**tert-butyl (9S,10R)-6-oxo-10-((E)-styryl)-7,8,9,10-tetrahydro-6H-[1,3]dioxolo[4',5':4,5]benzo[1,2-b]oxocine-9-carboxylate (3ma)**

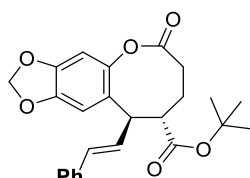

**3ma**  
Chemical Formula:  $C_{25}H_{26}O_6$

The product was purified by flash column chromatography on silica gel (petroleum ether/ethyl acetate = 10:1) as a colorless oil at room temperature, 81% yield (34mg).  $[\alpha]_D^{19} = +90$  (*c* 1.0 (10mg/mL),  $CH_2Cl_2$ , 98 % ee).

**$^1H$  NMR** (400 MHz, Chloroform- $d$ )  $\delta$  7.29 (dd,  $J = 13.9, 6.7$  Hz, 4H), 7.25 – 7.17 (m, 1H), 6.85 (s, 1H), 6.58 (s, 1H), 6.43 (d,  $J = 6.0$  Hz, 2H), 5.98 (d,  $J = 3.9$  Hz, 2H), 3.73 (t,  $J = 8.3$  Hz, 1H), 2.66 (d,  $J = 8.5$  Hz, 1H), 2.53 (dd,  $J = 20.2, 4.7$  Hz, 1H), 2.31 (ddd,  $J = 13.0, 8.1, 4.9$  Hz, 1H), 2.14 (dq,  $J = 10.3, 6.1, 5.6$  Hz, 2H), 1.35 (s, 9H).

**$^{13}C$  NMR** (101 MHz,  $CDCl_3$ )  $\delta$  173.0, 172.4, 147.2, 146.4, 144.3, 136.5, 132.3, 128.5, 128.3, 127.6, 127.1, 126.3, 108.0, 102.3, 102.0, 81.3, 51.6, 43.7, 29.0, 28.0, 26.7.

**HPLC:** Chiral Ia-3 column, (n-hexane/i-PrOH = 80:20), flow rate 1 mL/min,  $I = 250$  nm;  $t_{Reten-major} = 12.46$  min,  $t_{Reten-minor} = 7.96$  min.

**HRMS (ESI):**  $[M+Na]^+$  calcd for  $[C_{25}H_{26}O_6Na]$ : 445.1622, found:445.1622

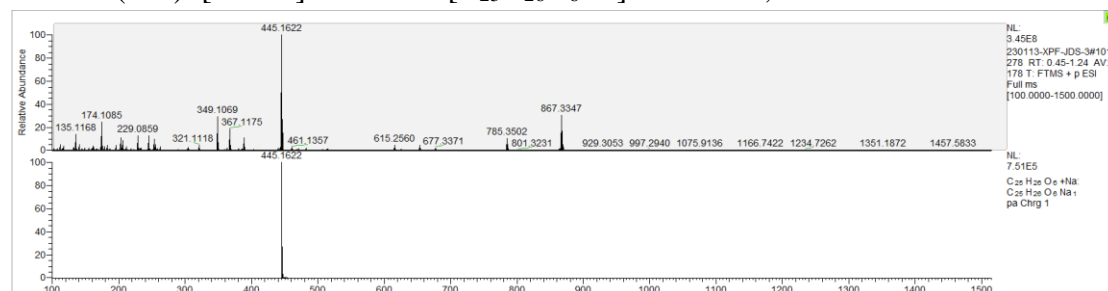

**(9S,10R)-6-oxo-N-phenyl-10-((E)-styryl)-7,8,9,10-tetrahydro-6H-[1,3]dioxolo[4',5':4,5]benzo[1,2-b]oxocine-9-carboxamide (3na)**

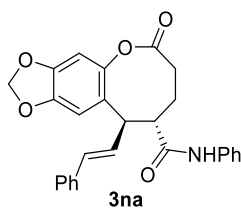

Chemical Formula: C<sub>27</sub>H<sub>23</sub>NO<sub>5</sub>

3na was obtained on a scale-up reaction: In a 50 ml round-bottomed flasks were successively added Cat-1 (0.01 mmol), cyclobutanone carbonamide 1n (3.9 mmol, 0.73g), ortho-quinone methides 2a (3 mmol, 0.75g), then 30 mL dry DCM added by syringe and the reaction mixture was stirred at 20 °C for approximately 48 h and monitored by thin layer chromatography, when TLC analysis showed ortho-quinone methides 2 was mainly consumed, the solvent was evaporated under reduced pressure and the residue was purified by flash column chromatography on silica gel (petroleum ether/ethyl acetate = 2:1 to 1:1) to give the enantioenriched 8-membered lactone 3na as yellow solid. M. P. = 130-133 °C, 82% yield (1.12 g).  $[\alpha]_D^{23} = +54$  (*c* 1.0 (10mg/mL), CH<sub>2</sub>Cl<sub>2</sub>, 92 % ee). **Attention:** This compound was not stable on silica gel column chromatography, so the quickly column chromatography is necessary. Moreover, the solubility of this compound in CDCl<sub>3</sub> was poor, the CD<sub>2</sub>Cl<sub>2</sub> was used for NMR testing.

**<sup>1</sup>H NMR** (600 MHz, Methylene Chloride-*d*<sub>2</sub>) δ 7.76 (s, 1H), 7.45 (d, *J* = 7.9 Hz, 2H), 7.31 – 7.18 (m, 6H), 7.08 (t, *J* = 7.4 Hz, 1H), 6.87 (s, 1H), 6.60 (d, *J* = 32.7 Hz, 1H), 6.43 (d, *J* = 15.2 Hz, 2H), 5.99 (s, 2H), 3.92 (s, 1H), 2.79 (s, 1H), 2.59 (dt, *J* = 13.4, 7.5 Hz, 1H), 2.46 – 2.32 (m, 1H), 2.15 (p, *J* = 11.4, 8.7 Hz, 2H).

**<sup>13</sup>C NMR** (101 MHz, Methylene Chloride-*d*<sub>2</sub>) δ 173.4, 171.9, 148.0, 146.8, 145.2, 138.1, 137.1, 132.4, 129.2, 128.8, 127.9, 127.4, 126.6, 124.8, 120.7, 108.9, 103.0, 102.7, 29.9, 27.3.

**HPLC:** Chiral OD-H column, (*n*-hexane/*i*-PrOH = 80:20), I = 250 nm, *t*<sub>Retention-major</sub> = 19.21 min, *t*<sub>Retention-minor</sub> = 13.36 min.

**HRMS (ESI):** [M+Na]<sup>+</sup> calcd for [C<sub>27</sub>H<sub>23</sub>NO<sub>5</sub>Na]: 464.1468, found: 464.1472.

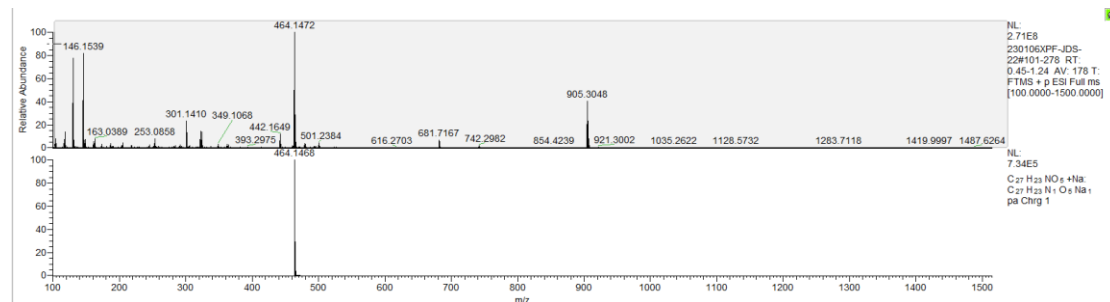

**(9S,10R)-6-oxo-10-((E)-styryl)-N-(p-tolyl)-7,8,9,10-tetrahydro-6H-[1,3]dioxolo[4',5':4,5]benzo[1,2-b]oxocine-9-carboxamide (30a)**

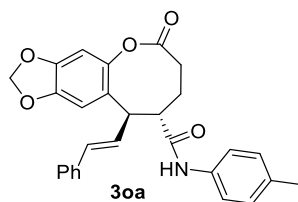

Chemical Formula:  $C_{28}H_{25}NO_5$

30a was synthesized according to the general procedure the synthesis of 8-membered lactone but the reaction time was prolonged to hours. 30a was purified by flash column chromatography on silica gel (petroleum ether/ethyl acetate = 3:1 to 2:1 to 1:1) as a yellow solid at room temperature, M. P. = 205-208 °C, 77% yield (36mg).  $[\alpha]_D^{23} = +53$  (*c* 1.0 (10mg/mL),  $CH_2Cl_2$ , 94 % ee). **Attention:** This compound was not stable on silica gel column chromatography, so the quickly column chromatography is necessary. Moreover, the solubility of this compound in  $CDCl_3$  was poor, the  $CD_2Cl_2$  was used for NMR testing.

**$^1H$  NMR** (400 MHz, Methylene Chloride- $d_2$ )  $\delta$  7.49 (s, 1H), 7.34 – 7.27 (m, 2H), 7.28 – 7.19 (m, 4H), 7.19 – 7.14 (m, 1H), 7.07 (d,  $J = 8.1$  Hz, 2H), 6.86 (s, 1H), 6.59 (s, 1H), 6.47 – 6.33 (m, 2H), 6.00 (s, 2H), 3.90 (t,  $J = 7.9$  Hz, 1H), 2.72 (s, 1H), 2.59 (dt,  $J = 13.5, 7.4$  Hz, 1H), 2.38 (dt,  $J = 12.9, 6.3$  Hz, 1H), 2.27 (s, 3H), 2.20 – 2.06 (m, 2H).

**$^{13}C$  NMR** (101 MHz, Methylene Chloride- $d_2$ )  $\delta$  173.4, 171.8, 147.9, 146.8, 145.2, 137.1, 135.4, 134.7, 132.3, 129.7, 128.8, 127.9, 127.5, 126.7, 120.8, 108.8, 103.0, 102.7, 30.1, 27.3, 20.9.

**HPLC:** Chiral OD-H column, (*n*-hexane/*i*-PrOH = 80:20) ,  $I = 250$  nm, flow rate 1 mL/min;  $t_{Reten-major} = 28.85$  min,  $t_{Reten-minor} = 39.22$  min.

**HRMS (ESI):**  $[M+Na]^+$  calcd for  $[C_{28}H_{25}NO_5Na]$ : 478.1625, found:478.1627.

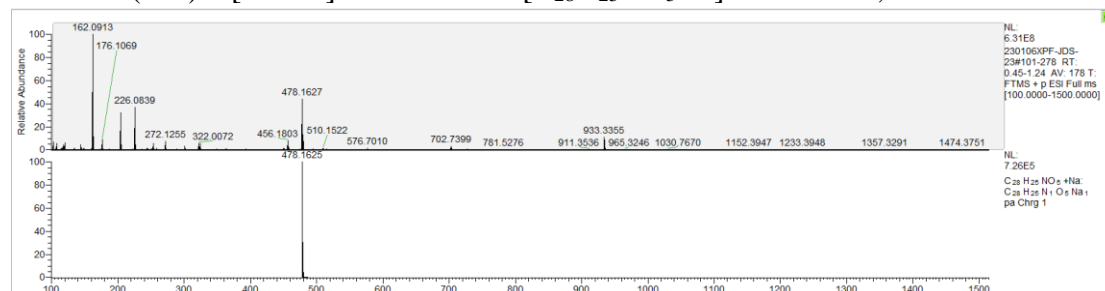

**benzyl (9S,10R)-10-((E)-4-fluorostyryl)-6-oxo-7,8,9,10-tetrahydro-6H-[1,3]dioxolo[4',5':4,5]benzo[1,2-b]oxocine-9-carboxylate (3ab)**

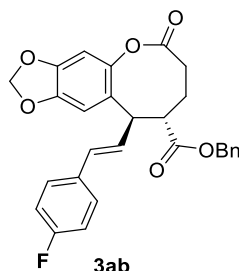

**Chemical Formula:** C<sub>28</sub>H<sub>23</sub>FO<sub>6</sub>

The product was purified by flash column chromatography on silica gel (petroleum ether/ethyl acetate = 10:1) as a colorless oil at room temperature, 77% yield (34mg).

$[\alpha]_D^{19} = +47$  (*c* 1.0 (10mg/mL), CH<sub>2</sub>Cl<sub>2</sub>, 96 % ee).

**<sup>1</sup>H NMR** (400 MHz, Chloroform-d)  $\delta$  7.32 – 7.14 (m, 7H), 6.96 (t, *J* = 8.7 Hz, 2H), 6.80 (s, 1H), 6.58 (s, 1H), 6.39 – 6.24 (m, 2H), 5.99 (d, *J* = 1.8 Hz, 2H), 5.02 (d, *J* = 2.6 Hz, 2H), 3.77 (t, *J* = 8.7 Hz, 1H), 2.85 (s, 1H), 2.55 (ddd, *J* = 11.8, 8.4, 3.0 Hz, 1H), 2.38 – 2.11 (m, 3H).

**<sup>13</sup>C NMR** (101 MHz, CDCl<sub>3</sub>)  $\delta$  173.0, 172.8, 162.2 (d, *J*<sub>C-F</sub> = 247.4 Hz), 147.4 (d, *J*<sub>C-F</sub> = 3.0 Hz), 144.4, 135.2, 132.6 (d, *J*<sub>C-F</sub> = 3 Hz), 131.4, 128.6, 128.5, 128.4, 127.9 (d, *J*<sub>C-F</sub> = 8.1 Hz), 127.4, 126.4, 115.5, 115.3, 107.8, 102.4, 102.1, 66.8, 50.8, 43.9, 28.8, 26.2.

**HPLC:** Chiral Ia-3 column, (*n*-hexane/*i*-PrOH = 80:20), flow rate 1 mL/min,  $\lambda = 250$  nm;  $t_{\text{Retention-major}} = 26.87$  min,  $t_{\text{Retention-minor}} = 18.77$  min.

**HRMS (ESI):** [M+Na]<sup>+</sup> calcd for [C<sub>28</sub>H<sub>23</sub>O<sub>6</sub>FN]<sub>a</sub>: 497.1371, found:497.1376.

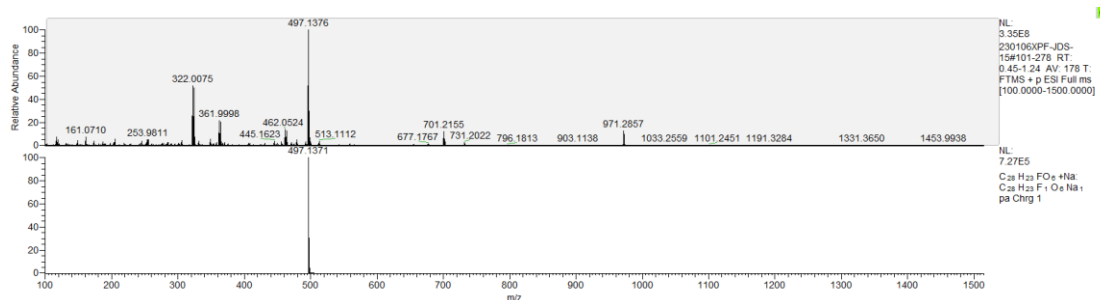

benzyl (9S,10R)-10-((E)-4-chlorostyryl)-6-oxo-7,8,9,10-tetrahydro-6H-[1,3]dioxolo[4',5':4,5]benzo[1,2-b]oxocine-9-carboxylate(3ac)

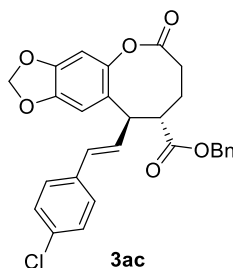

Chemical Formula: C<sub>28</sub>H<sub>23</sub>ClO<sub>6</sub>

The product was purified by flash column chromatography on silica gel (petroleum ether/ethyl acetate = 10:1) as a colorless oil at room temperature, 79% yield (39mg).

$[\alpha]_D^{19} = +28$  (*c* 1.0 (10mg/mL), CH<sub>2</sub>Cl<sub>2</sub>, 96 % ee).

<sup>1</sup>H NMR (400 MHz, Chloroform-d) δ 7.31 – 7.20 (m, 7H), 7.15 (d, *J* = 8.3 Hz, 2H), 6.79 (s, 1H), 6.58 (s, 1H), 6.34 (d, *J* = 4.0 Hz, 2H), 5.99 (d, *J* = 1.6 Hz, 2H), 5.02 (d, *J* = 2.4 Hz, 2H), 3.77 (s, 1H), 2.80 (s, 1H), 2.55 (t, *J* = 9.1 Hz, 1H), 2.37 – 2.11 (m, 3H).

<sup>13</sup>C NMR (101 MHz, CDCl<sub>3</sub>) δ 172.9, 172.8, 147.5, 146.5, 144.4, 135.1, 134.9, 133.3, 131.3, 128.6, 128.5, 128.48, 127.6, 126.2, 107.0, 102.4, 102.1, 66.9, 51.1, 43.8, 28.8, 26.7.

HPLC: Chiral Ia-3 column, (*n*-hexane/*i*-PrOH = 80:20), flow rate 1 mL/min, I = 250 nm; *t*<sub>Retention-major</sub> = 28.16 min, *t*<sub>Retention-minor</sub> = 20.54 min.

HRMS (ESI): [M+Na]<sup>+</sup> calcd for [C<sub>28</sub>H<sub>23</sub>O<sub>6</sub>ClNa]: 513.1075, found: 513.1081.

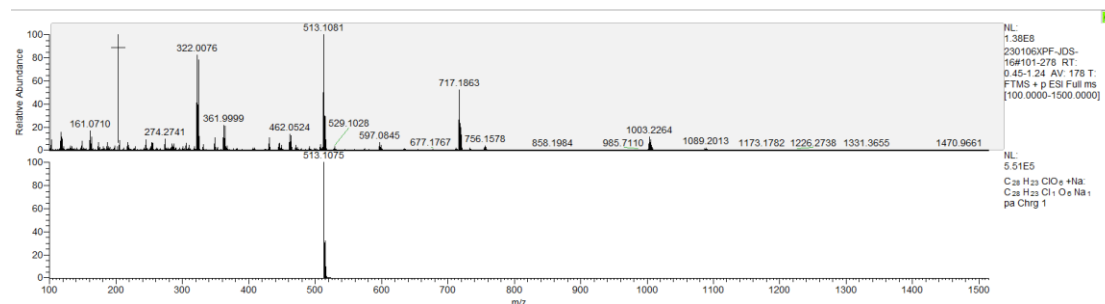

benzyl (9S,10R)-10-((E)-4-bromostyryl)-6-oxo-7,8,9,10-tetrahydro-6H-[1,3]dioxolo[4',5':4,5]benzo[1,2-b]oxocine-9-carboxylate (3ad)

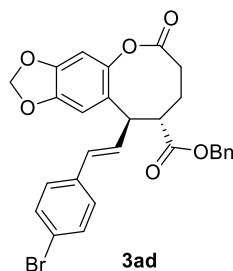

Chemical Formula: C<sub>28</sub>H<sub>23</sub>BrO<sub>6</sub>

The product was purified by flash column chromatography on silica gel (petroleum ether/ethyl acetate = 10:1) as a colorless oil at room temperature, 78% yield (41mg).

$[\alpha]_D^{19} = +35$  (*c* 1.0 (10mg/mL), CH<sub>2</sub>Cl<sub>2</sub>, 97 % ee).

**<sup>1</sup>H NMR** (400 MHz, Chloroform-d)  $\delta$  7.38 (d, *J* = 8.1 Hz, 2H), 7.33 – 7.20 (m, 5H), 7.09 (d, *J* = 6.7 Hz, 2H), 6.79 (s, 1H), 6.58 (s, 1H), 6.34 (d, *J* = 6.9 Hz, 2H), 5.99 (s, 2H), 5.02 (s, 2H), 3.78 (d, *J* = 8.5 Hz, 1H), 2.85 (s, 1H), 2.55 (ddd, *J* = 12.0, 8.4, 3.1 Hz, 1H), 2.40 – 2.11 (m, 3H).

**<sup>13</sup>C NMR** (101 MHz, CDCl<sub>3</sub>)  $\delta$  172.9, 172.8, 147.5, 146.5, 144.4, 135.4, 135.1, 131.6, 131.4, 128.6, 128.5, 128.4, 127.9, 126.2, 121.5, 107.0, 102.4, 102.1, 68.0, 50.0, 44.4, 30.2, 26.1.

**HPLC**: Chiral Ia-3 column, (*n*-hexane/*i*-PrOH = 80:20), flow rate 1 mL/min, I = 250 nm; *t*<sub>Retention-major</sub> = 31.39 min, *t*<sub>Retention-minor</sub> = 22.57 min.

**HRMS** (ESI): [M+Na]<sup>+</sup> calcd for [C<sub>28</sub>H<sub>23</sub>O<sub>6</sub>BrNa]: 557.0570, 559.0550, found: 557.0573, 559.0550.

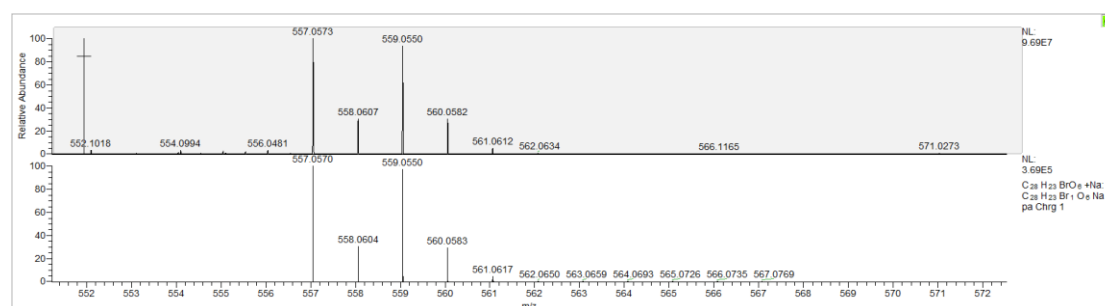

benzyl (9S,10R)-10-((E)-4-methylstyryl)-6-oxo-7,8,9,10-tetrahydro-6H-[1,3]dioxolo[4',5':4,5]benzo[1,2-b]oxocine-9-carboxylate (3ae)

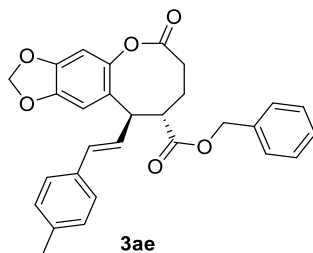

Chemical Formula: C<sub>29</sub>H<sub>26</sub>O<sub>6</sub>

The product was purified by flash column chromatography on silica gel (petroleum ether/ethyl acetate = 10:1) as a yellow solid at room temperature, M. P. = 52-53°C, 81% yield (38mg).  $[\alpha]_D^{19} = +37$  (*c* 1.0 (10mg/mL), CH<sub>2</sub>Cl<sub>2</sub>, 98 % ee).

<sup>1</sup>H NMR (400 MHz, Chloroform-d) δ 7.29 (dd, *J* = 5.1, 2.2 Hz, 3H), 7.26 – 7.22 (m, 2H), 7.17 (d, *J* = 8.2 Hz, 2H), 7.09 (d, *J* = 7.9 Hz, 2H), 6.82 (s, 1H), 6.57 (s, 1H), 6.41 – 6.30 (m, 2H), 6.01 – 5.95 (m, 2H), 5.01 (s, 2H), 3.76 (t, *J* = 8.2 Hz, 1H), 2.82 (d, *J* = 10.5 Hz, 1H), 2.54 (dd, *J* = 10.7, 7.4 Hz, 1H), 2.33 (s, 3H), 2.26 (dd, *J* = 24.0, 2.7 Hz, 2H), 2.18 – 2.11 (m, 1H).

<sup>13</sup>C NMR (101 MHz, CDCl<sub>3</sub>) δ 173.0, 172.9, 147.3, 146.4, 144.3, 137.6, 135.2, 133.7, 132.5, 129.2, 128.53, 128.48, 128.4, 128.3, 126.6, 126.3, 107.9, 102.3, 102.0, 66.8, 50.4, 43.7, 28.8, 26.8, 21.2.

HPLC: Chiral Ia-3 column, (*n*-hexane/*i*-PrOH = 80:20), flow rate 1 mL/min, I = 250 nm; *t*<sub>Retention-major</sub> = 24.65 min, *t*<sub>Retention-minor</sub> = 17.37 min.

HRMS (ESI): [M+Na]<sup>+</sup> calcd for [C<sub>29</sub>H<sub>26</sub>O<sub>6</sub>Na]:493.1622, found: 493.1625.

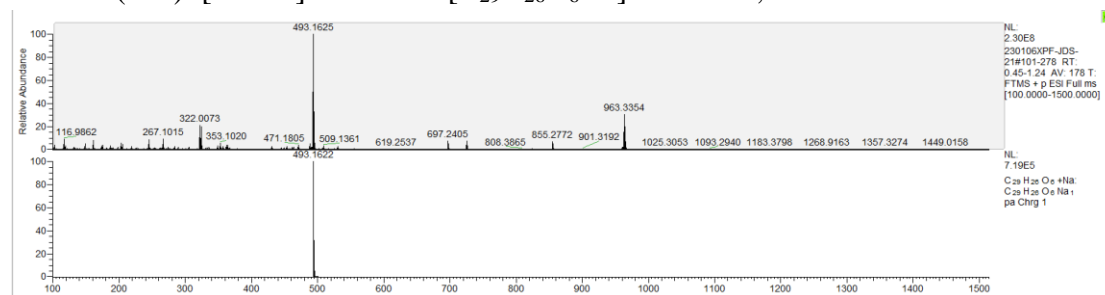



benzyl (9S,10R)-10-((E)-4-methoxystyryl)-6-oxo-7,8,9,10-tetrahydro-6H-[1,3]dioxolo[4',5':4,5]benzo[1,2-b]oxocine-9-carboxylate (3af)

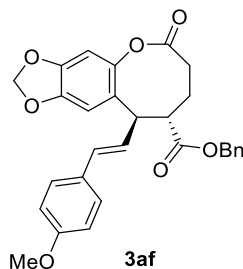

Chemical Formula: C<sub>29</sub>H<sub>26</sub>O<sub>7</sub>

The product was purified by flash column chromatography on silica gel (petroleum ether/ethyl acetate = 10:1) as a white solid at room temperature, M. P. = 37-38°C, 76% yield (40mg).  $[\alpha]_D^{19} = 35$  (c 1.0 (10mg/mL), CH<sub>2</sub>Cl<sub>2</sub>, 98 % ee).

<sup>1</sup>H NMR (400 MHz, Chloroform-d) δ 7.31 – 7.18 (m, 7H), 6.84 – 6.79 (m, 3H), 6.58 (s, 1H), 6.38 – 6.21 (m, 2H), 5.98 (q, *J* = 1.4 Hz, 2H), 5.01 (s, 2H), 3.80 (s, 3H), 3.78 – 3.71 (m, 1H), 2.83 (s, 1H), 2.54 (dd, *J* = 10.9, 7.5 Hz, 1H), 2.35 – 2.11 (m, 3H).

<sup>13</sup>C NMR (101 MHz, CDCl<sub>3</sub>) δ 173.1, 172.9, 159.3, 147.3, 146.4, 144.3, 135.2, 132.0, 129.2, 128.6, 128.5, 128.3, 127.6, 126.8, 125.4, 113.9, 107.9, 102.3, 102.0, 66.8, 55.3, 52.0, 44.5, 28.9, 26.6.

**HPLC:** Chiral Ia-3 column, (n-hexane/i-PrOH = 80:20), flow rate 1 mL/min, I = 290 nm; *t*<sub>Retention-major</sub> = 37.23 min, *t*<sub>Retention-minor</sub> = 24.78 min.

**HRMS (ESI):** [M+Na]<sup>+</sup> calcd for [C<sub>29</sub>H<sub>26</sub>O<sub>7</sub>Na]:509.1571, found: 509.1577.

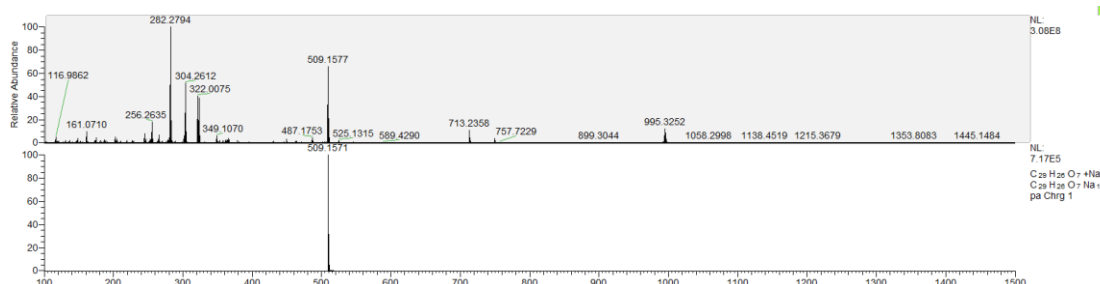

**benzyl (9S,10R)-10-((E)-3-methoxystyryl)-6-oxo-7,8,9,10-tetrahydro-6H-[1,3]dioxolo[4',5':4,5]benzo[1,2-b]oxocine-9-carboxylate (3ag)**

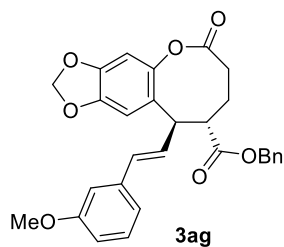

Chemical Formula: C<sub>29</sub>H<sub>26</sub>O<sub>7</sub>

The product was purified by flash column chromatography on silica gel (petroleum ether/ethyl acetate = 10:1) as a yellow solid at room temperature, M. P. = 36-38°C, 80% yield (39.8mg).  $[\alpha]_D^{19} = +46$  (c 1.0 (10mg/mL), CH<sub>2</sub>Cl<sub>2</sub>, 97 % ee).

**<sup>1</sup>H NMR** (400 MHz, Chloroform-d)  $\delta$  7.30 – 7.17 (m, 6H), 6.87 (d,  $J = 6.5$  Hz, 1H), 6.84 – 6.76 (m, 3H), 6.58 (s, 1H), 6.42 – 6.33 (m, 2H), 5.98 (q,  $J = 1.4$  Hz, 2H), 5.02 (s, 2H), 3.79 (s, 4H), 2.85 (s, 1H), 2.54 (ddd,  $J = 11.6, 8.4, 2.9$  Hz, 1H), 2.38 – 2.08 (m, 3H).

**<sup>13</sup>C NMR** (101 MHz, CDCl<sub>3</sub>)  $\delta$  173.0, 172.8, 159.7, 147.7, 146.4, 144.4, 137.9, 135.2, 132.5, 129.5, 128.53, 128.48, 128.3, 128.0, 126.5, 119.0, 113.4, 111.0, 108.1, 102.4, 102.0, 66.9, 55.2, 50.3, 43.9, 28.9, 26.3.

**HPLC:** Chiral Ia-3 column, (n-hexane/i-PrOH = 80:20), flow rate 1 mL/min, I = 250 nm;  $t_{\text{Reten-major}} = 32.20$  min,  $t_{\text{Reten-minor}} = 18.48$  min.

**HRMS (ESI):**  $[M+Na]^+$  calcd for [C<sub>29</sub>H<sub>26</sub>O<sub>7</sub>Na]: 509.1571, found:509.1577.

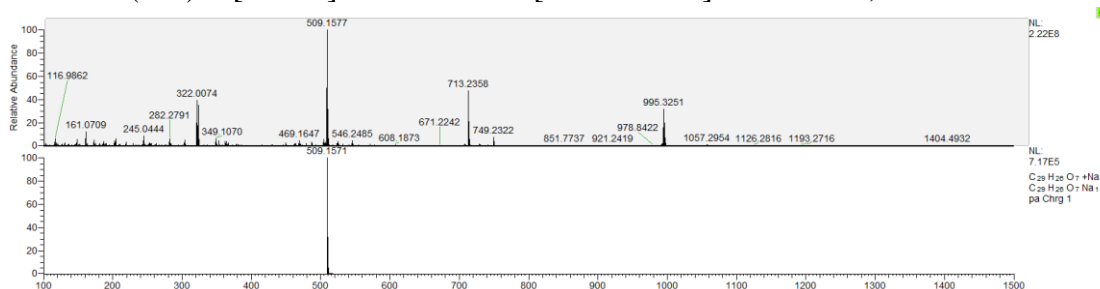

benzyl (9S,10R)-10-((E)-2-methoxystyryl)-6-oxo-7,8,9,10-tetrahydro-6H-[1,3]dioxolo[4',5':4,5]benzo[1,2-b]oxocine-9-carboxylate (3ah)

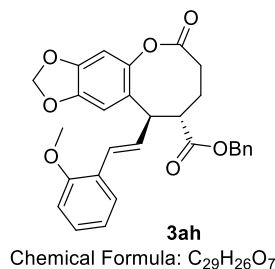

The product was purified by flash column chromatography on silica gel (petroleum ether/ethyl acetate = 10:1) as a white solid at room temperature, M. P. = 106-107 °C, 68% yield (34mg).  $[\alpha]_D^{19} = +57$  (*c* 1.0 (10mg/mL), CH<sub>2</sub>Cl<sub>2</sub>, 92 % ee).

<sup>1</sup>H NMR (400 MHz, Chloroform-d) δ 7.35 – 7.19 (m, 7H), 6.91 – 6.72 (m, 4H), 6.58 (s, 1H), 6.43 (dd, *J* = 15.8, 9.1 Hz, 1H), 6.00 – 5.96 (m, 2H), 5.07 – 4.97 (m, 2H), 3.79 (s, 4H), 2.85 (s, 1H), 2.55 (dd, *J* = 11.0, 8.3 Hz, 1H), 2.36 – 2.11 (m, 3H).

<sup>13</sup>C NMR (101 MHz, CDCl<sub>3</sub>) δ 173.0, 172.9, 156.7, 147.3, 146.4, 144.5, 135.4, 128.7, 128.5, 128.4, 128.25, 128.15, 127.6, 126.9, 125.6, 120.6, 110.7, 108.1, 102.3, 102.0, 66.8, 55.3, 50.7, 45.0, 28.9, 26.7.

HPLC: Chiral Ia-3 column, (n-hexane/*i*-PrOH = 80:20), flow rate 1 mL/min, I = 250 nm; *t*<sub>Retention-major</sub> = 27.24 min, *t*<sub>Retention-minor</sub> = 14.82 min.

HRMS (ESI): [M+Na]<sup>+</sup> calcd for [C<sub>29</sub>H<sub>26</sub>O<sub>7</sub>Na]: 509.1571, found: 509.1578.

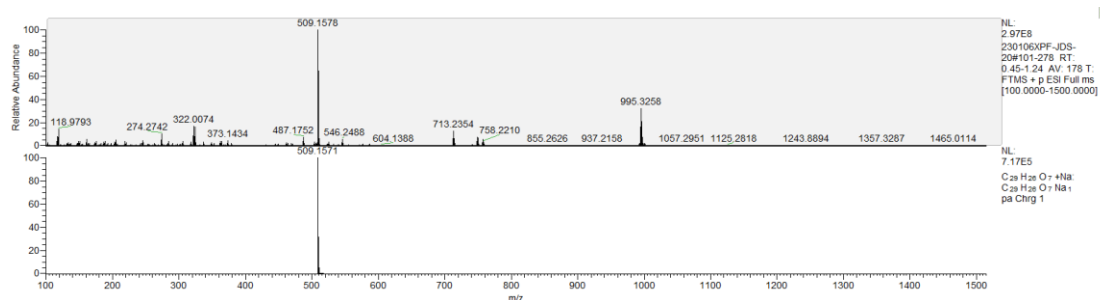

benzyl (9S,10R)-10-((E)-2-methylstyryl)-6-oxo-7,8,9,10-tetrahydro-6H-[1,3]dioxolo[4',5':4,5]benzo[1,2-b]oxocine-9-carboxylate(3ai)

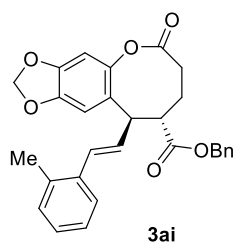

The product was purified by flash column chromatography on silica gel (petroleum ether/ethyl acetate = 5:1) as oil at room temperature, 72% yield (28 mg).  $[\alpha]_D^{23.3} = +32$  (*c* 1.0 (10mg/mL), CH<sub>2</sub>Cl<sub>2</sub>, 98 % ee).

<sup>1</sup>H NMR (600 MHz, Chloroform-*d*)  $\delta$  7.32 (d, *J* = 1.9 Hz, 1H), 7.28 – 7.23 (m, 3H), 7.21 (dd, *J* = 7.9, 1.8 Hz, 2H), 7.13 (dtd, *J* = 15.3, 7.6, 5.7 Hz, 3H), 6.83 (s, 1H), 6.62 (d, *J* = 15.5 Hz, 1H), 6.59 (s, 1H), 6.27 (dd, *J* = 15.5, 9.0 Hz, 1H), 5.98 (q, *J* = 1.4 Hz, 2H), 5.02 (d, *J* = 3.3 Hz, 2H), 3.82 (d, *J* = 9.5 Hz, 1H), 2.85 (s, 1H), 2.55 (ddd, *J* = 11.6, 8.6, 2.6 Hz, 1H), 2.35 – 2.26 (m, 2H), 2.24 (s, 3H), 2.15 (dddd, *J* = 14.5, 8.0, 6.1, 3.5 Hz, 1H).

<sup>13</sup>C NMR (151 MHz, CDCl<sub>3</sub>)  $\delta$  172.99, 172.86, 147.39, 146.51, 144.44, 135.70, 135.56, 135.23, 130.61, 130.21, 129.01, 128.53, 128.44, 128.35, 127.64, 126.02, 125.69, 107.92, 102.36, 102.05, 66.87, 51.21, 44.36, 28.90, 26.87, 19.77.

HPLC: Chiral Ia-3 column, (n-hexane/i-PrOH = 80:20), flow rate 1 mL/min,  $\lambda = 250$  nm;  $t_{\text{Retention-major}} = 16.44$  min,  $t_{\text{Retention-minor}} = 10.75$  min.

HRMS (ESI):  $[M+H]^+$  calcd for [C<sub>29</sub>H<sub>27</sub>O<sub>6</sub>]: 471.1802, found: 471.1804.

**benzyl (9S,10R)-10-((E)-2-(naphthalen-1-yl)vinyl)-6-oxo-7,8,9,10-tetrahydro-6H-[1,3]dioxolo[4',5':4,5]benzo[1,2-b]oxocine-9-carboxylate (3aj)**

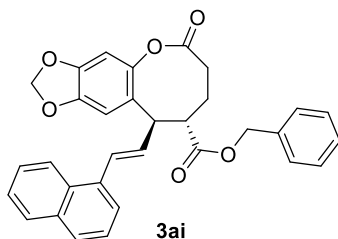

Chemical Formula: C<sub>32</sub>H<sub>26</sub>O<sub>6</sub>

The product was purified by flash column chromatography on silica gel (petroleum ether/ethyl acetate = 10:1) as a colorless oil at room temperature, 67% yield (35mg).  $[\alpha]_D^{19} = +60$  (*c* 0.5 (5mg/mL), CH<sub>2</sub>Cl<sub>2</sub>, 96 % ee).

<sup>1</sup>H NMR (400 MHz, Chloroform-*d*)  $\delta$  8.02 – 7.95 (m, 1H), 7.83 (dt, *J* = 7.9, 2.8 Hz, 1H), 7.77 (d, *J* = 8.1 Hz, 1H), 7.52 – 7.44 (m, 3H), 7.41 (d, *J* = 7.8 Hz, 1H), 7.22 – 7.14 (m, 6H), 6.89 (s, 1H), 6.62 (s, 1H), 6.42 (dd, *J* = 15.4, 9.0 Hz, 1H), 6.00 (q, *J* = 1.4 Hz, 2H), 5.00 (q, *J* = 12.1 Hz, 2H), 3.93 (t, *J* = 9.0 Hz, 1H), 2.90 (s, 1H), 2.58 (t, *J* = 9.2 Hz, 1H), 2.41 – 2.27 (m, 2H), 2.20 (ddd, *J* = 11.5, 8.9, 5.2 Hz, 1H).

<sup>13</sup>C NMR (101 MHz, Chloroform-*d*)  $\delta$  173.0, 172.9, 147.4, 146.6, 145.0, 135.1, 134.3, 133.5, 131.0, 130.8, 130.1, 128.5, 128.43, 128.41, 128.3, 128.1, 126.1, 125.8, 125.5, 123.9, 123.8, 107.8, 103.2, 102.1, 66.9, 50.9, 44.1, 28.9, 26.3.

**HPLC:** Chiral Ia-3 column, (n-hexane/i-PrOH = 80:20), flow rate 1 mL/min, I = 290 nm;  $t_{\text{Reten-major}} = 21.45$  min,  $t_{\text{Reten-minor}} = 14.71$  min.

**HRMS (ESI):**  $[M+H]^+$  calcd for  $[C_{32}H_{27}O_6]$ : 507.1798, found: 507.1802.

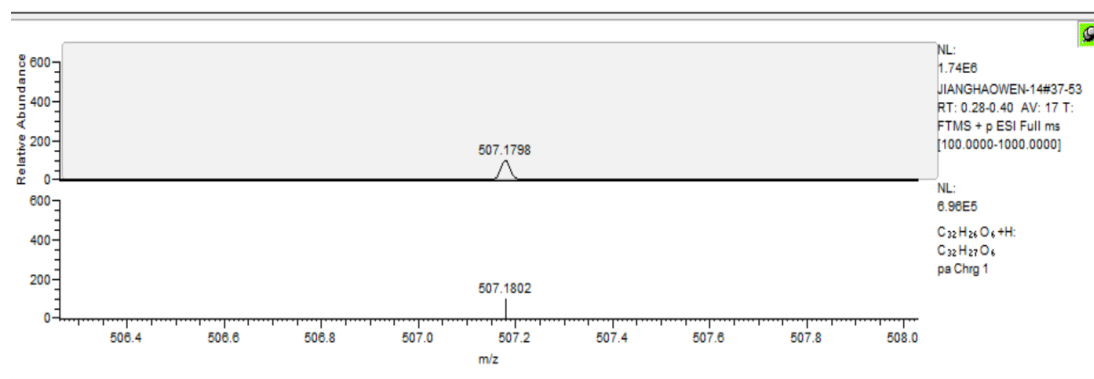

**(1-tosyl-1H-1,2,3-triazol-4-yl)methyl (9S,10R)-6-oxo-10-((E)-styryl)-7,8,9,10-tetrahydro-6H-[1,3]dioxolo[4',5':4,5]benzo[1,2-b]oxocine-9-carboxylate (4)**

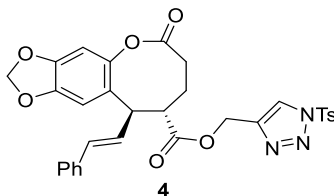

The product was purified by flash column chromatography on silica gel (petroleum ether/ethyl acetate = 5:1) as a white solid at room temperature, M. P. = 36-38°C, 80% yield (49mg).  $[\alpha]_D^{19} = +36$  (c 1.0 (10mg/mL),  $CH_2Cl_2$ , 94 % ee).

**$^1H$  NMR** (400 MHz, Chloroform-d)  $\delta$  8.05 – 7.92 (m, 3H), 7.39 (d,  $J = 7.9$  Hz, 2H), 7.34 – 7.28 (m, 4H), 7.25 (s, 1H), 6.79 (s, 1H), 6.58 (s, 1H), 6.47 – 6.34 (m, 2H), 5.99 (q,  $J = 1.6$  Hz, 2H), 5.15 – 5.05 (m, 2H), 3.85 – 3.74 (m, 1H), 2.90 – 2.79 (m, 1H), 2.53 (ddd,  $J = 12.4, 9.1, 3.1$  Hz, 1H), 2.45 (s, 3H), 2.33 (ddd,  $J = 12.5, 9.5, 3.2$  Hz, 1H), 2.22 (qd,  $J = 9.6, 4.6$  Hz, 1H), 2.16 – 2.06 (m, 1H).

**$^{13}C$  NMR** (101 MHz,  $CDCl_3$ )  $\delta$  172.8, 172.7, 147.5, 146.5, 144.5, 141.9, 136.3, 132.7, 132.6, 130.5, 128.8, 128.7, 127.9, 127.5, 126.3, 126.0, 123.5, 108.1, 102.4, 102.1, 57.3, 49.9, 45.2, 28.4, 26.4, 21.1.

**HPLC:** Chiral Ia-3 column, (n-hexane/i-PrOH = 80:20), flow rate 1 mL/min, I = 250 nm;  $t_{\text{Reten-major}} = 38.44$  min,  $t_{\text{Reten-minor}} = 26.78$  min.

**HRMS (ESI):**  $[M+Na]^+$  calcd for  $[C_{31}H_{27}N_3O_8SNa]$ : 624.1411, found:624.1415.

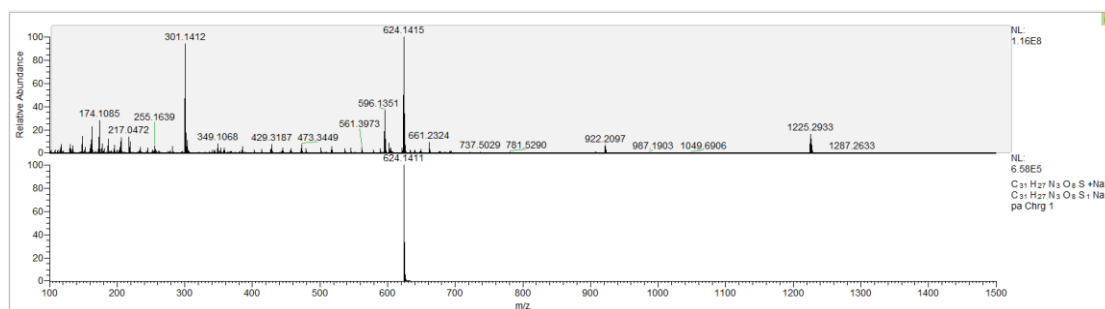

**(E)-5-ethoxy-5-oxopent-3-en-1-yl (9S,10R)-6-oxo-10-((E)-styryl)-7,8,9,10-tetrahydro-6H-[1,3]dioxolo[4',5':4,5]benzo[1,2-b]oxocine-9-carboxylate (5)**

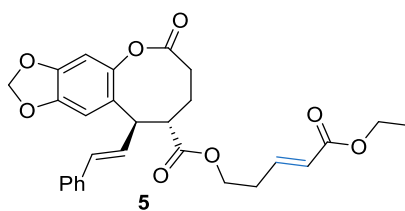

Chemical Formula:  $C_{28}H_{28}O_8$

The product was purified by flash column chromatography on silica gel (petroleum ether/ethyl acetate = 4:1) as a colorless oil at room temperature, 91% yield (48mg).

$[\alpha]_D^{24} = 70$  (c 1.0 (10mg/mL),  $CH_2Cl_2$ , 98 % ee).

$^1H$  NMR (400 MHz, Chloroform- $d$ )  $\delta$  7.34 – 7.27 (m, 5H), 7.25 – 7.20 (m, 1H), 6.87 – 6.79 (m, 1H), 6.60 (s, 1H), 6.47 – 6.36 (m, 2H), 6.00 (q,  $J = 1.4$  Hz, 2H), 5.82 (dt,  $J = 15.7, 1.6$  Hz, 1H), 4.20 (q,  $J = 7.1$  Hz, 2H), 4.10 (tt,  $J = 7.7, 3.9$  Hz, 2H), 3.74 (t,  $J = 8.8$  Hz, 1H), 2.78 (d,  $J = 13.8$  Hz, 1H), 2.54 (ddd,  $J = 12.0, 8.7, 3.2$  Hz, 1H), 2.44 (qd,  $J = 6.7, 1.6$  Hz, 2H), 2.32 (ddd,  $J = 17.9, 10.5, 5.7$  Hz, 1H), 2.26 – 2.08 (m, 2H), 1.30 (t,  $J = 7.1$  Hz, 3H).

$^{13}C$  NMR (101 MHz,  $CDCl_3$ )  $\delta$  172.9, 172.8, 166.0, 147.4, 146.5, 144.4, 143.5, 136.3, 132.6, 128.6, 127.8, 127.5, 126.5, 126.3, 123.7, 107.9, 102.4, 102.1, 62.7, 60.4, 50.8, 43.9, 31.2, 28.9, 27.1, 14.2.

**HPLC:** Chiral Ia-3 column, (*n*-hexane/*i*-PrOH = 80:20), flow rate 1 mL/min,  $I = 250$  nm;  $t_{Reten-major} = 33.33$  min,  $t_{Reten-minor} = 20.12$  min.

HRMS (ESI):  $[M+Na]^+$  calcd for  $[C_{28}H_{28}O_8Na]$ : 515.1676, found: 515.1678.

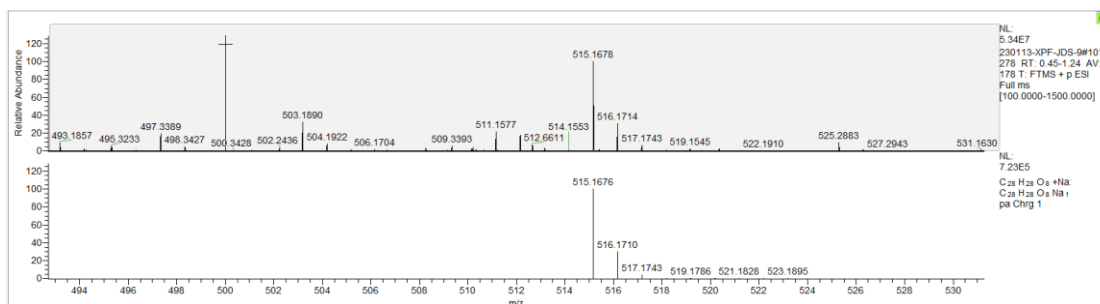

## 9 NMR spectra of 8-memebered lactone

### Compound-3aa ( $^1\text{H}$ NMR 400MHz, $\text{CDCl}_3$ )

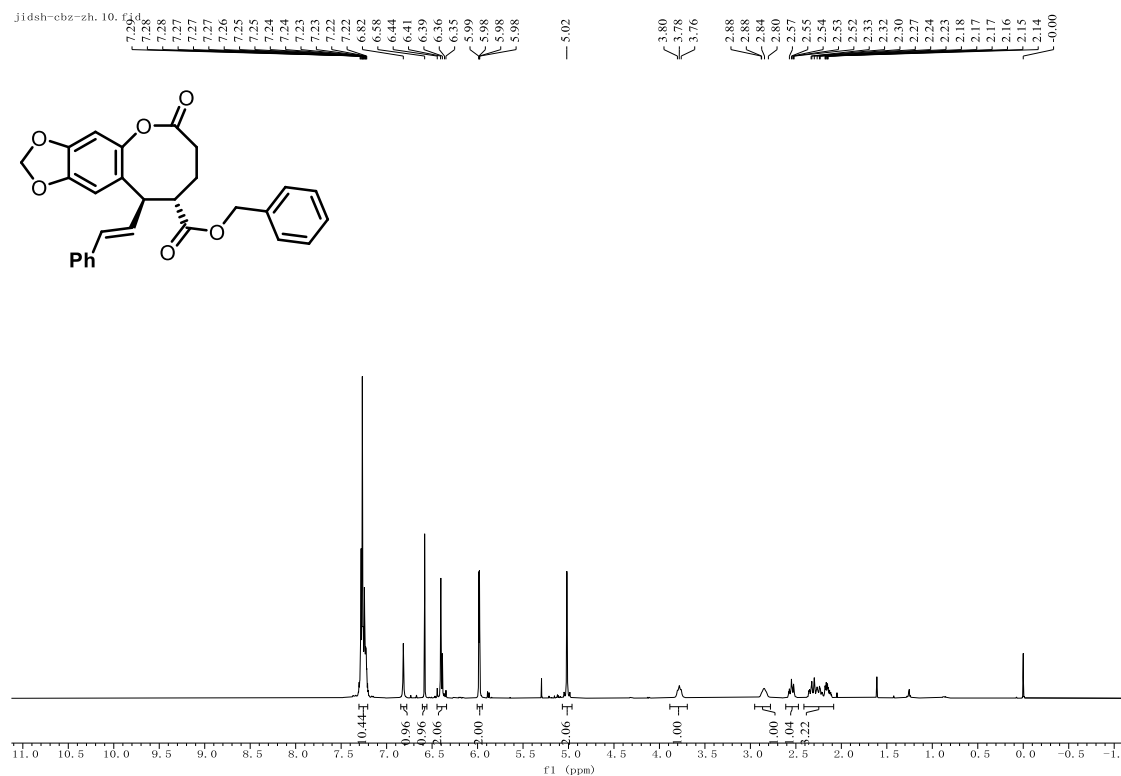

### Compound-3aa ( $^{13}\text{C}$ NMR 101MHz, $\text{CDCl}_3$ )

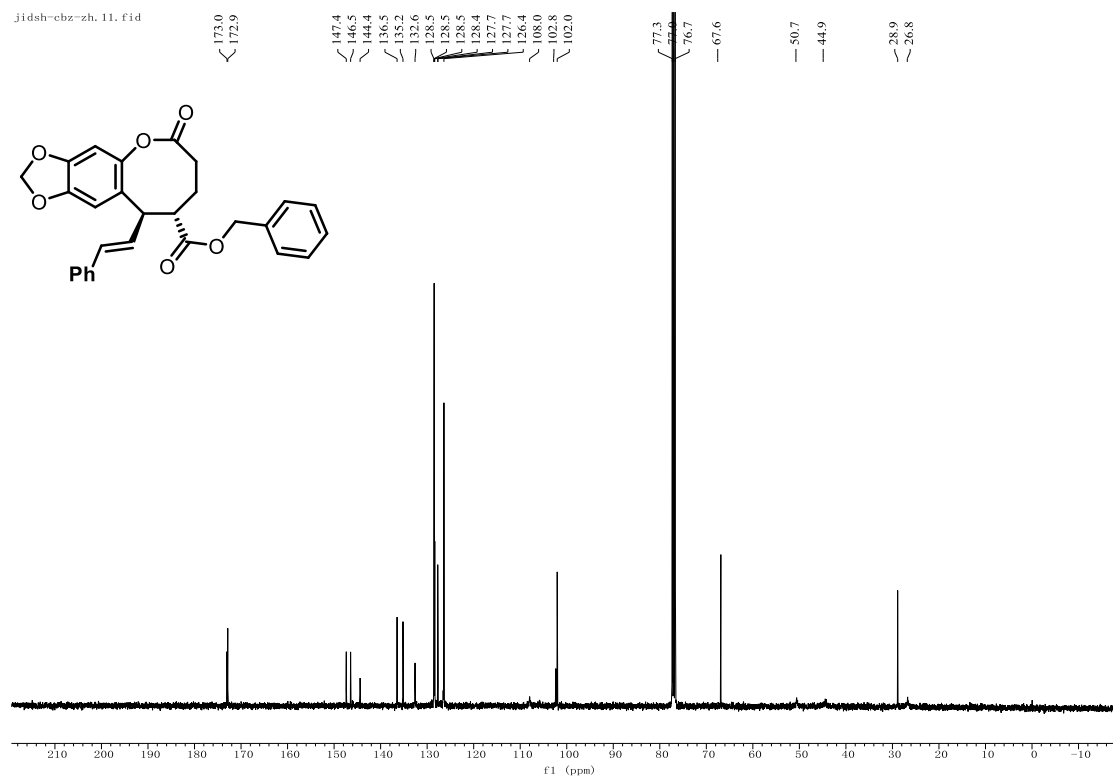



Compound-3aa (HSQC-400MHz, CDCl<sub>3</sub>)

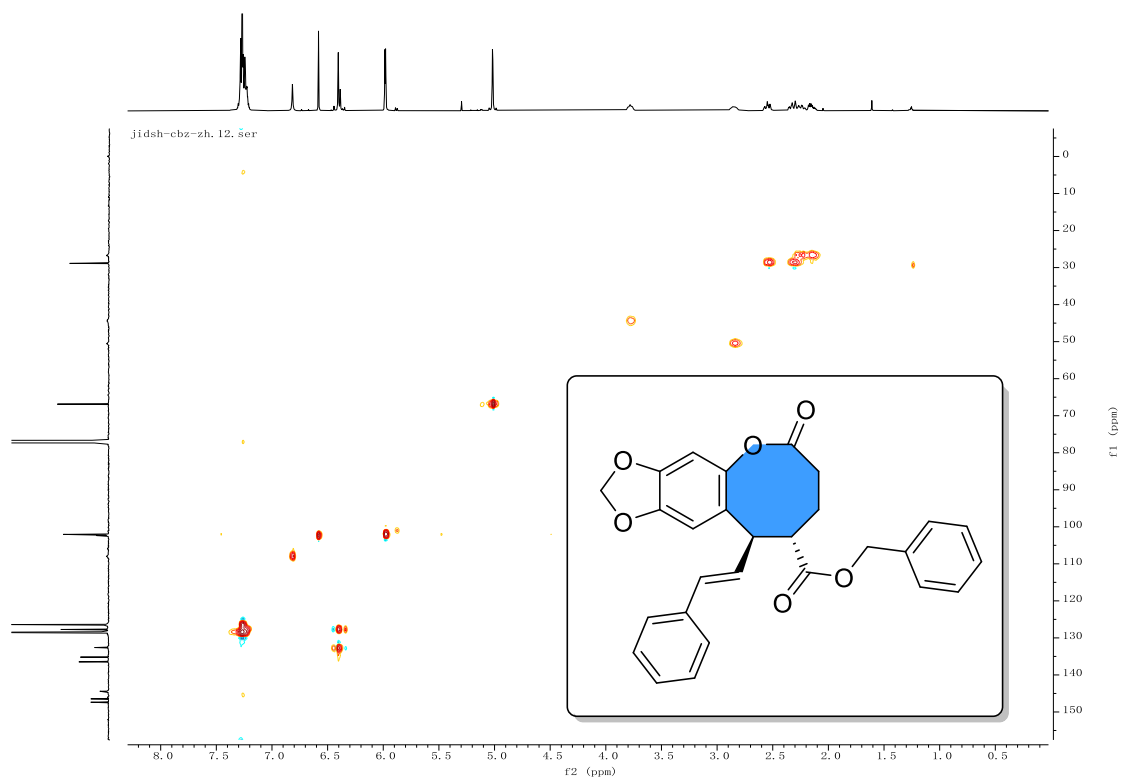

Compound-3ba ( $^1\text{H}$ NMR 400MHz,  $\text{CDCl}_3$ )

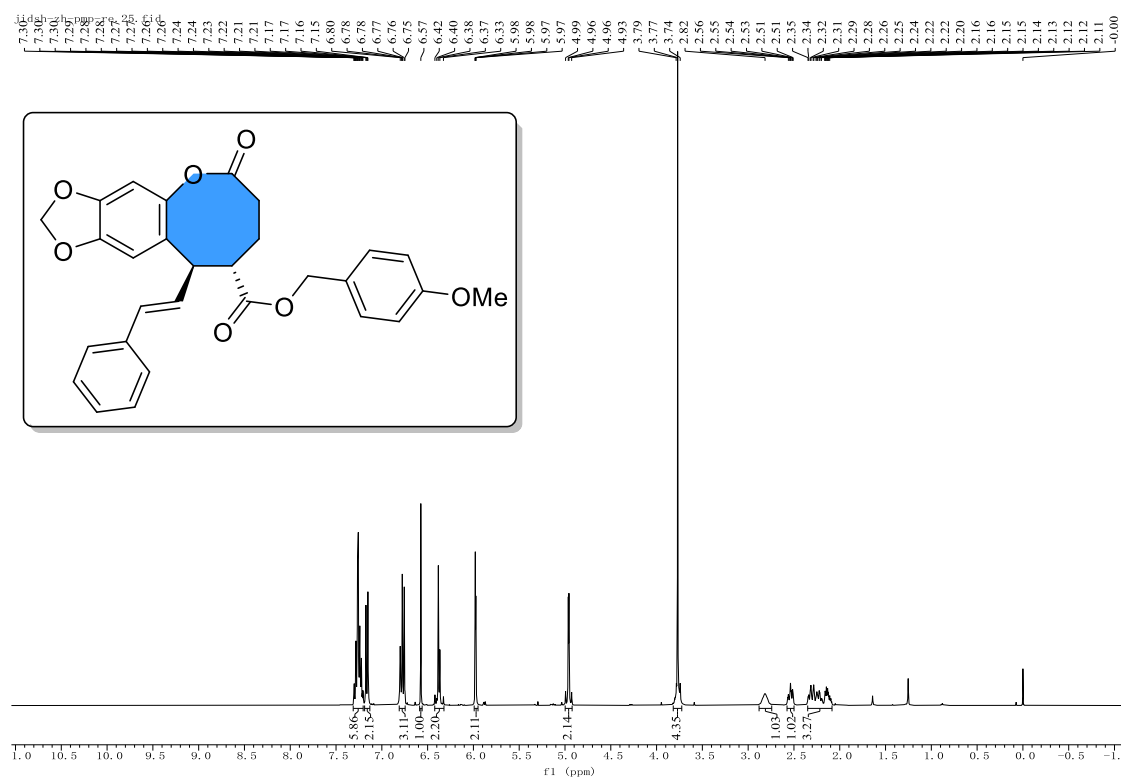

Compound-3ba ( $^{13}\text{C}$ NMR 101MHz,  $\text{CDCl}_3$ )

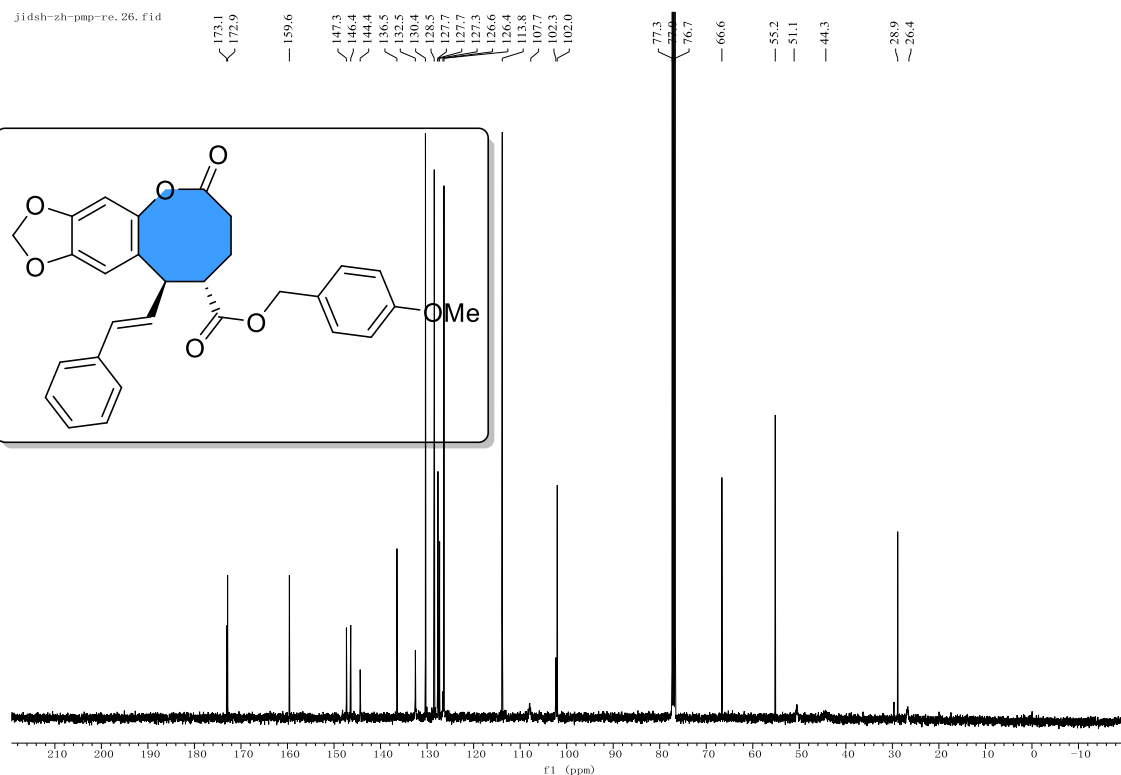

Compound-3ba HSQC, 400MHz, CDCl<sub>3</sub>

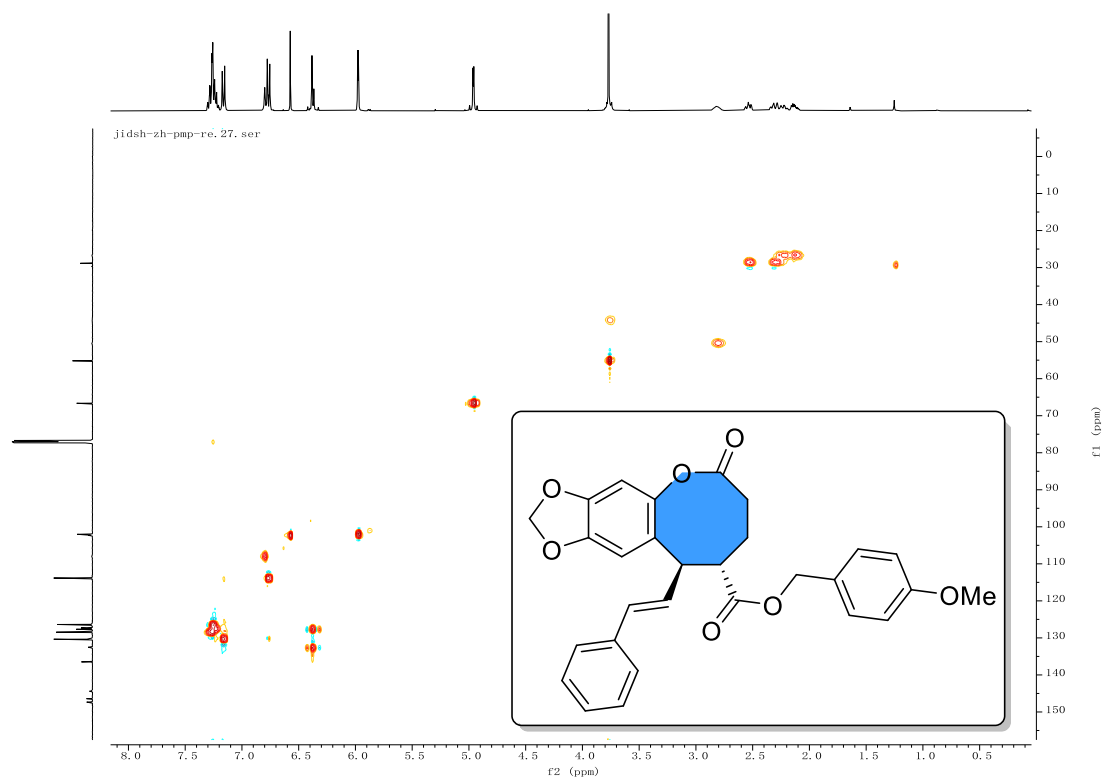

Compound-3ca <sup>1</sup>H NMR 400MHz, CDCl<sub>3</sub>

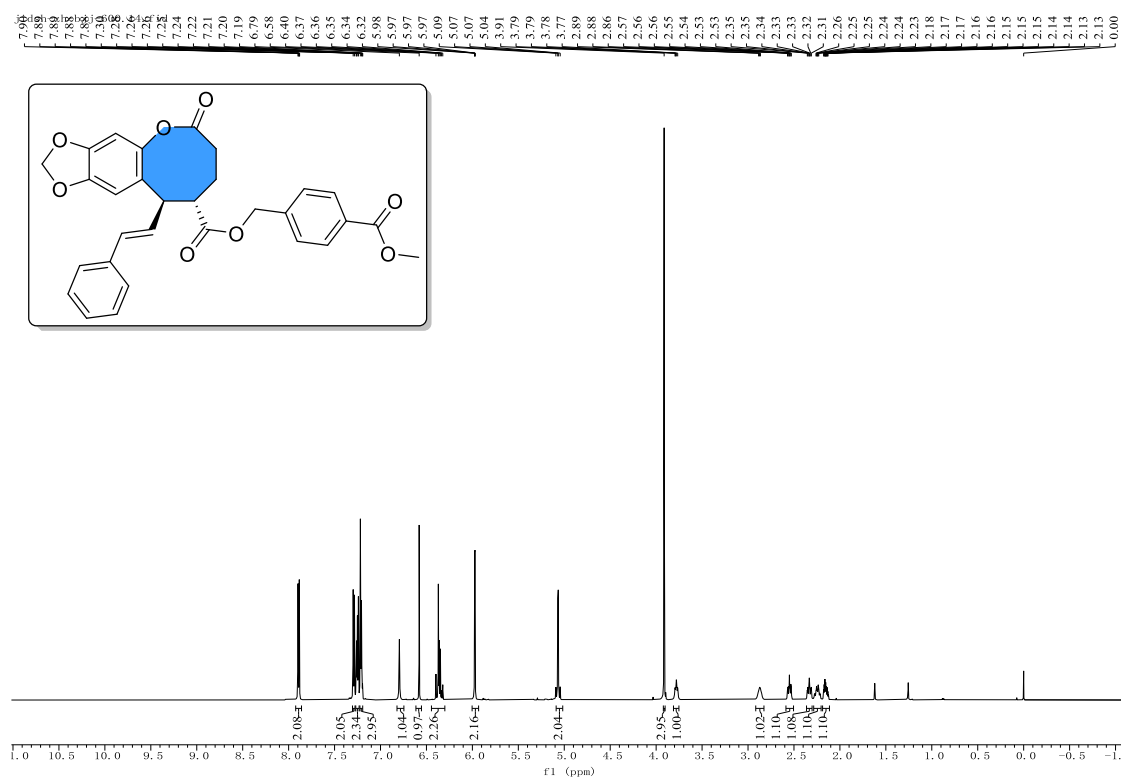

Compound-3ca <sup>13</sup>C NMR 101MHz, CDCl<sub>3</sub>

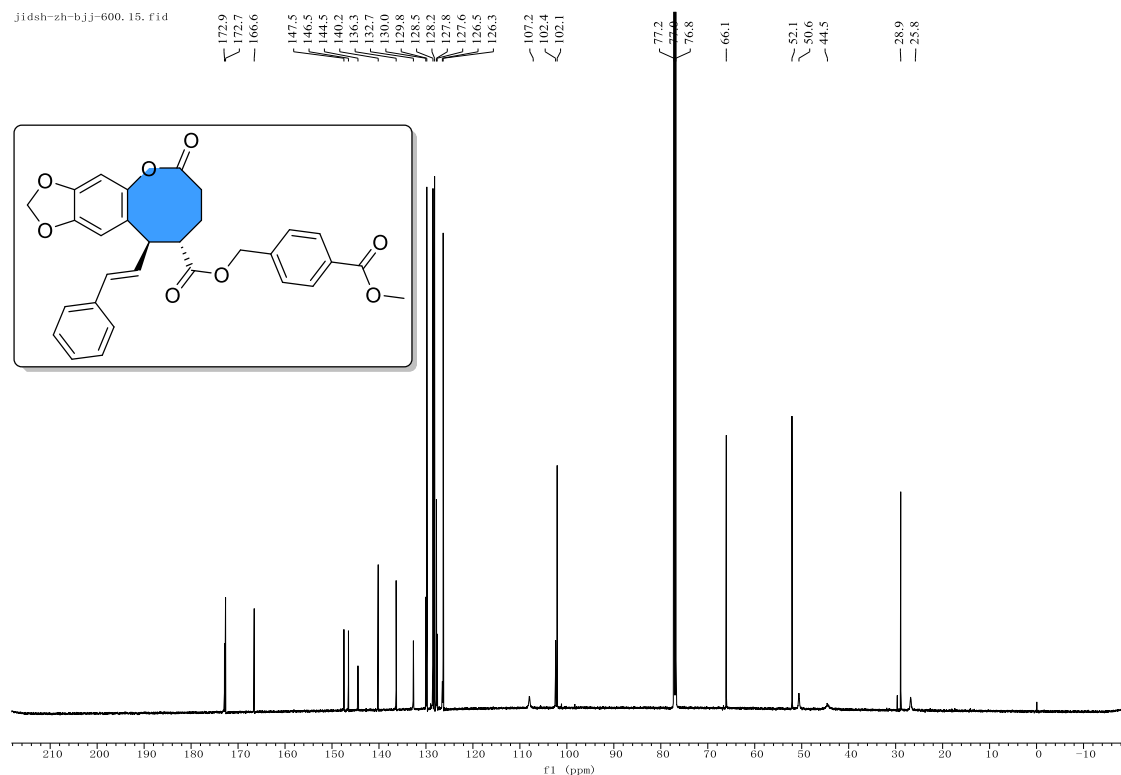

# HSQC

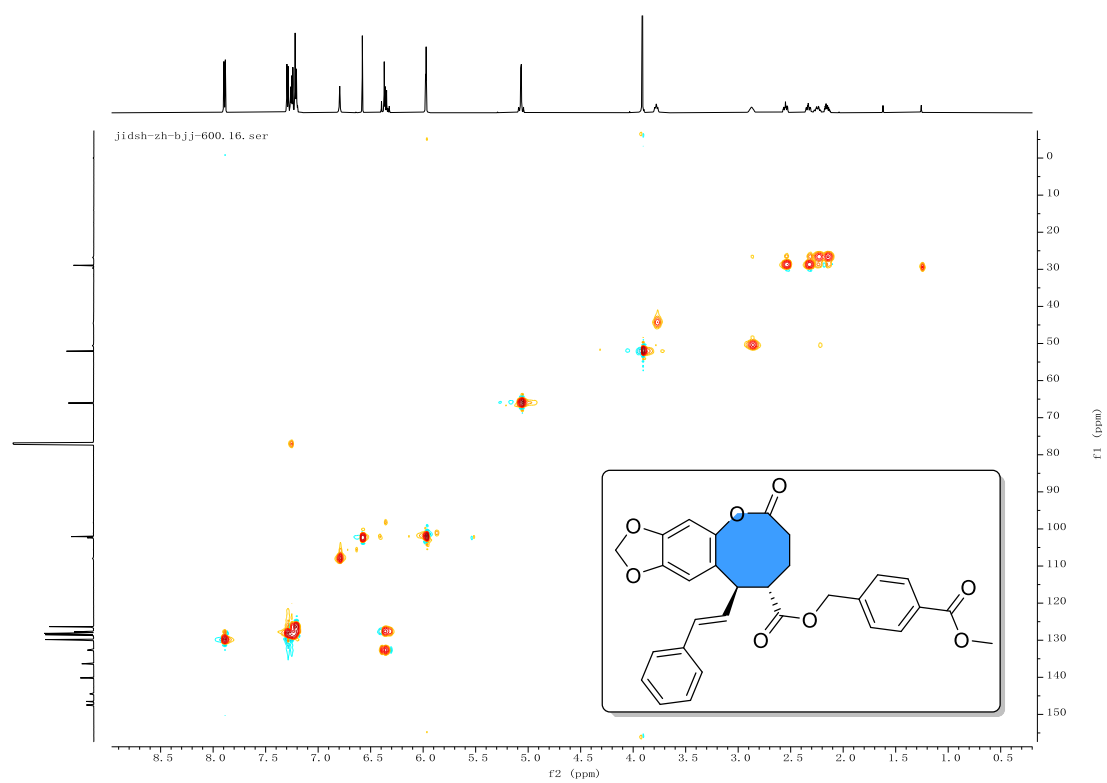

### Compound-3da (<sup>1</sup>HNMR 400MHz, CDCl<sub>3</sub>)

jidsh-zh-byc-re.10.fid

7.31, 7.29, 7.27, 7.25, 7.23, 7.11, 7.11, 7.12, 6.75, 6.58, 6.37, 6.34, 6.33, 6.29, 6.29, 5.99, 5.98, 4.20, 4.18, 4.17, 3.73, 3.72, 3.70, 2.88, 2.86, 2.84, 2.81, 2.78, 2.77, 2.55, 2.54, 2.52, 2.51, 2.49, 2.49, 2.49, 2.35, 2.32, 2.31, 2.27, 2.27, 2.24, 2.21, 2.20, 2.18, 2.11, 2.09, 2.08, 2.07, 2.06, 2.04, -0.00

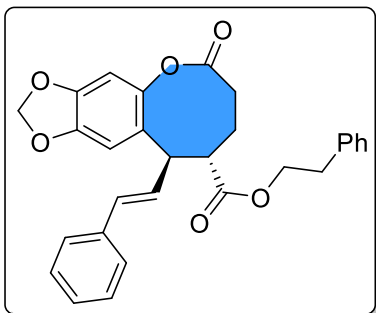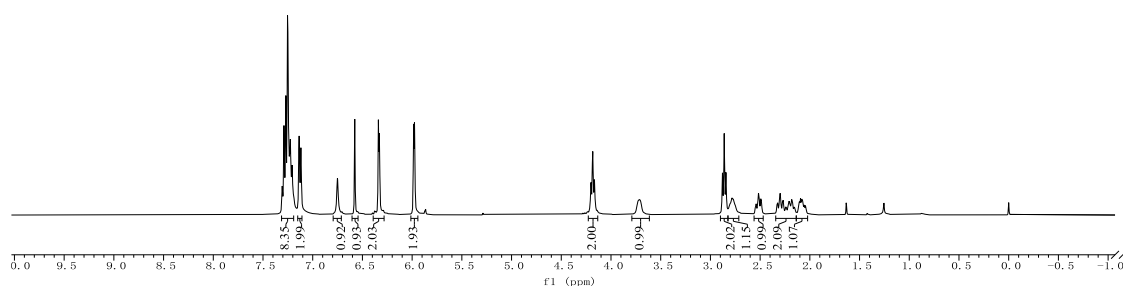

### Compound-3da <sup>13</sup>CNMR 101MHz, CDCl<sub>3</sub>

jidsh-zh-byc-re.11.fid

173.0, 172.8, 147.4, 146.4, 144.4, 137.5, 136.5, 132.5, 128.9, 128.5, 128.5, 127.7, 127.6, 126.6, 126.3, 107.9, 102.3, 102.0, 77.3, 77.0, 76.7, 65.4, 50.4, 44.6, 34.9, 28.9, 26.4

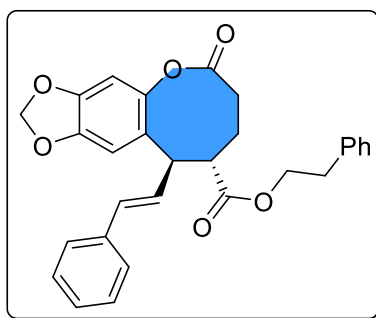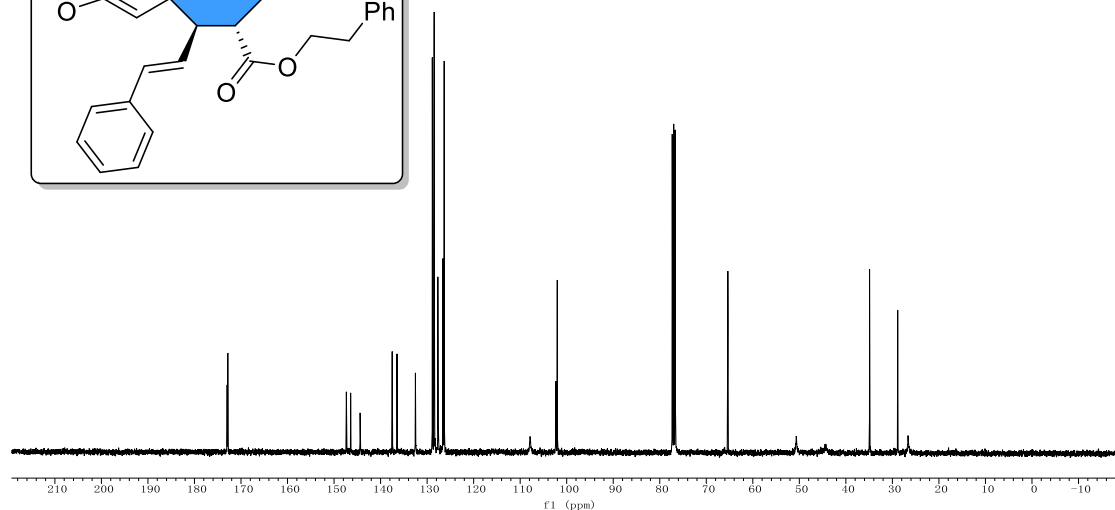

# Hsqc

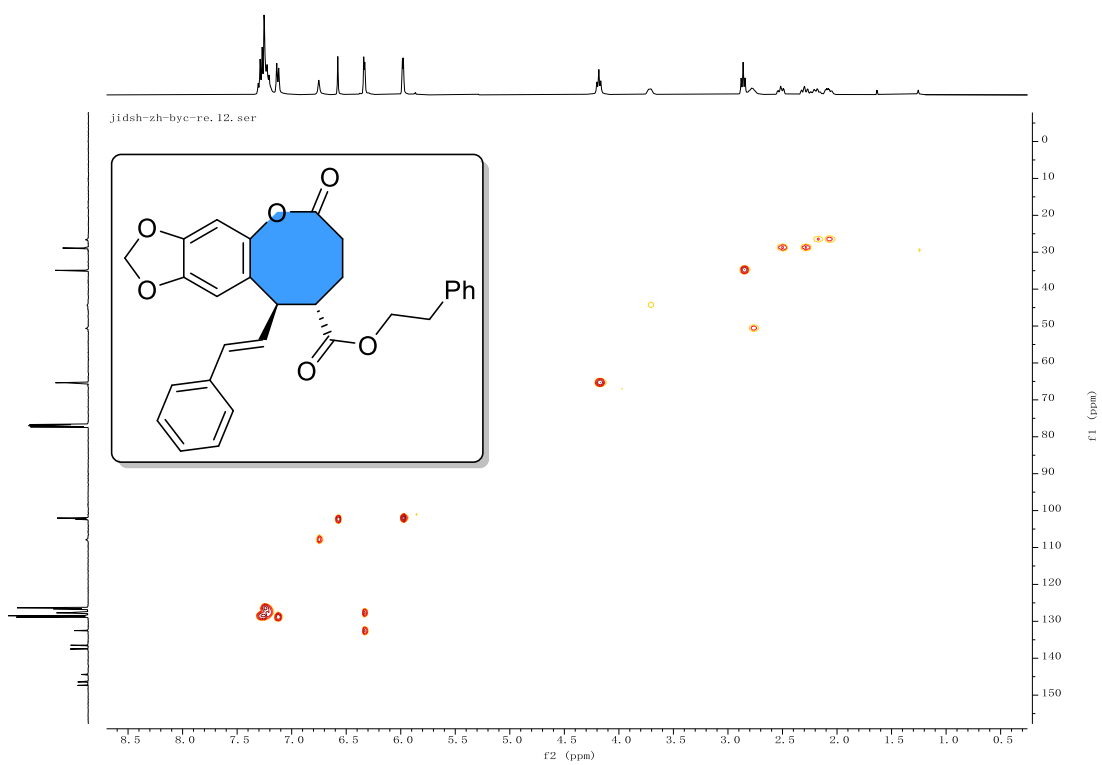

Compound-3ea (<sup>1</sup>HNMR 400MHz, CDCl<sub>3</sub>)

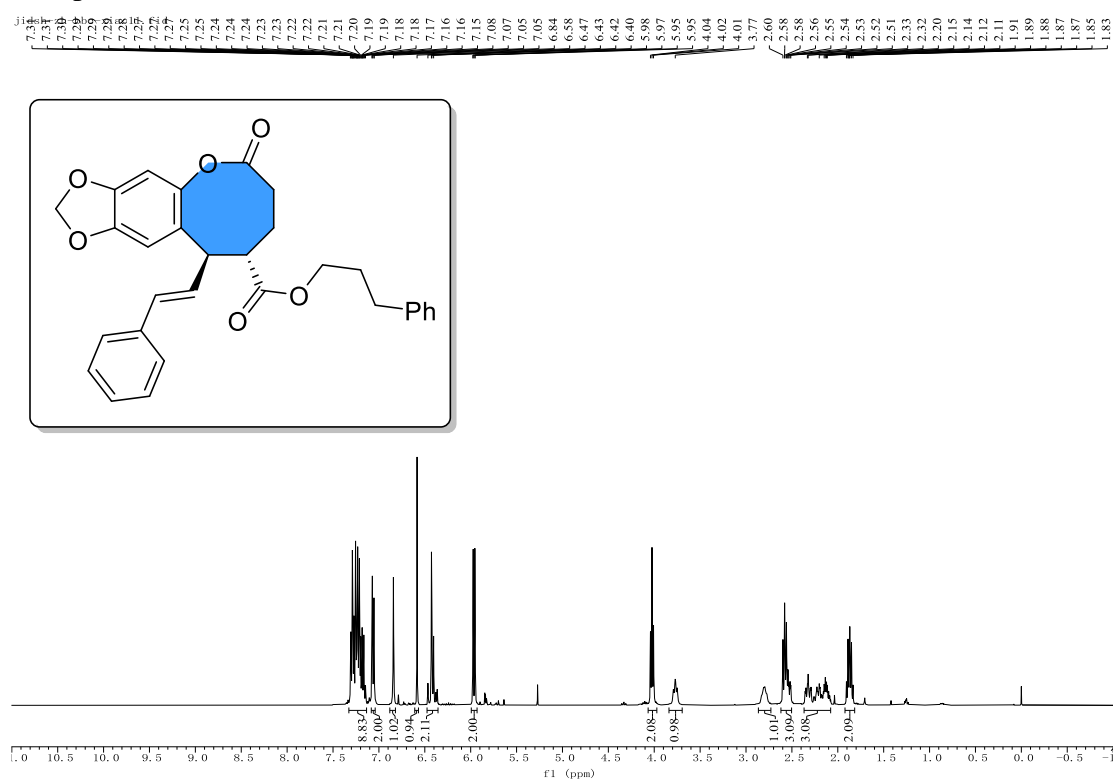

<sup>13</sup>CNMR 101MHz, CDCl<sub>3</sub>

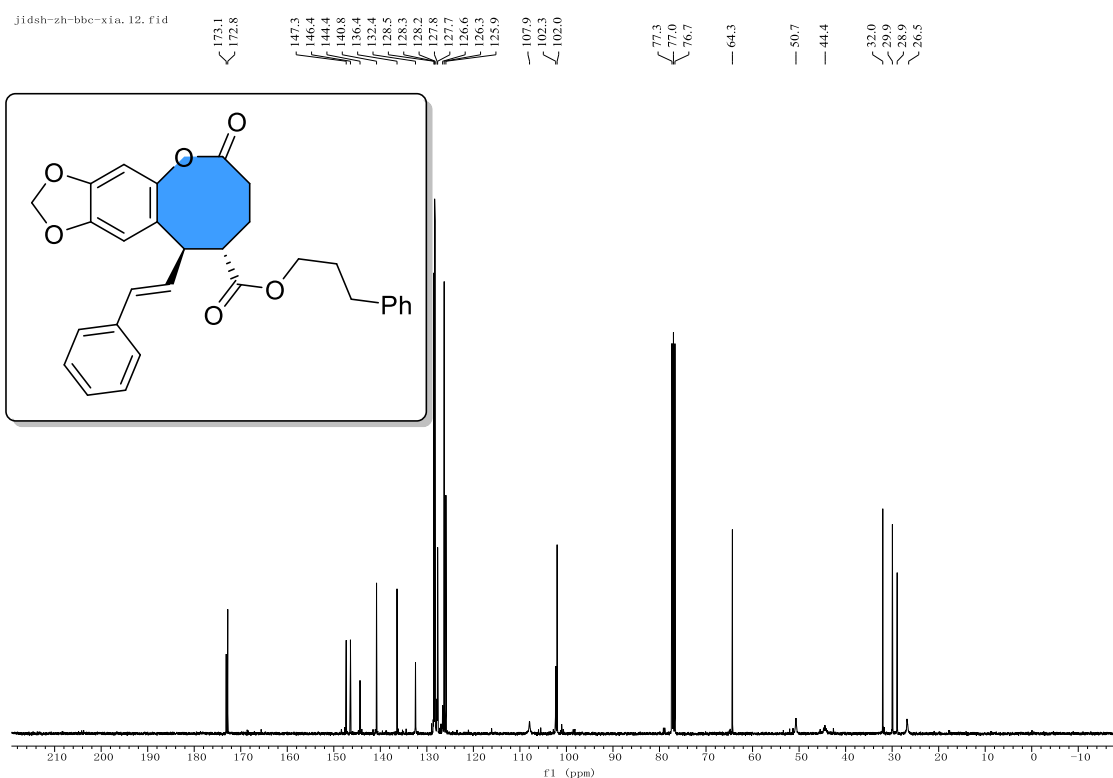



Compound-3fa (<sup>1</sup>HNMR 400MHz, CDCl<sub>3</sub>)

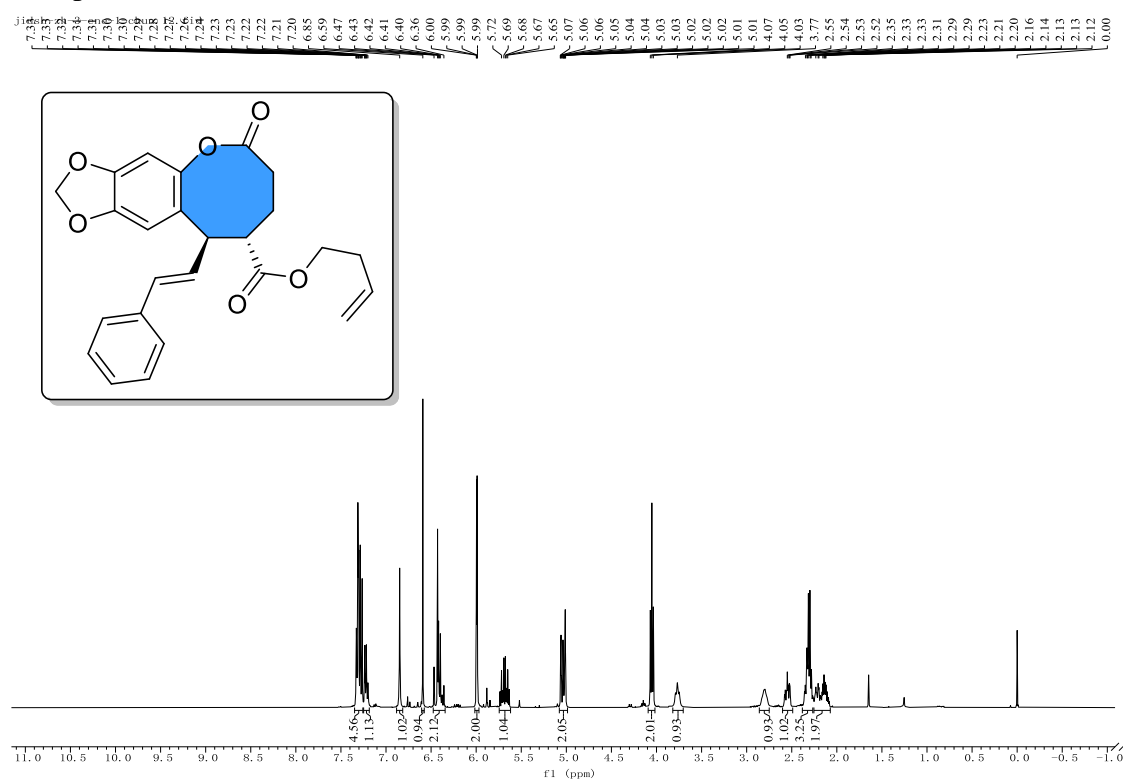

<sup>13</sup>CNMR 101MHz, CDCl<sub>3</sub>

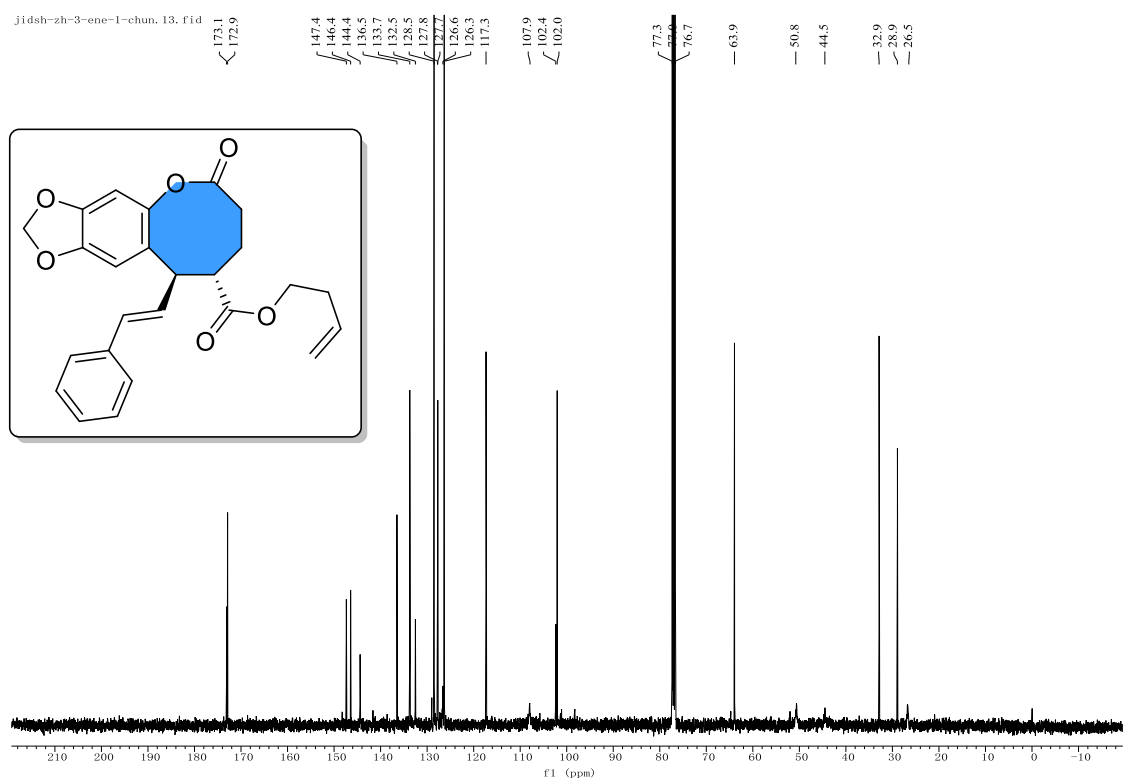

# HSQC

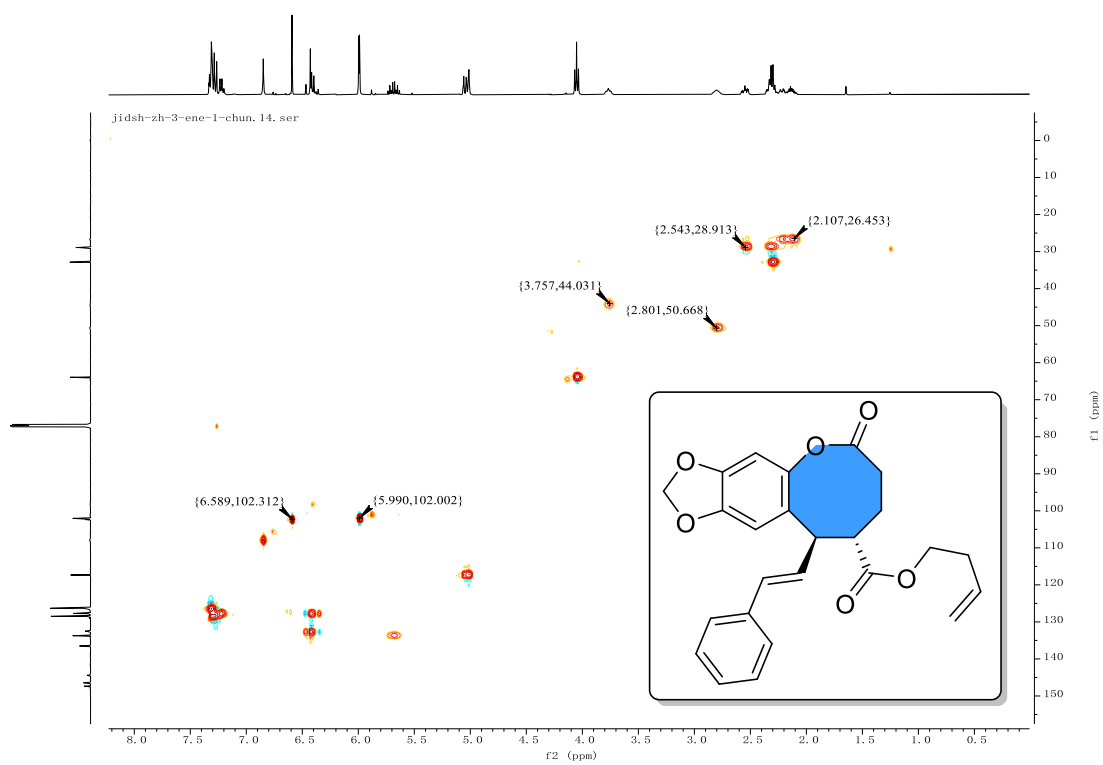

Compound-3ga ( $^1\text{H}$ NMR 400MHz,  $\text{CDCl}_3$ )

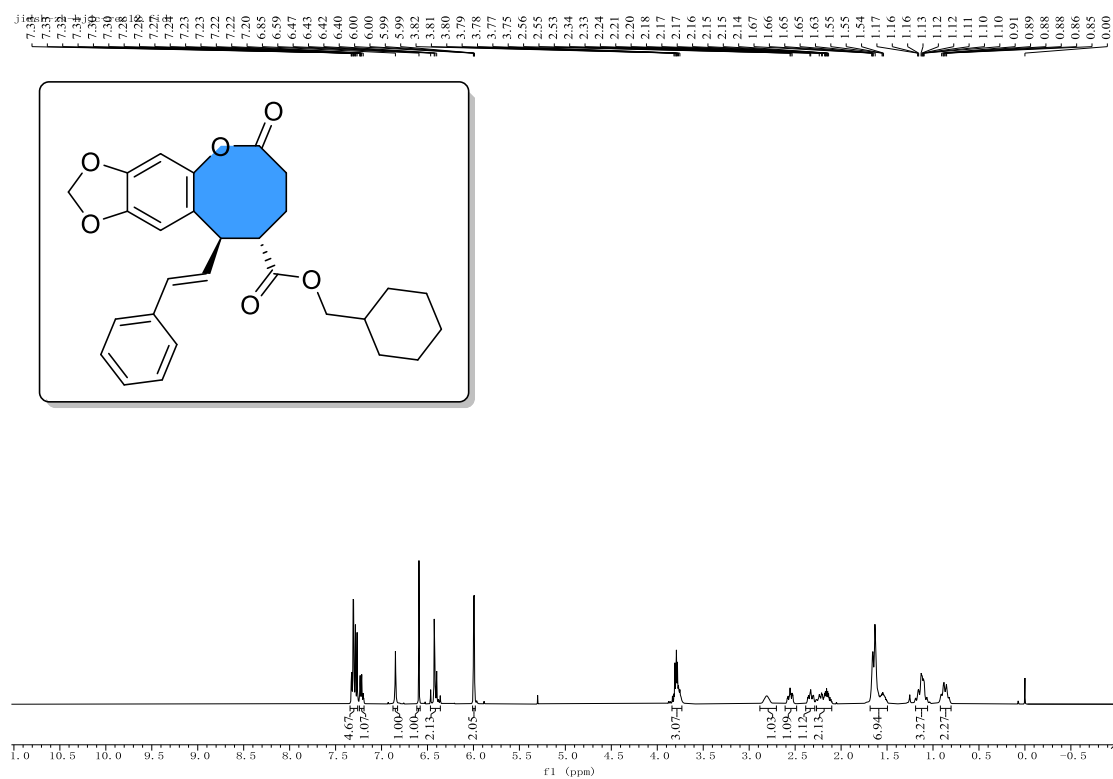

Compound-3ga ( $^{13}\text{C}$ NMR 101MHz,  $\text{CDCl}_3$ )

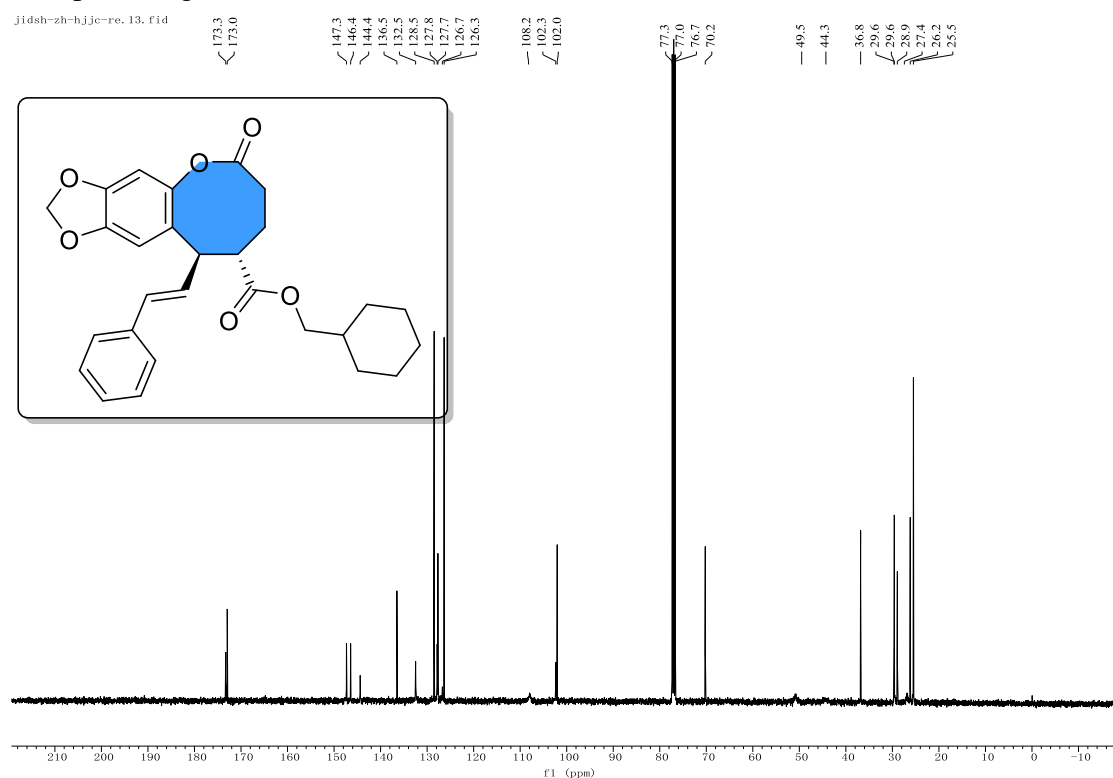

# HSQC

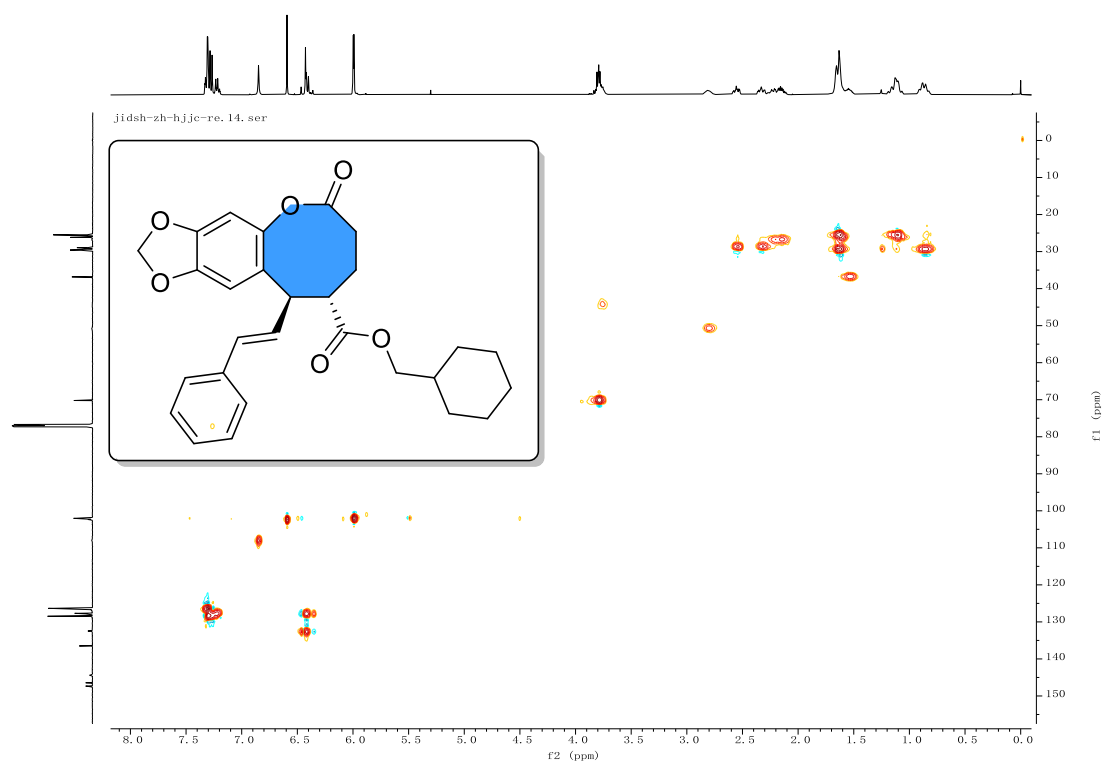

### Compound-3ha (<sup>1</sup>HNMR 400MHz, CDCl<sub>3</sub>)

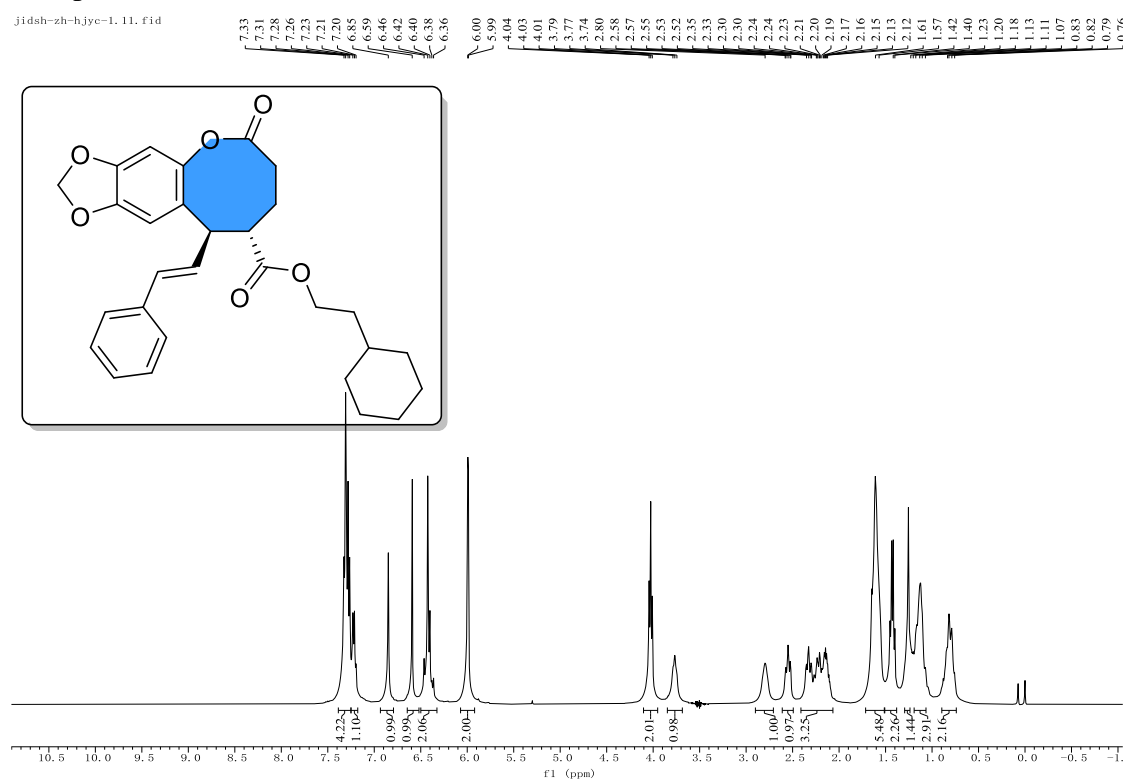

### Compound-3ha (<sup>13</sup>CNMR 101MHz, CDCl<sub>3</sub>)

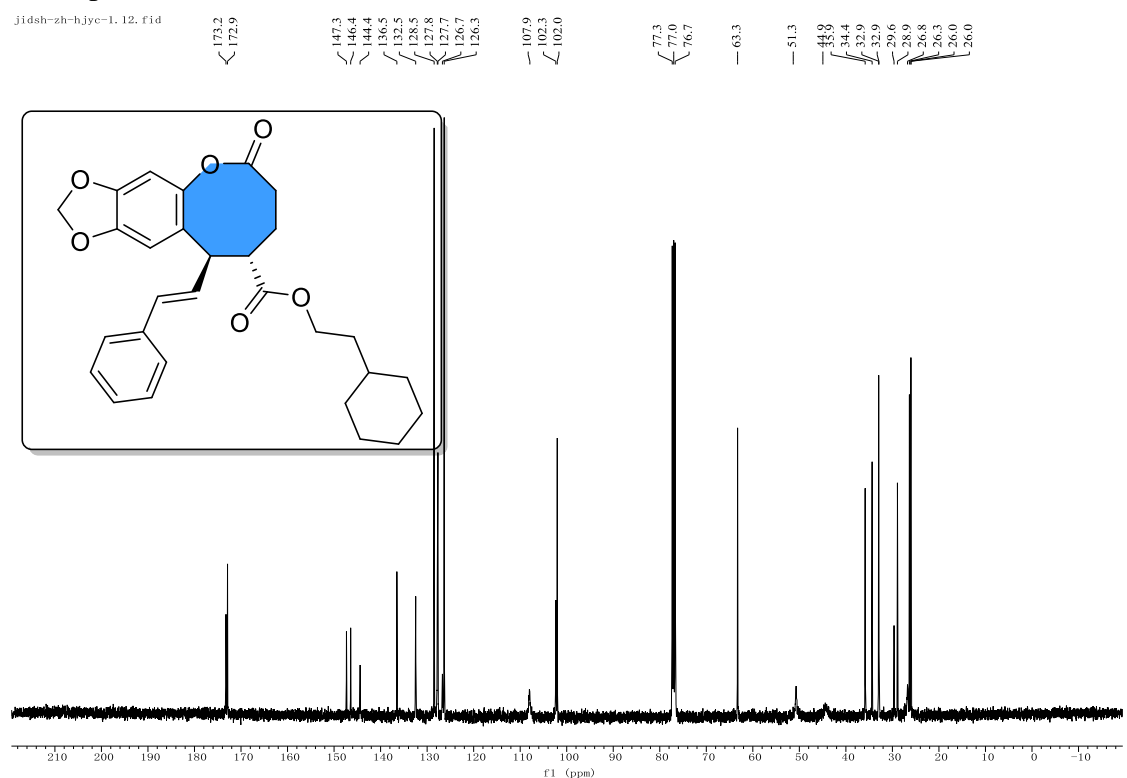

# HSQC

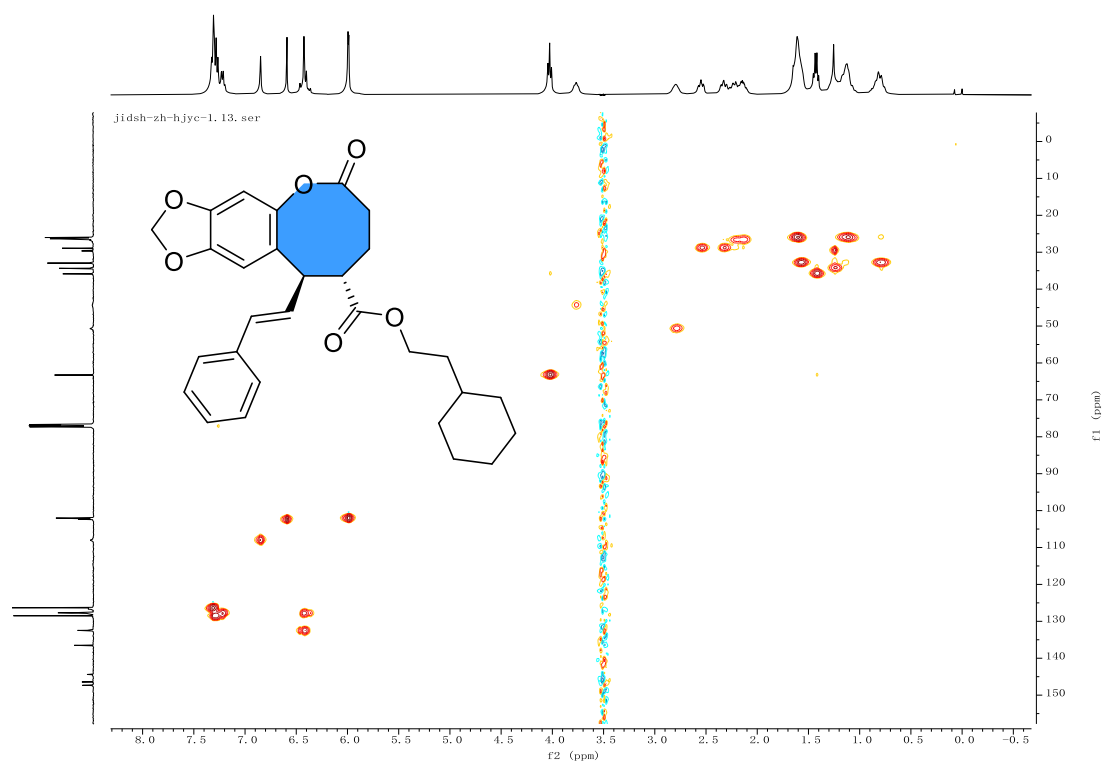

Compound-3ia (<sup>1</sup>HNMR 400MHz, CDCl<sub>3</sub>)

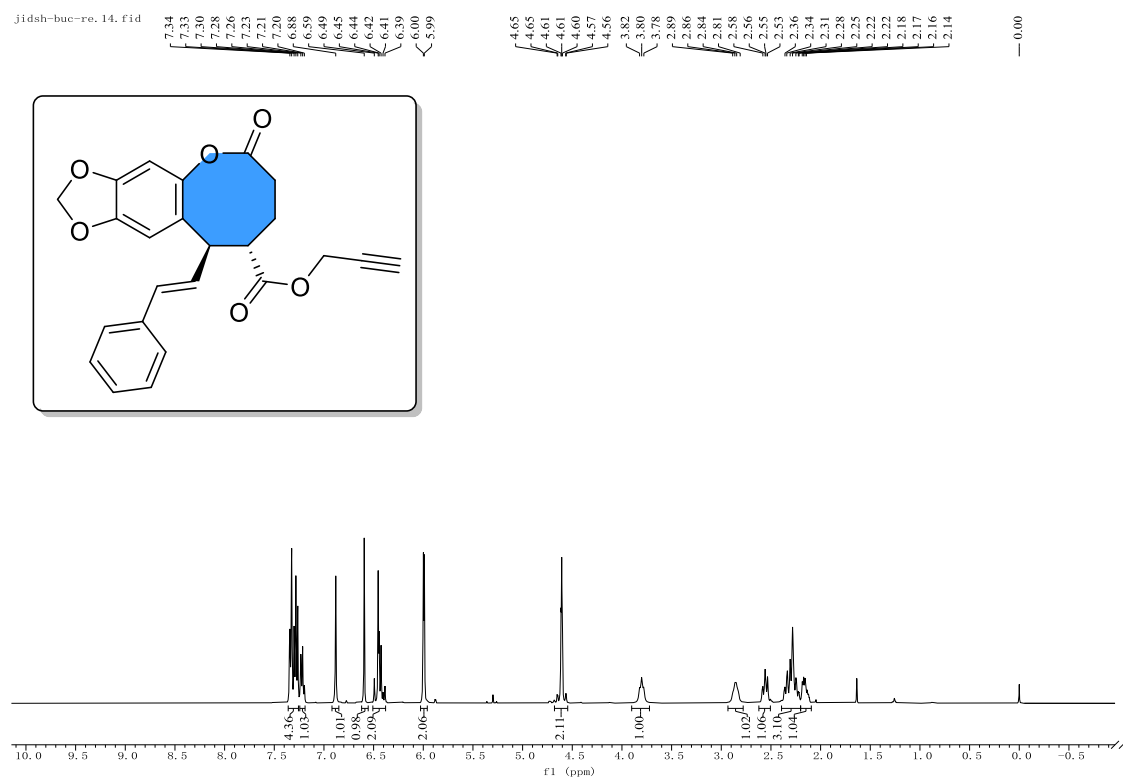

Compound-3ia (<sup>13</sup>CNMR 101MHz, CDCl<sub>3</sub>)

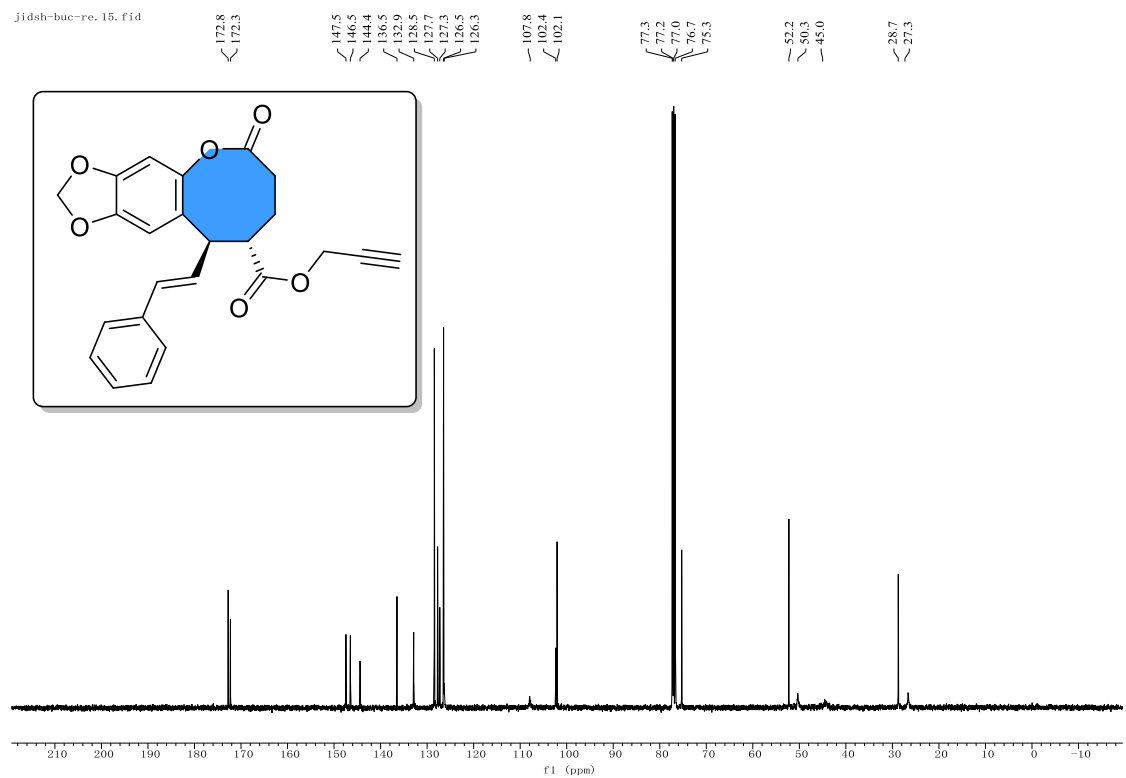

# HSQC

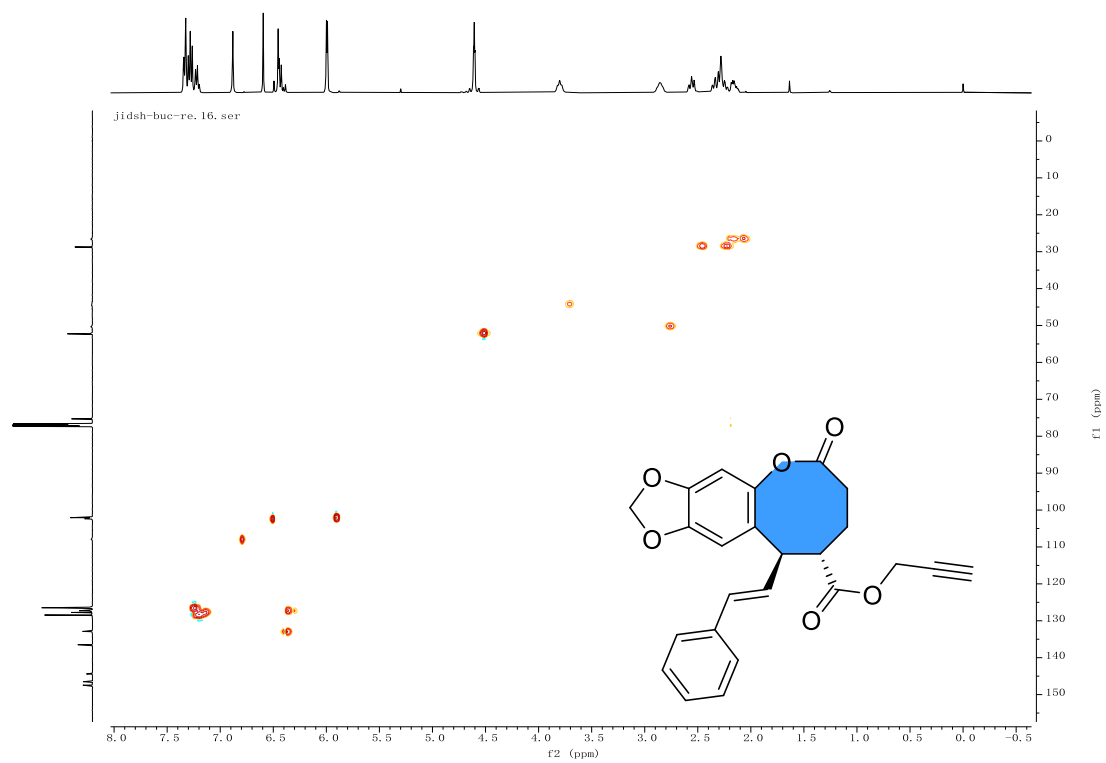



Compound-3ja (<sup>1</sup>H NMR 400MHz, CDCl<sub>3</sub>)

7.344, 7.335, 7.331, 7.328, 7.316, 7.293, 7.285, 7.265, 7.255, 7.24, 7.24, 7.23, 7.22, 7.22, 6.86, 6.61, 6.49, 6.45, 6.43, 6.41, 6.39, 6.37, 6.01, 6.01, 6.00, 6.00, 4.40, 4.39, 4.38, 4.37, 4.35, 4.34, 4.33, 4.32, 4.31, 3.81, 3.79, 3.77, 2.92, 2.91, 2.60, 2.59, 2.58, 2.57, 2.56, 2.54, 2.54, 2.38, 2.38, 2.36, 2.35, 2.34, 2.33, 2.32, 2.31, 2.26, 2.24, 2.22, 2.22, 2.21, 2.21, 2.20, 2.19, 2.18, 2.18, 2.16, 2.16, -0.00

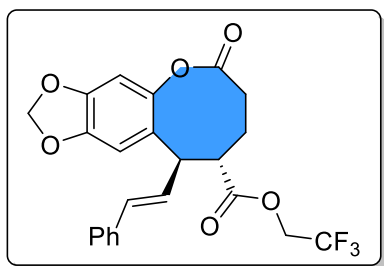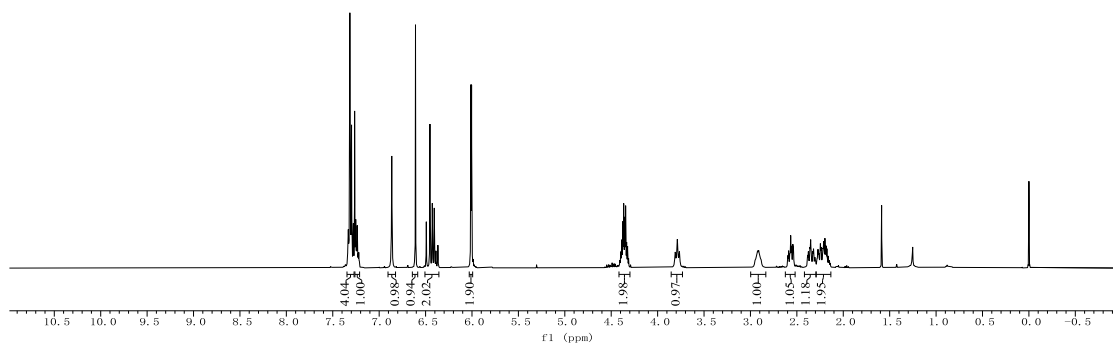

Compound-3ja (<sup>13</sup>C NMR 101MHz, CDCl<sub>3</sub>)

jids-cf3oh-230629.12.fid

172.5, 171.6, 147.6, 146.6, 144.5, 136.2, 133.1, 128.6, 127.9, 126.9, 126.4, 126.1, 124.1, 121.4, 107.7, 102.5, 102.1, 77.3, 77.0, 76.7, 61.3, 60.9, 60.5, 60.2, 50.3, 44.6, 28.8, 26.7

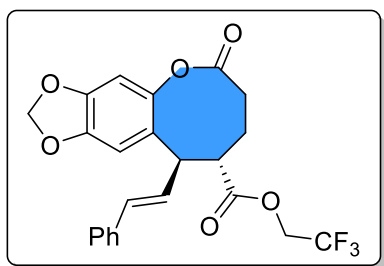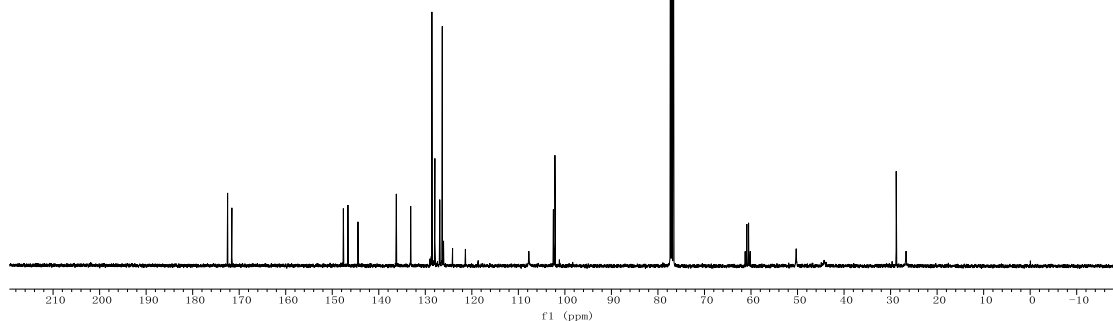

3ja-HSQC (400MHz, CDCl<sub>3</sub>)

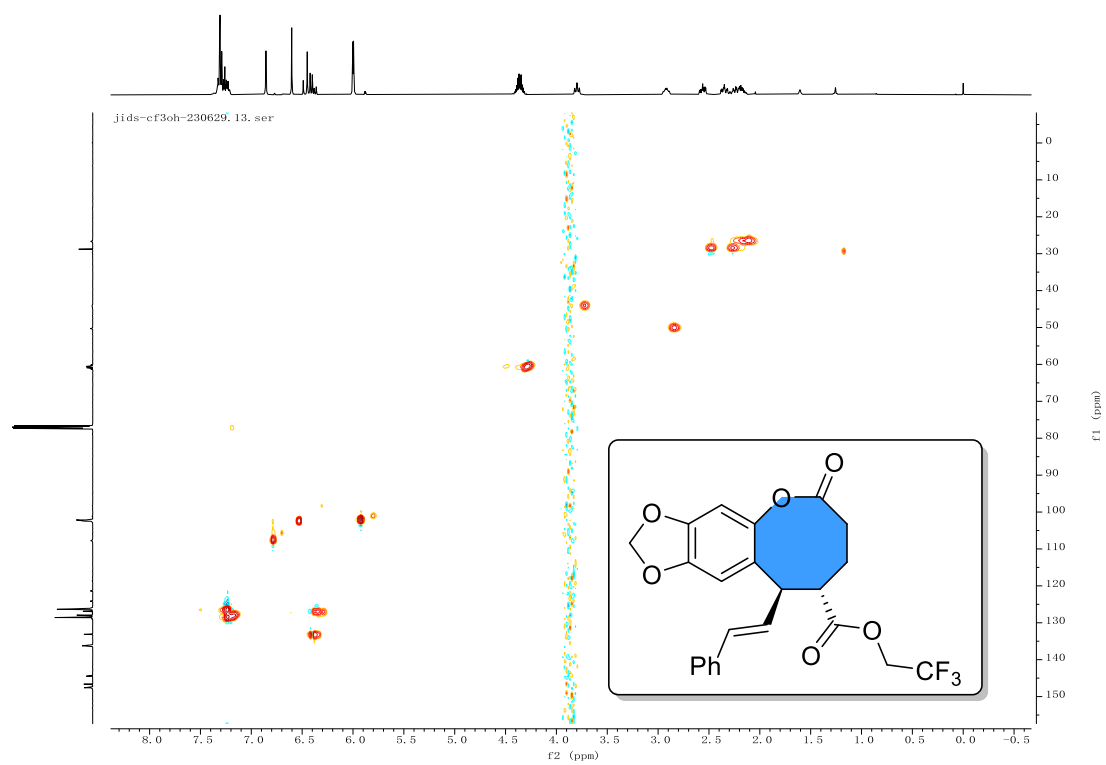

# Compound-3ka (<sup>1</sup>HNMR 400MHz, CDCl<sub>3</sub>)

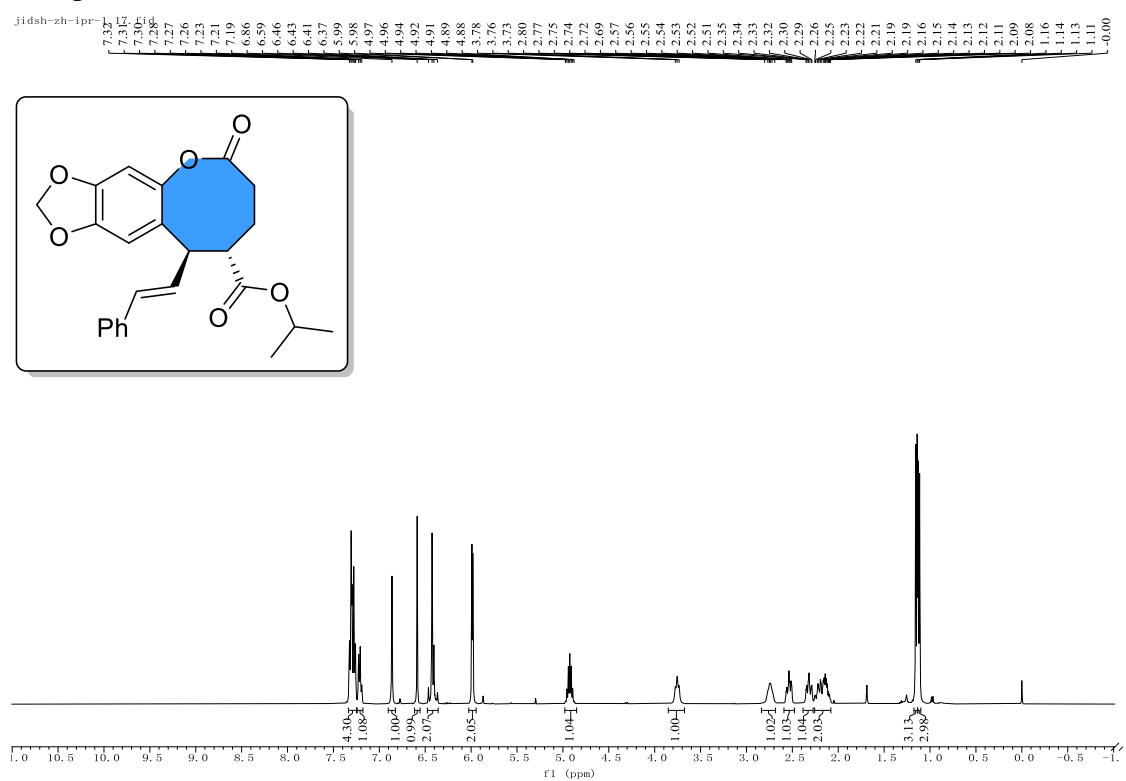

# <sup>13</sup>CNMR 101MHz, CDCl<sub>3</sub>

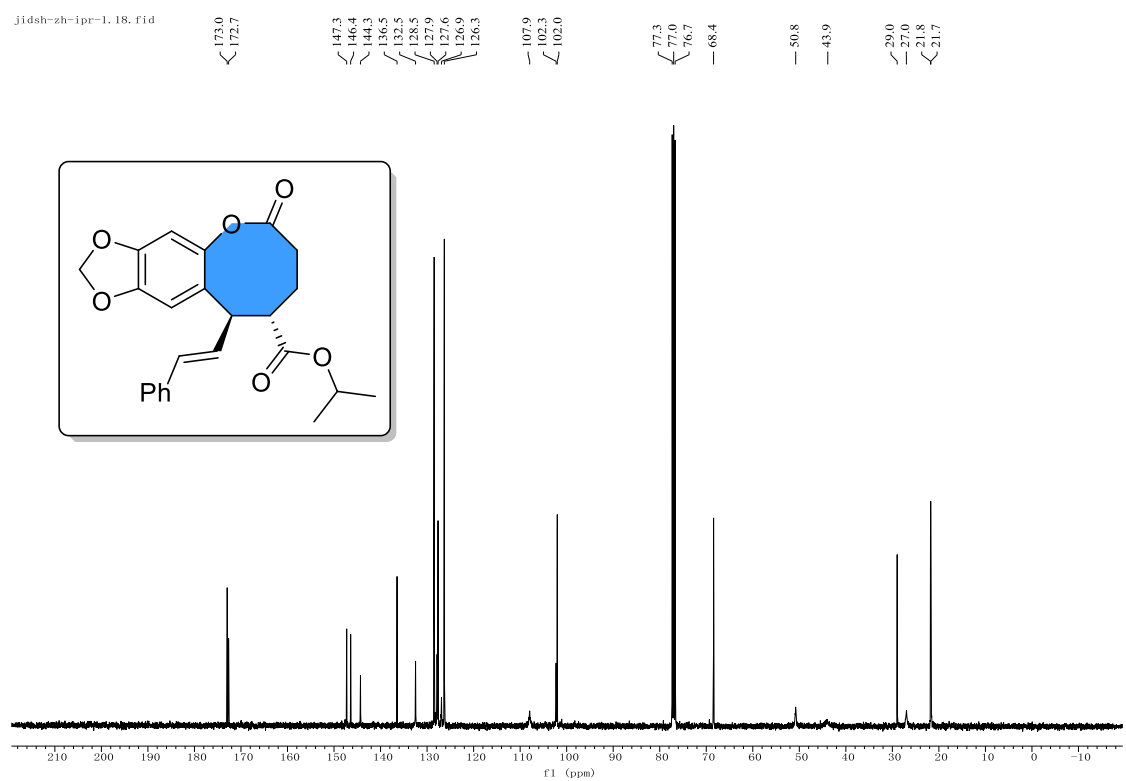

# HSQC

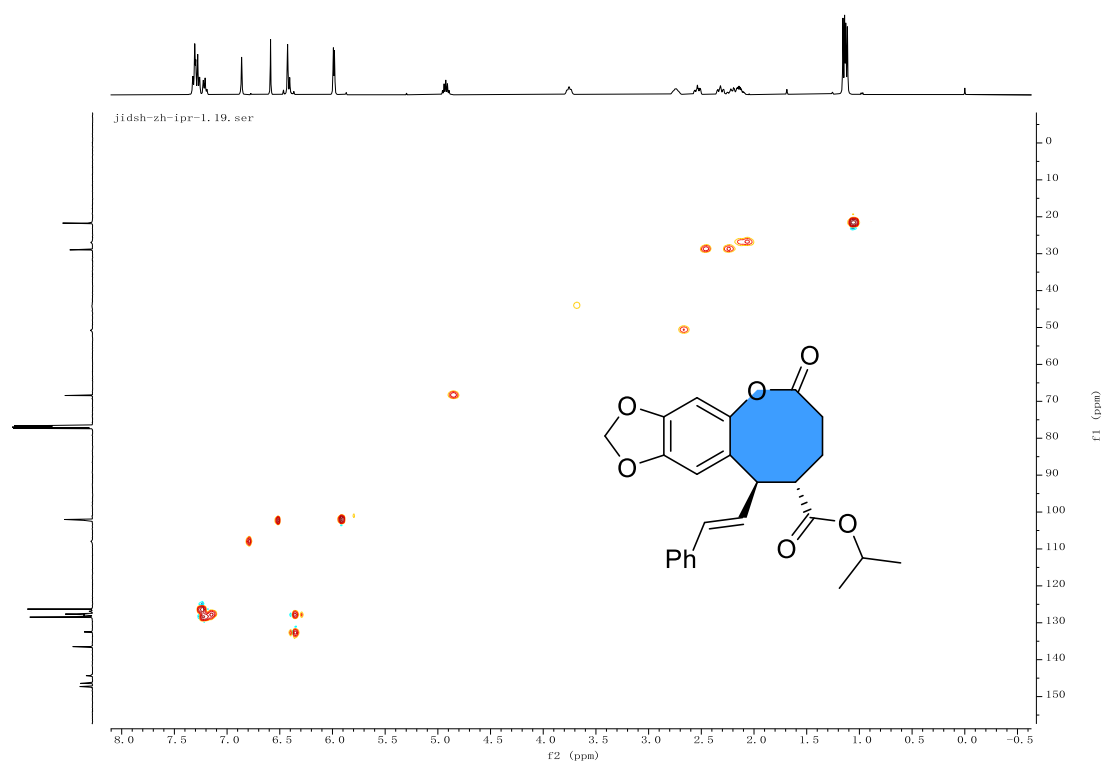

Compound-3la (<sup>1</sup>HNMR 400MHz, CDCl<sub>3</sub>)

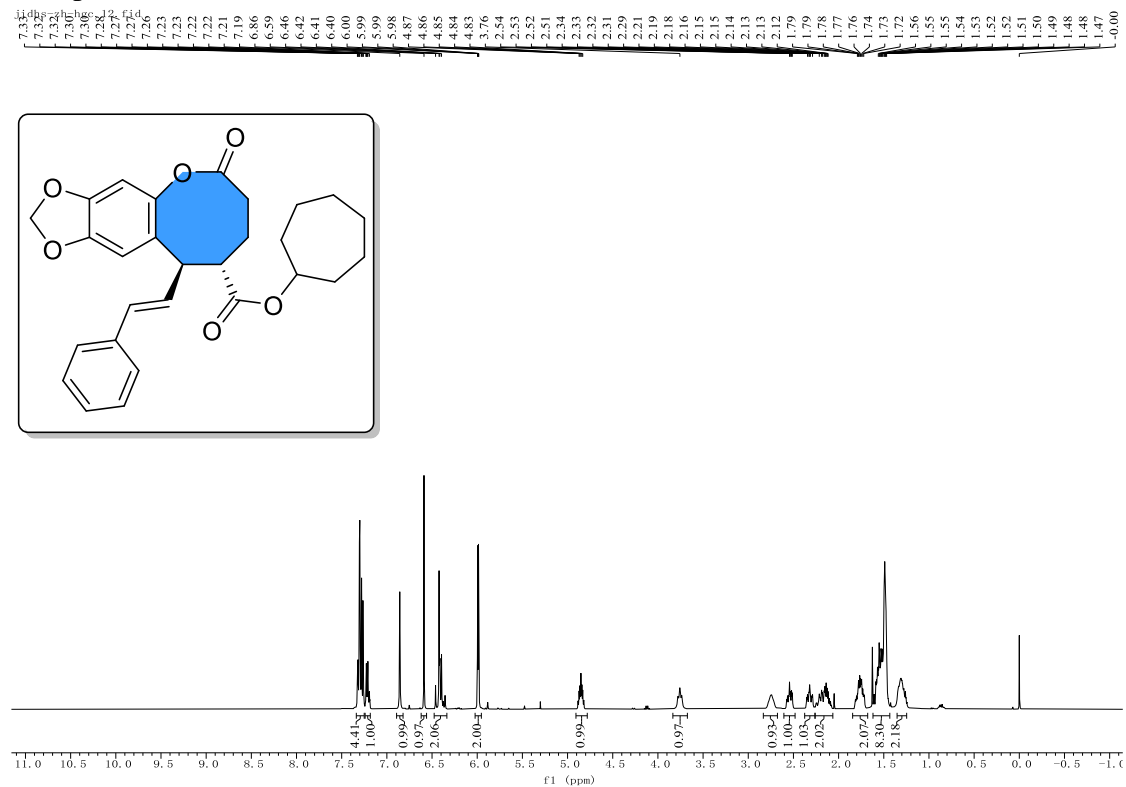

<sup>13</sup>CNMR 101MHz, CDCl<sub>3</sub>

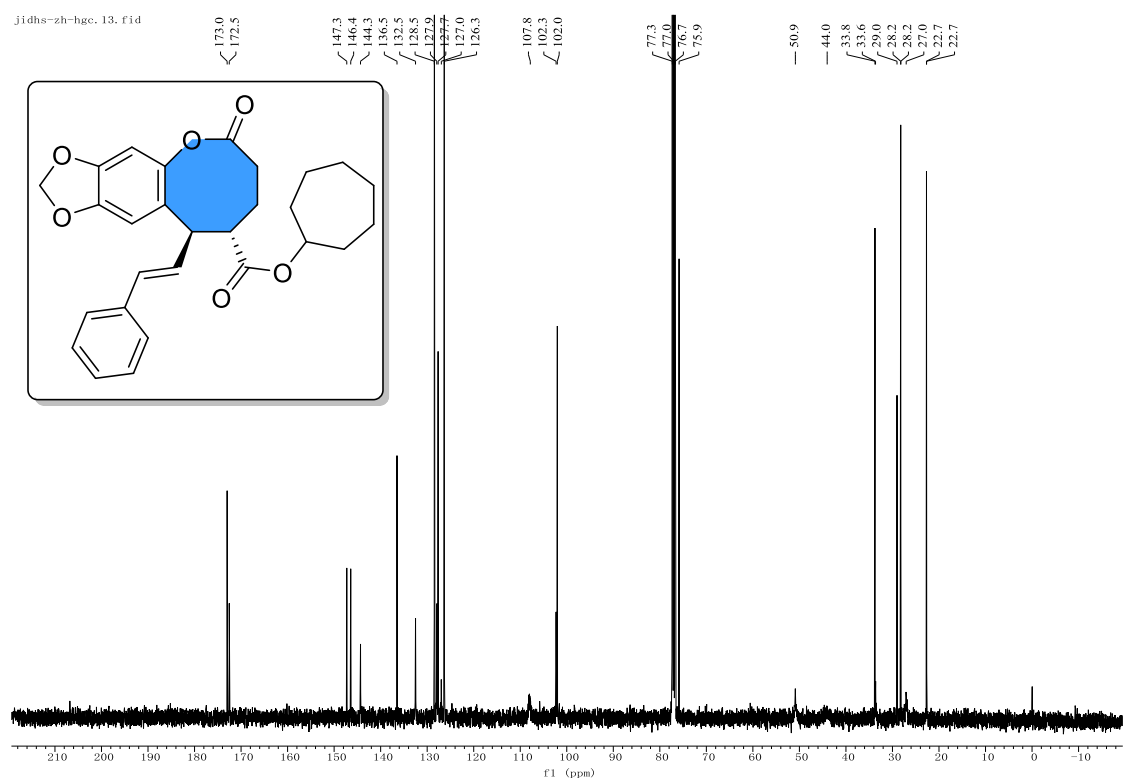

# HSQC

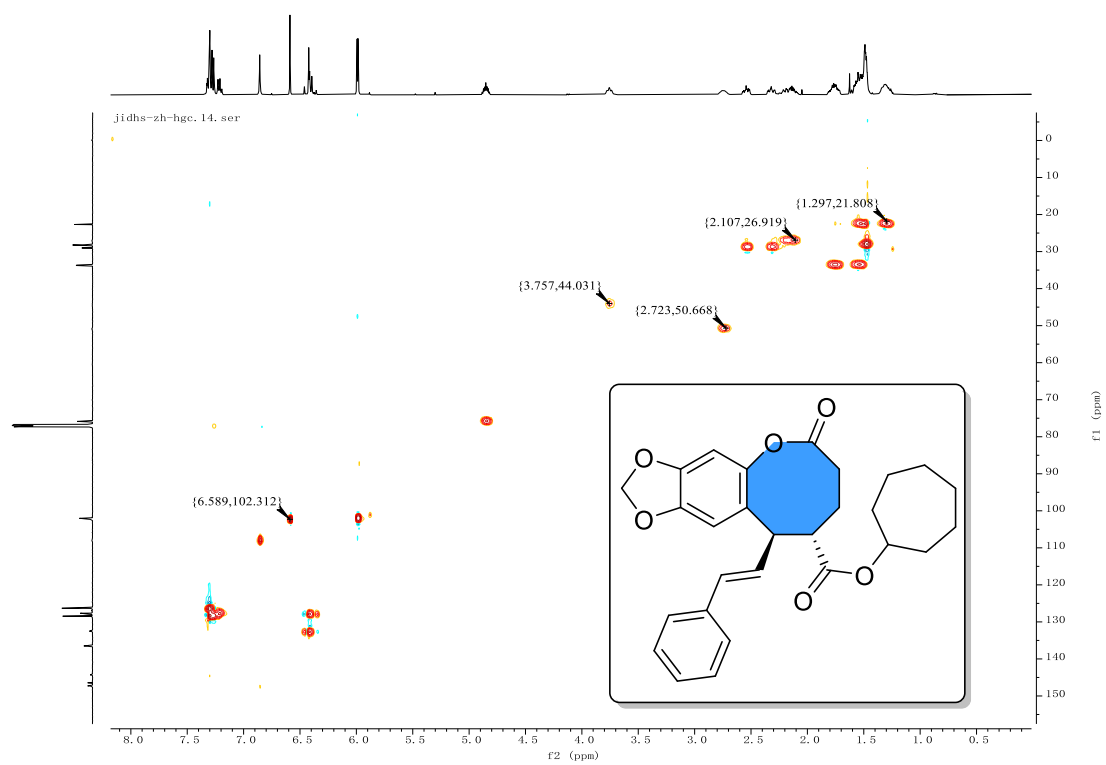

# Compound-3ma (<sup>1</sup>HNMR 400MHz, CDCl<sub>3</sub>)

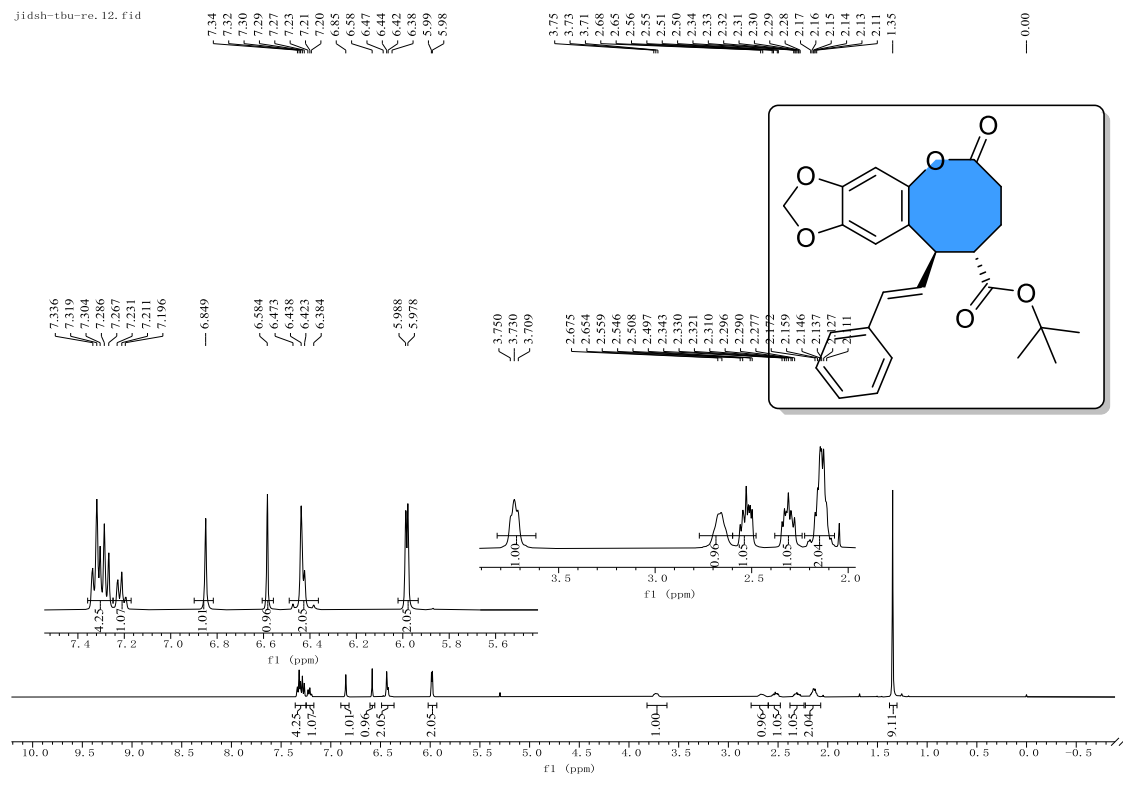

# <sup>13</sup>CNMR 101MHz, CDCl<sub>3</sub>

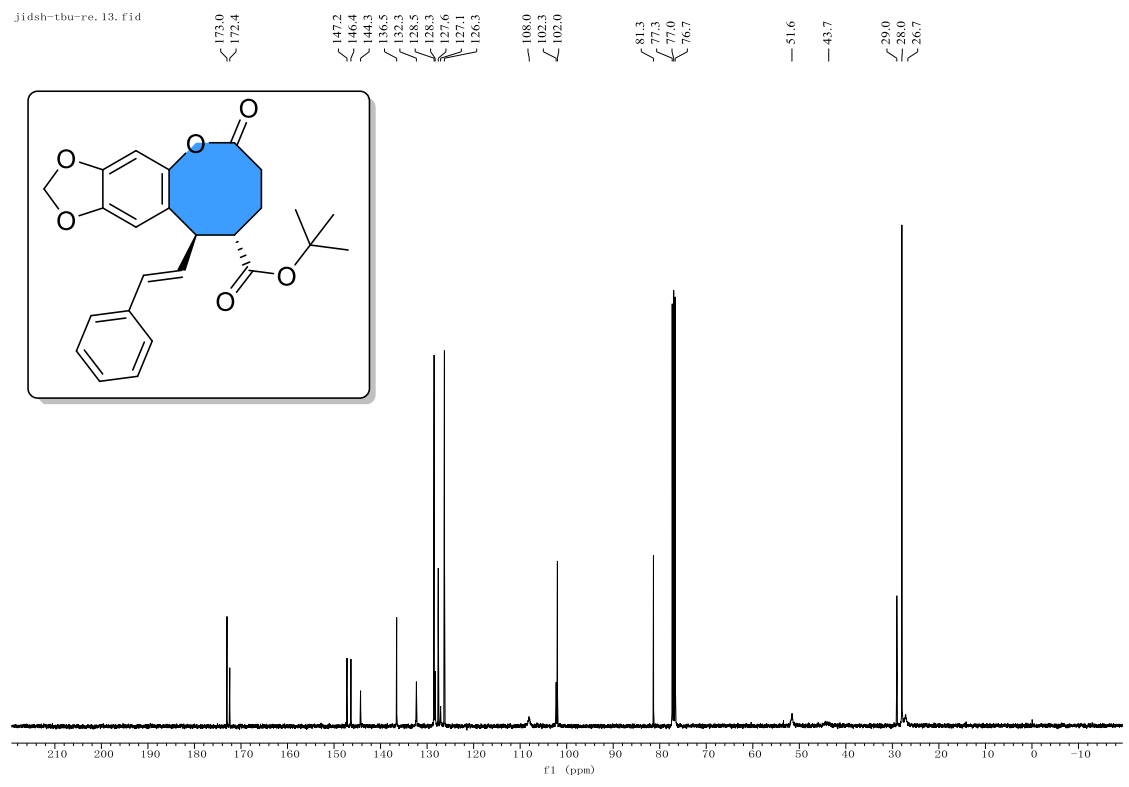

# HSQC

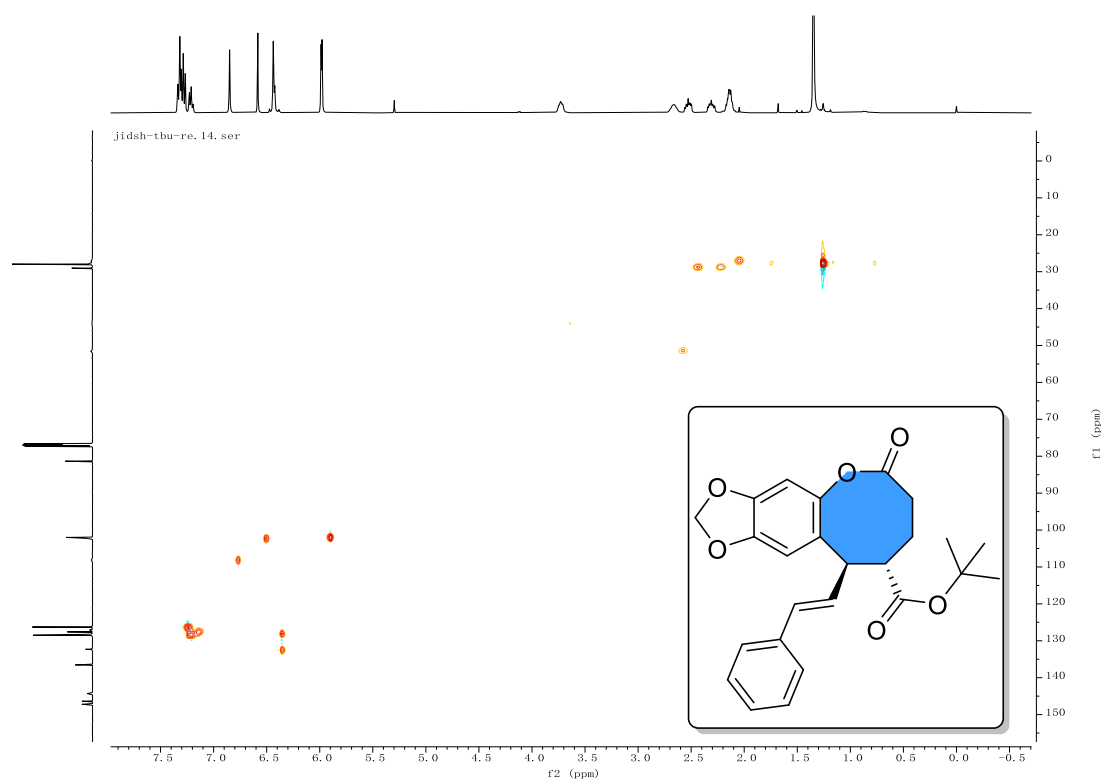



Compound-3na <sup>1</sup>H NMR (600 MHz, CD<sub>2</sub>Cl<sub>2</sub>)

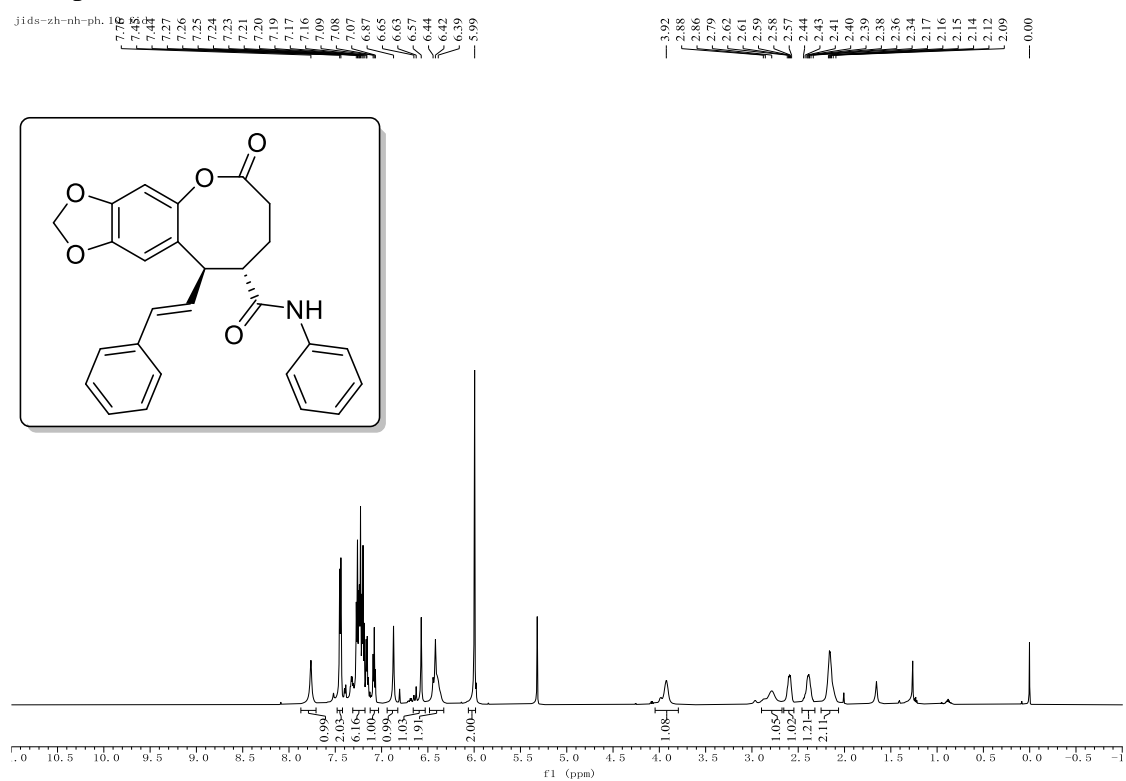

Compound-3na <sup>13</sup>C NMR (150 MHz, CD<sub>2</sub>Cl<sub>2</sub>)

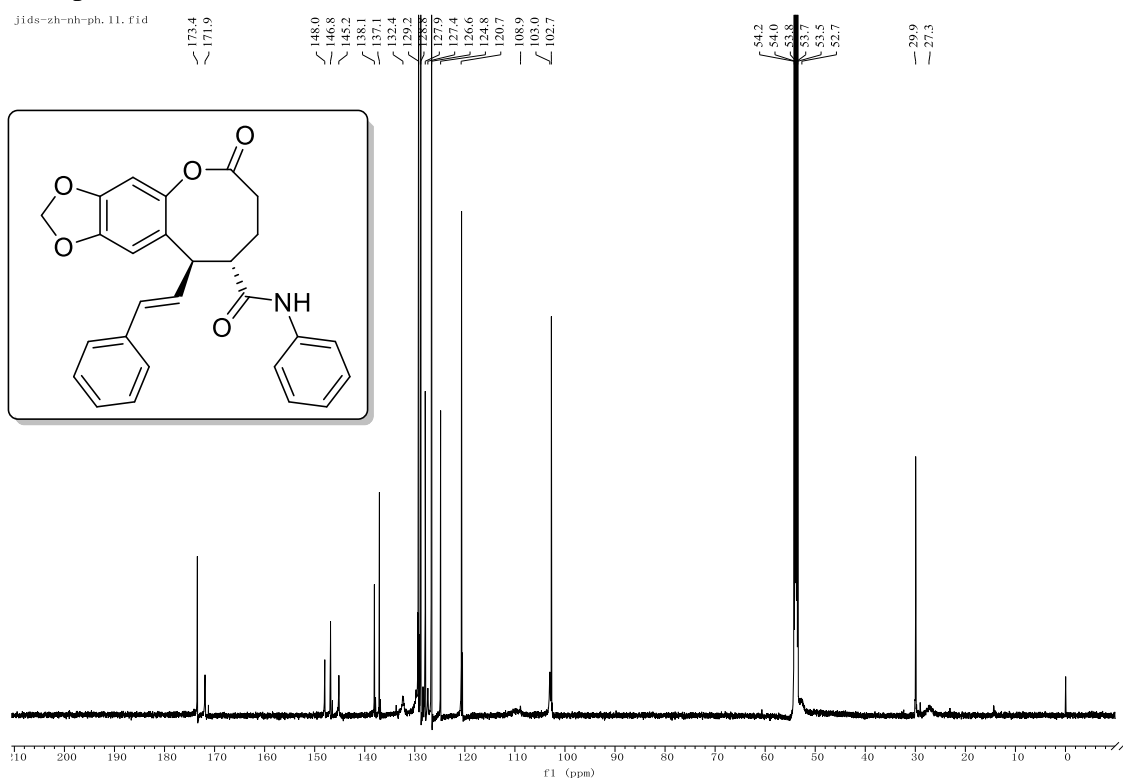

### Compound-3oa <sup>1</sup>H NMR (600 MHz, CD<sub>2</sub>Cl<sub>2</sub>)

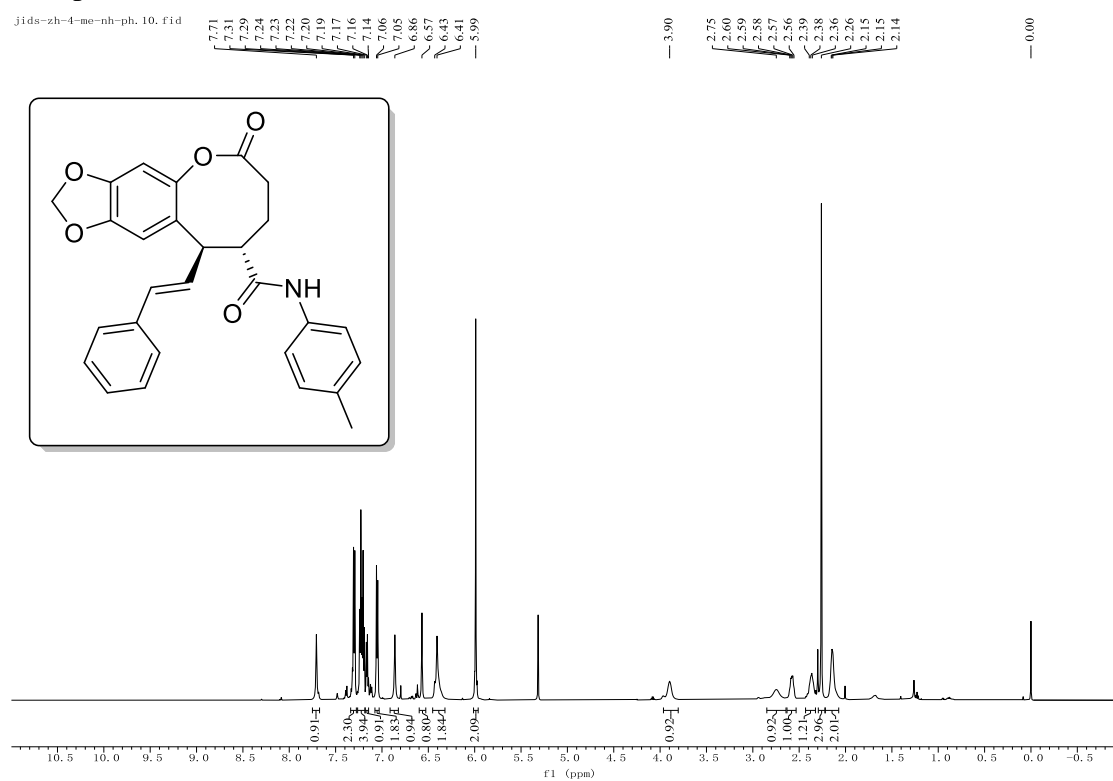

### Compound-3oa <sup>13</sup>C NMR (150 MHz, CD<sub>2</sub>Cl<sub>2</sub>)

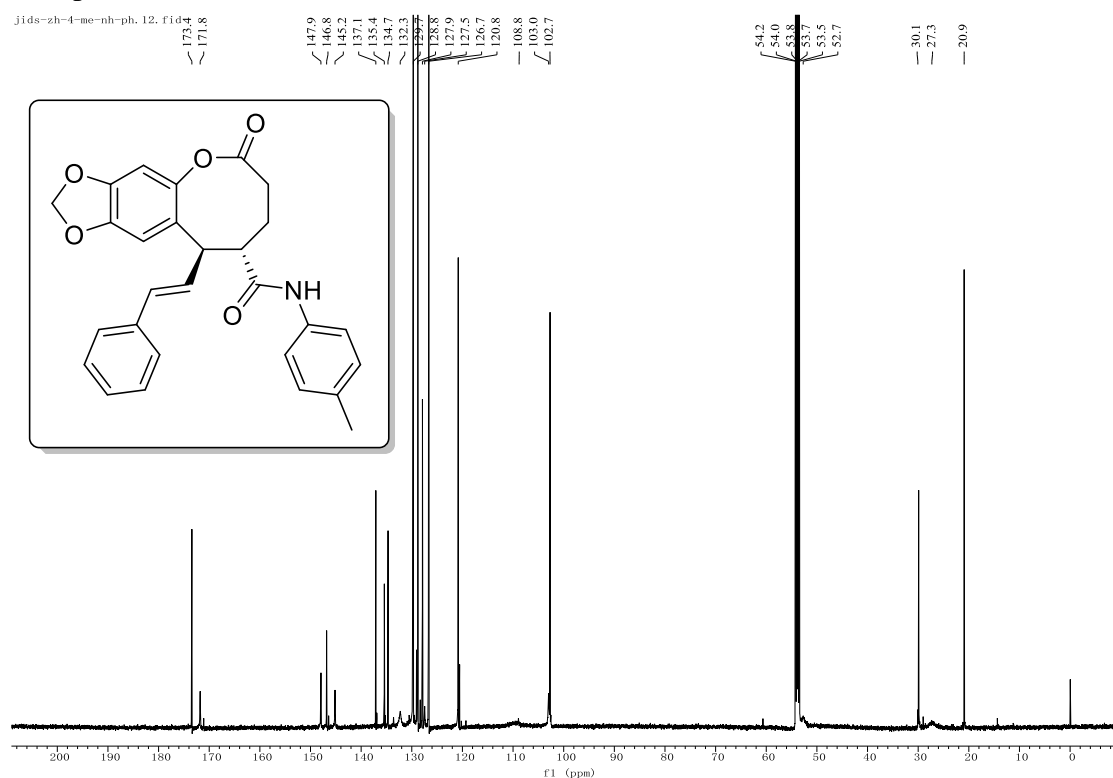

### Compound-3ab (<sup>1</sup>HNMR 400MHz, CDCl<sub>3</sub>)

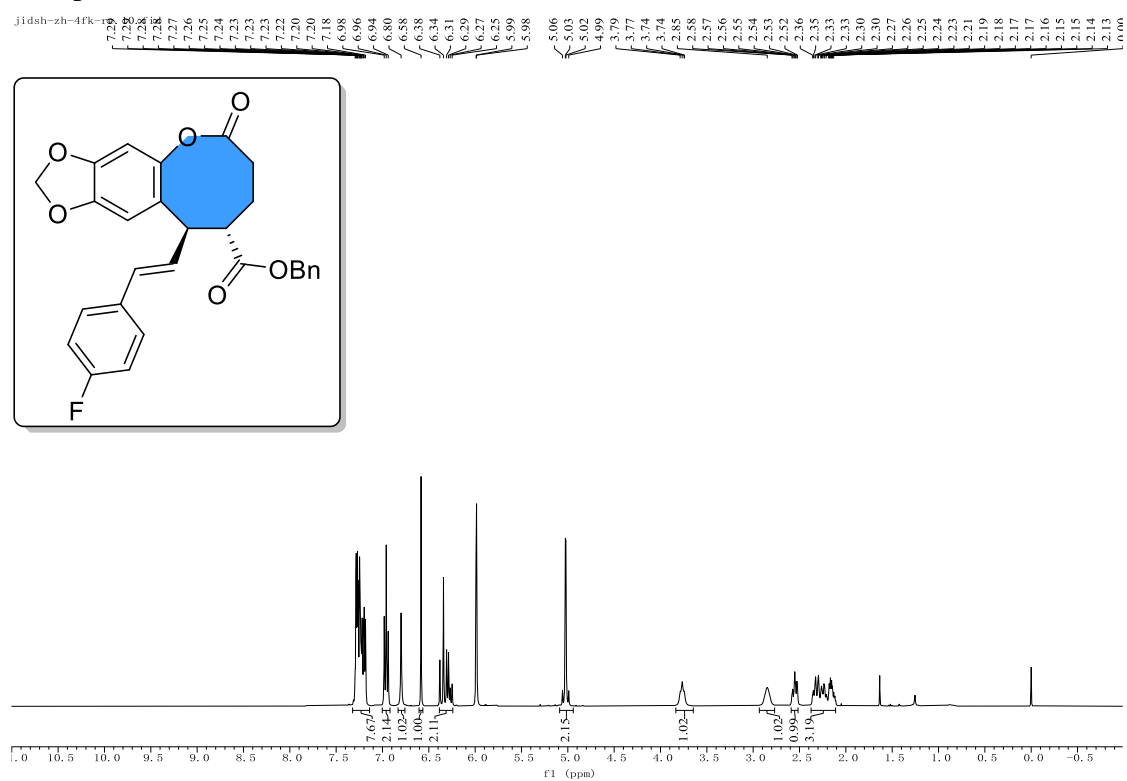

### Compound-3ab (<sup>13</sup>CNMR 101MHz, CDCl<sub>3</sub>)

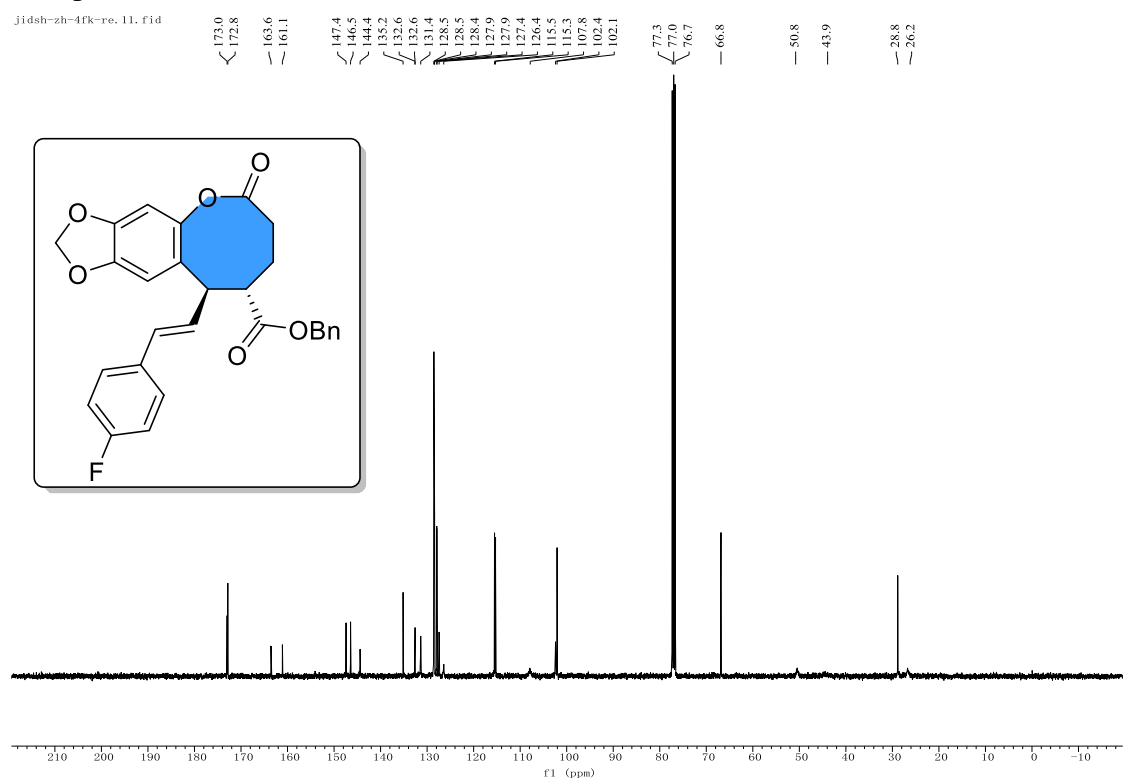

# HSQC

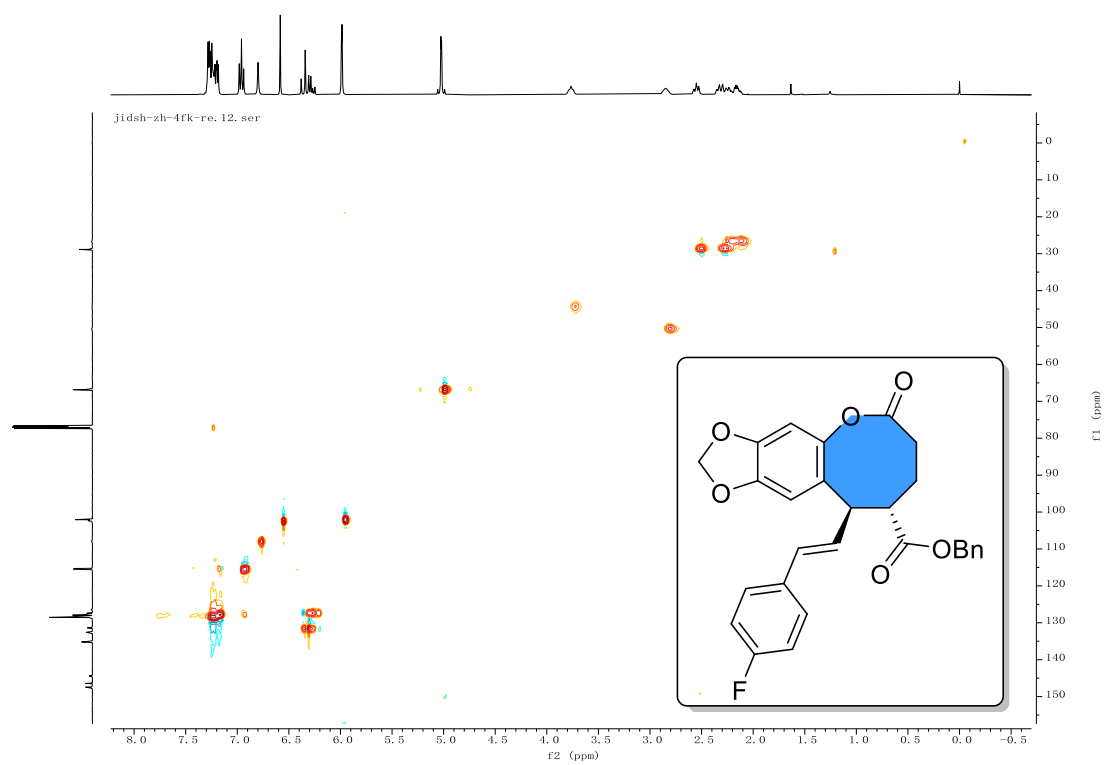

### Compound-3ac (<sup>1</sup>HNMR 400MHz, CDCl<sub>3</sub>)

jidsh-zh-4cl-k-re, 10. fid

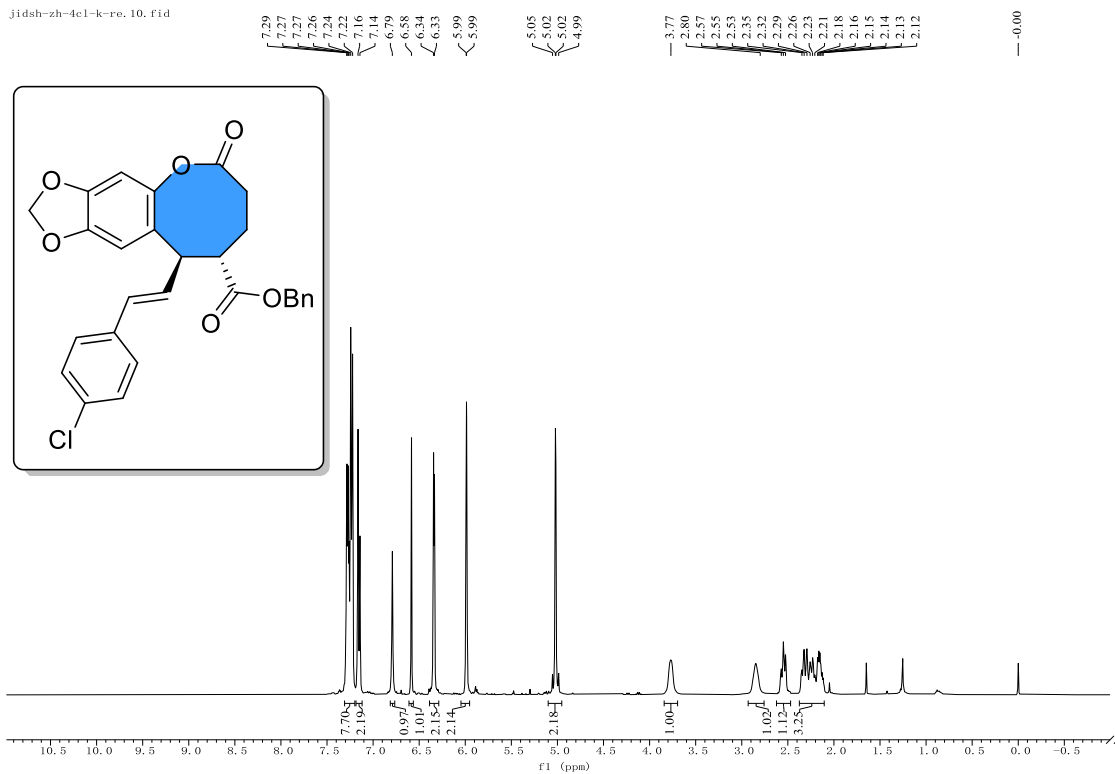

### Compound-3ac (<sup>13</sup>CNMR 101MHz, CDCl<sub>3</sub>)

jidsh-zh-4cl-k-re, 11. fid

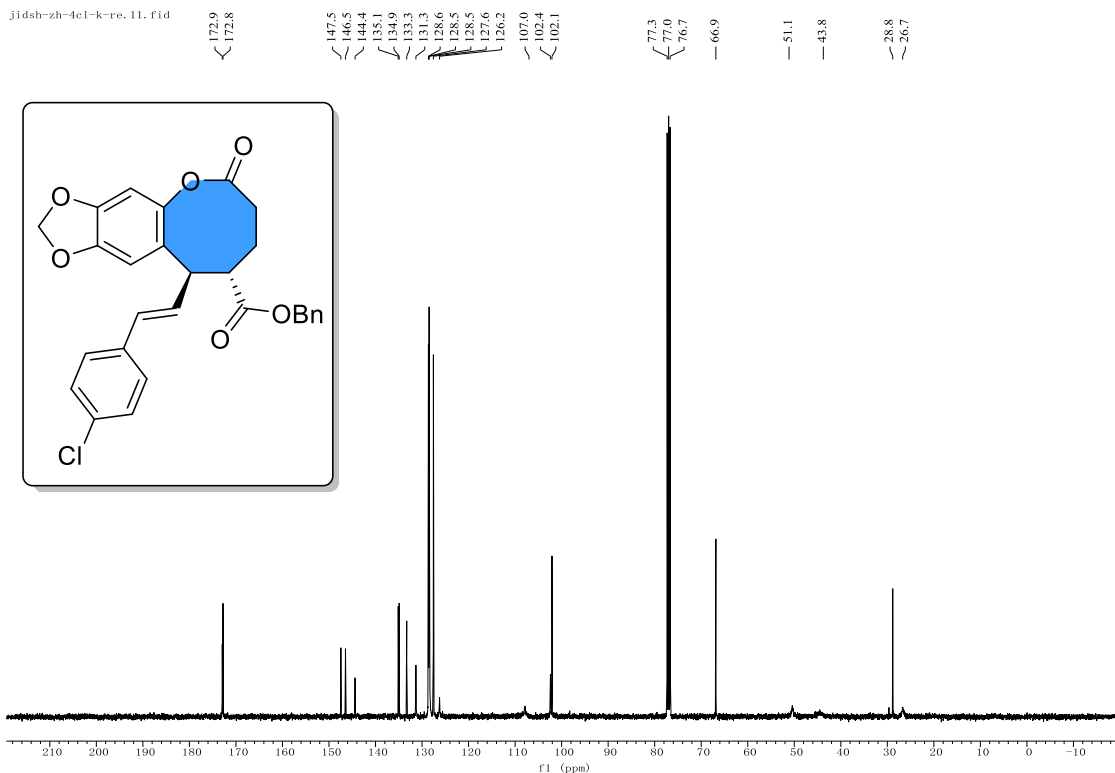

# HSQC

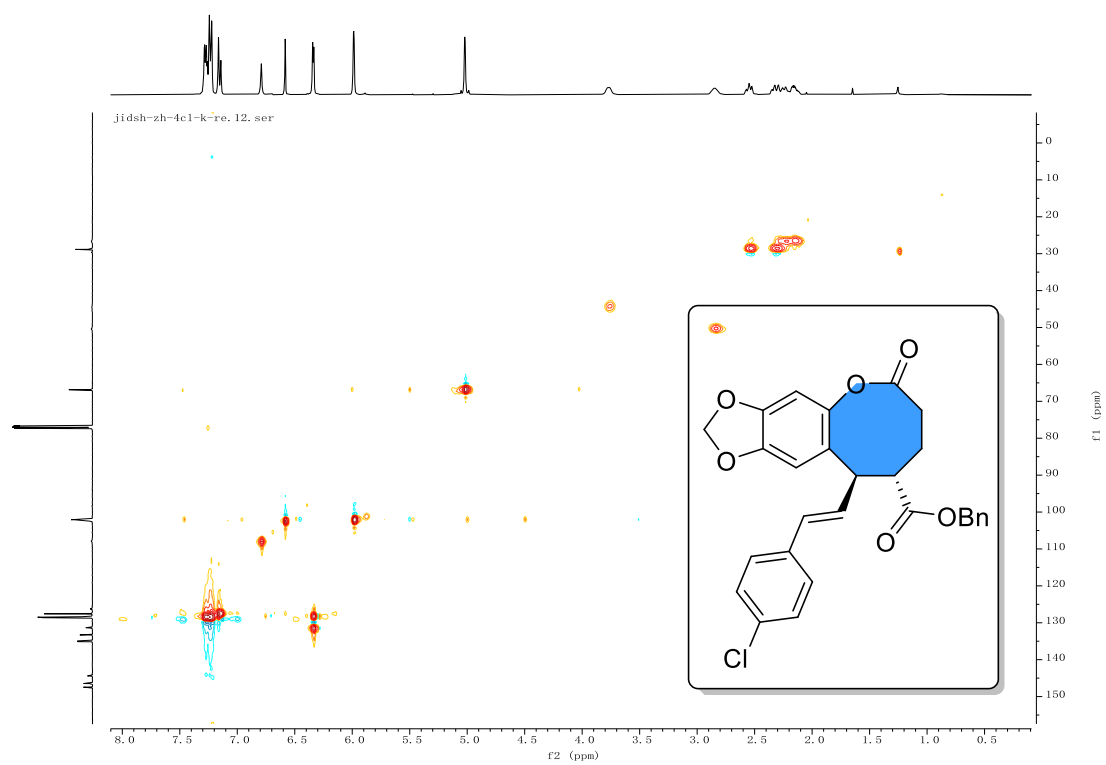

### Compound-3ad (<sup>1</sup>HNMR 400MHz, CDCl<sub>3</sub>)

jidsh-4-br-k-cbz. 11. F1d

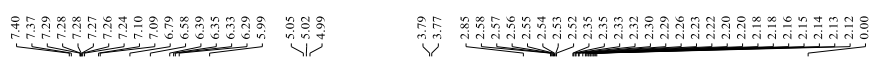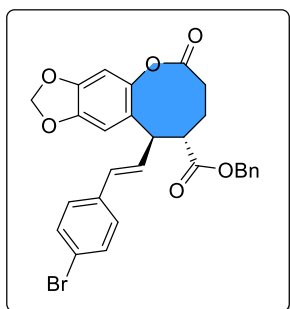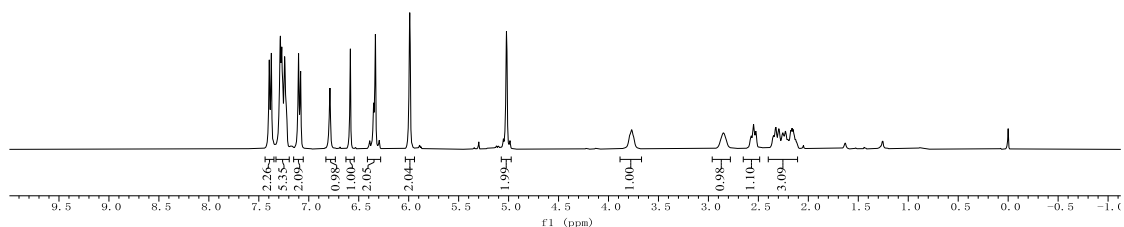

### Compound-3ad <sup>13</sup>CNMR 101MHz, CDCl<sub>3</sub>

jidsh-4-br-k-cbz. 12. F1d

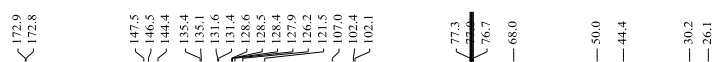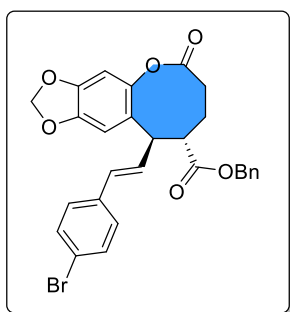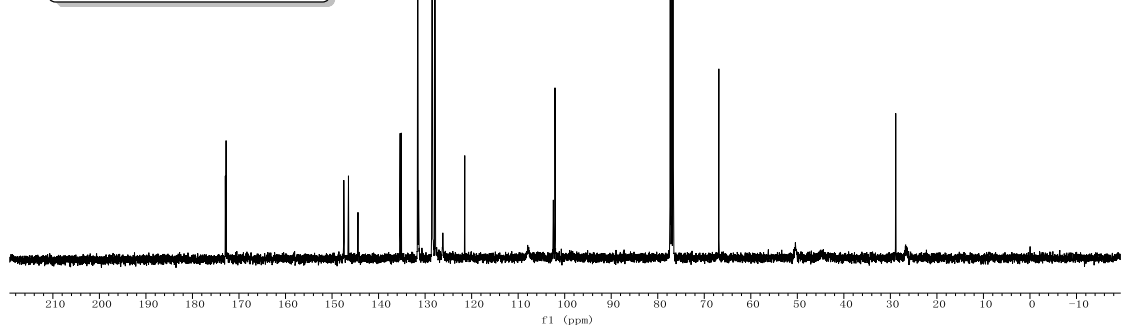

# HSQC

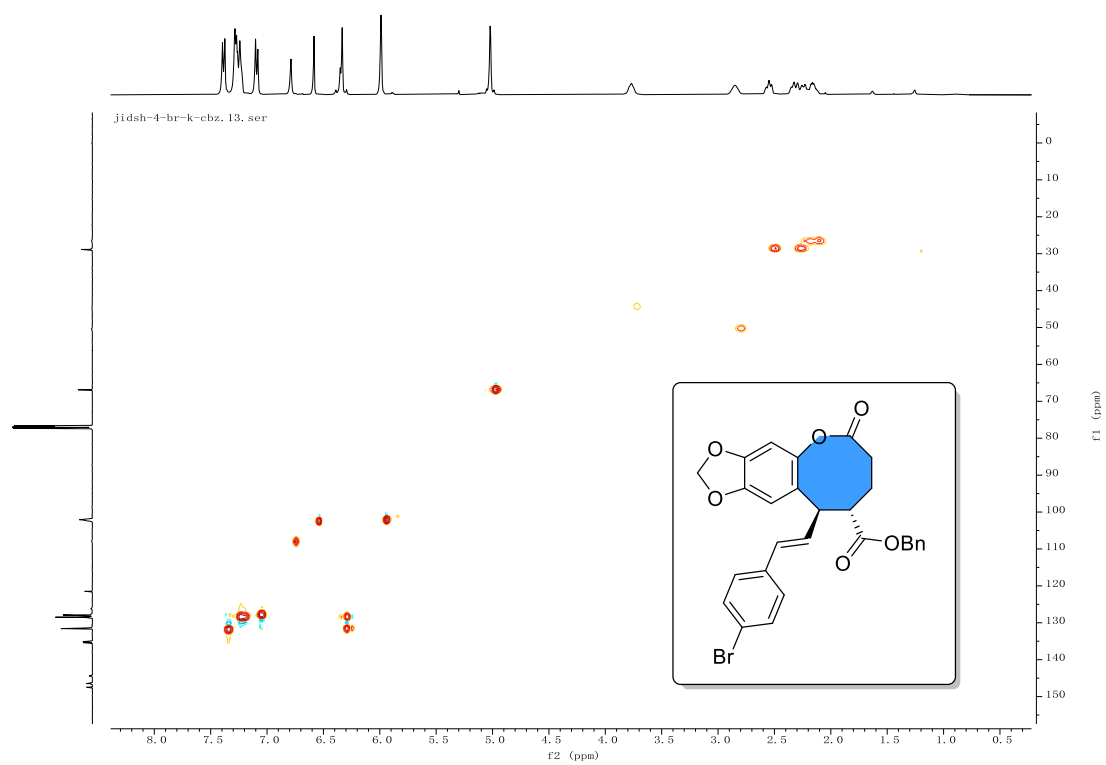



Compound-3ae (<sup>1</sup>HNMR 400MHz, CDCl<sub>3</sub>)

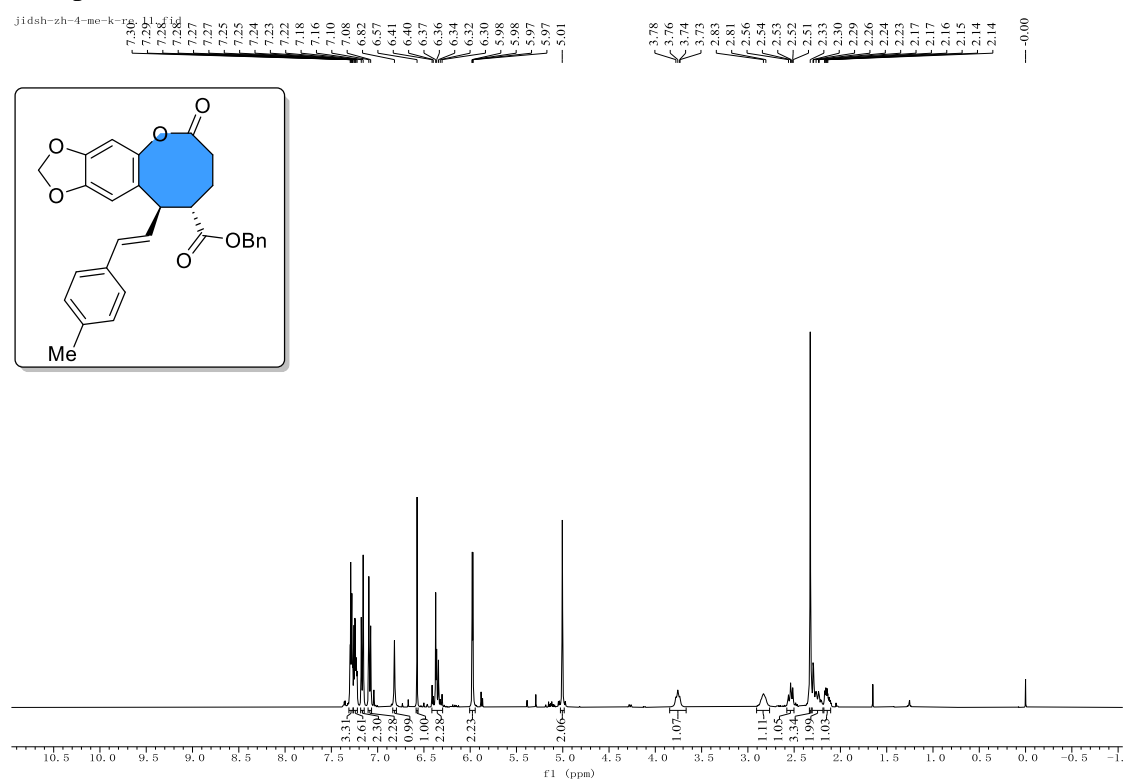

Compound-3ae (<sup>13</sup>CNMR 101MHz, CDCl<sub>3</sub>)

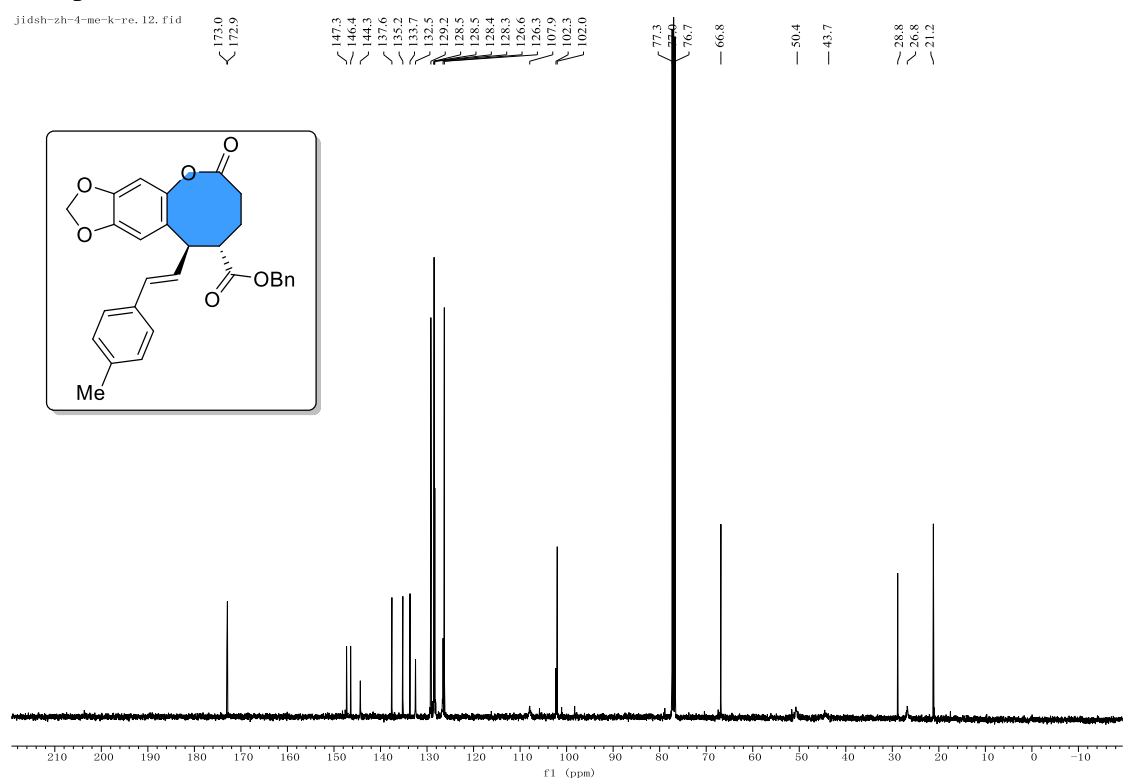

Compound-3ae HSQC (<sup>1</sup>HNMR 400MHz, CDCl<sub>3</sub>)

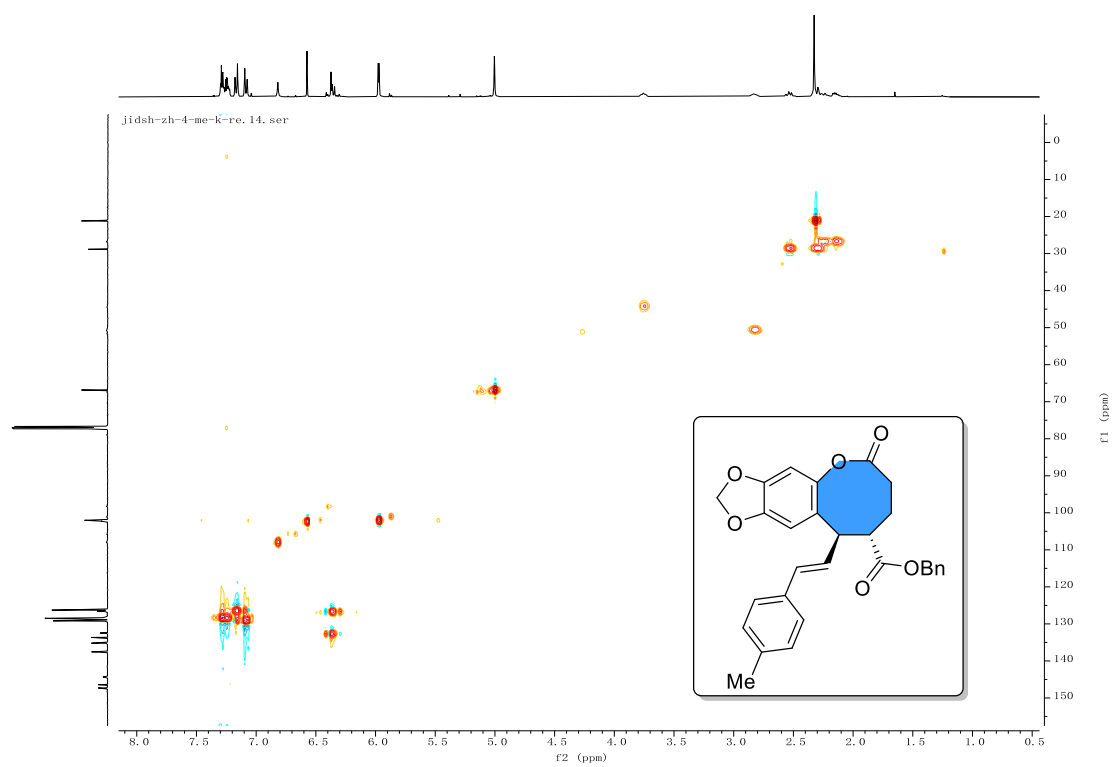

Compound-3af ( $^1\text{H}$ NMR 400MHz,  $\text{CDCl}_3$ )

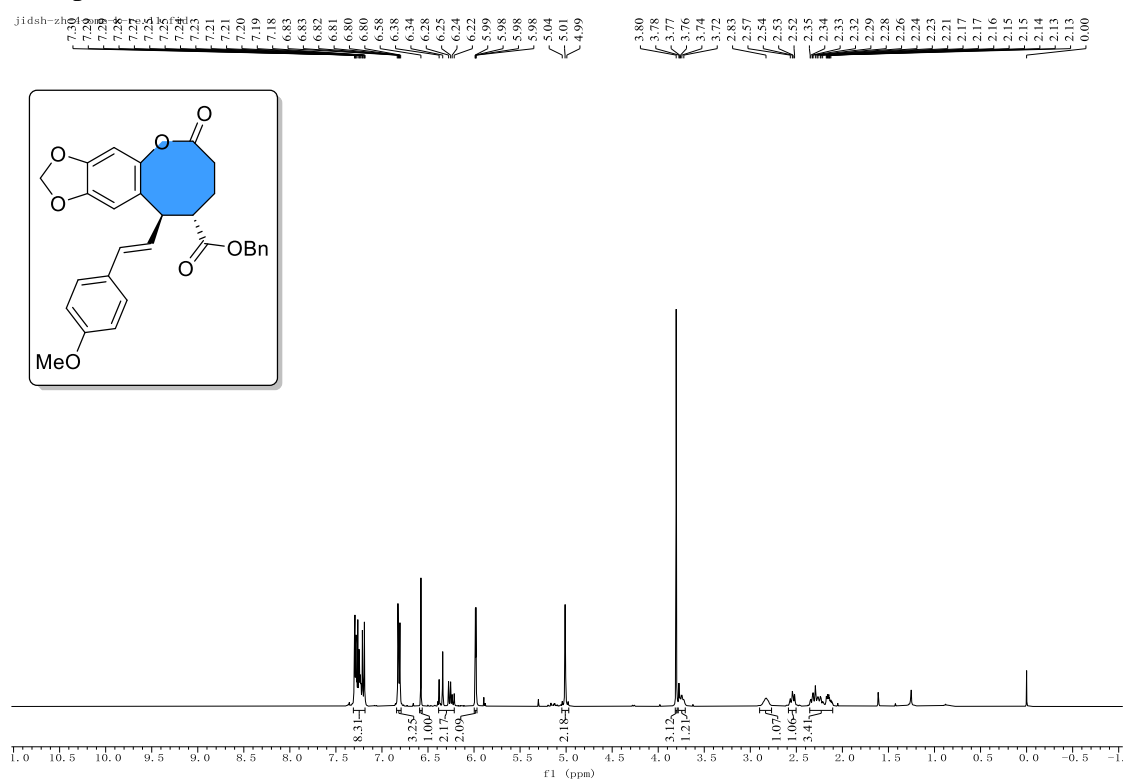

Compound-3af ( $^{13}\text{C}$ NMR 101MHz,  $\text{CDCl}_3$ )

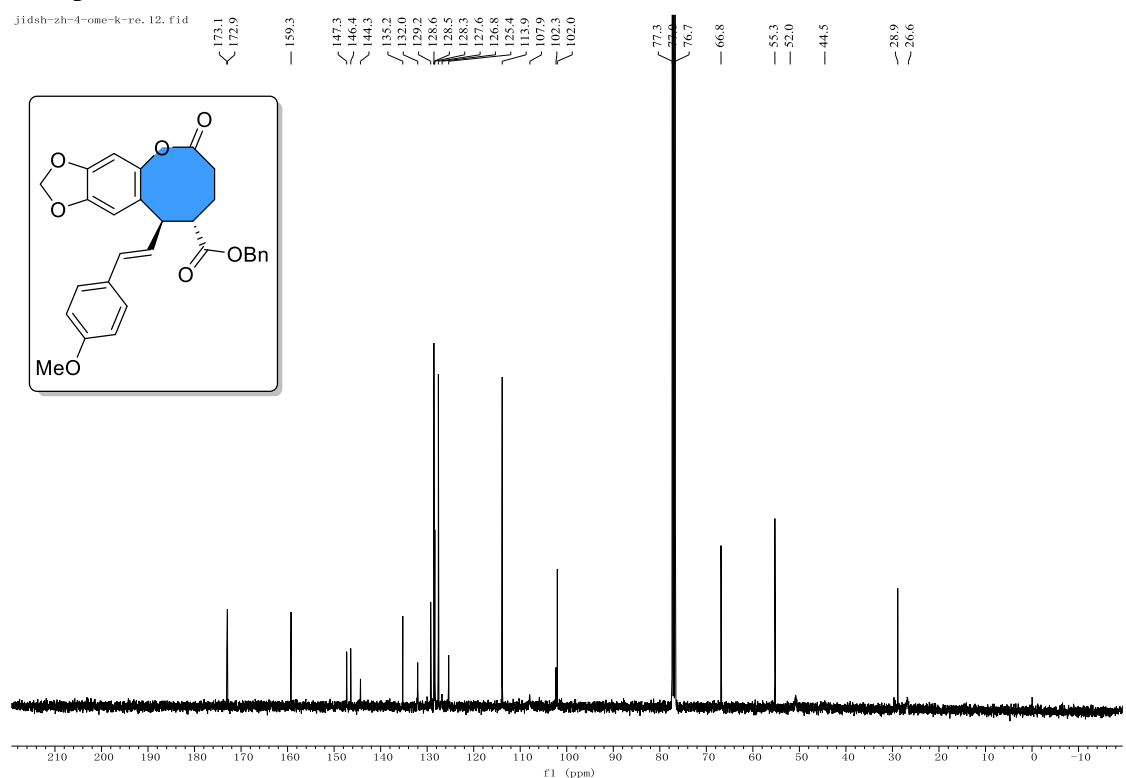

# Compound-3af HSQC

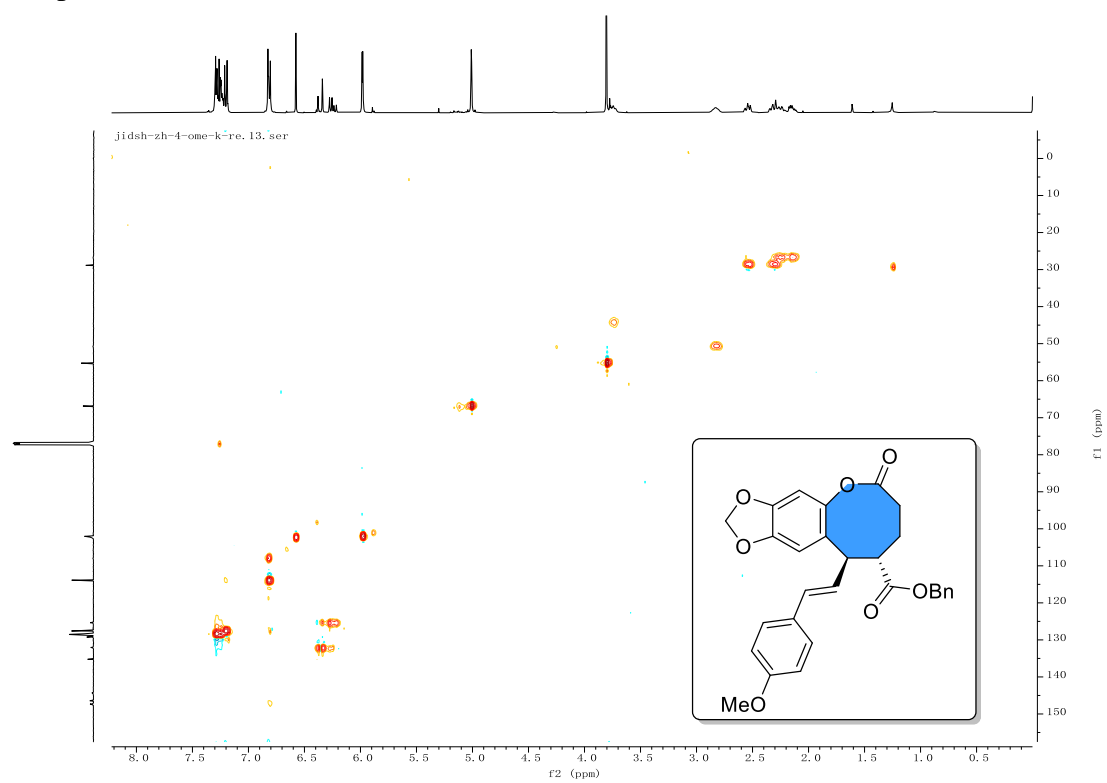

Compound-3ag (<sup>1</sup>HNMR 400MHz, CDCl<sub>3</sub>)

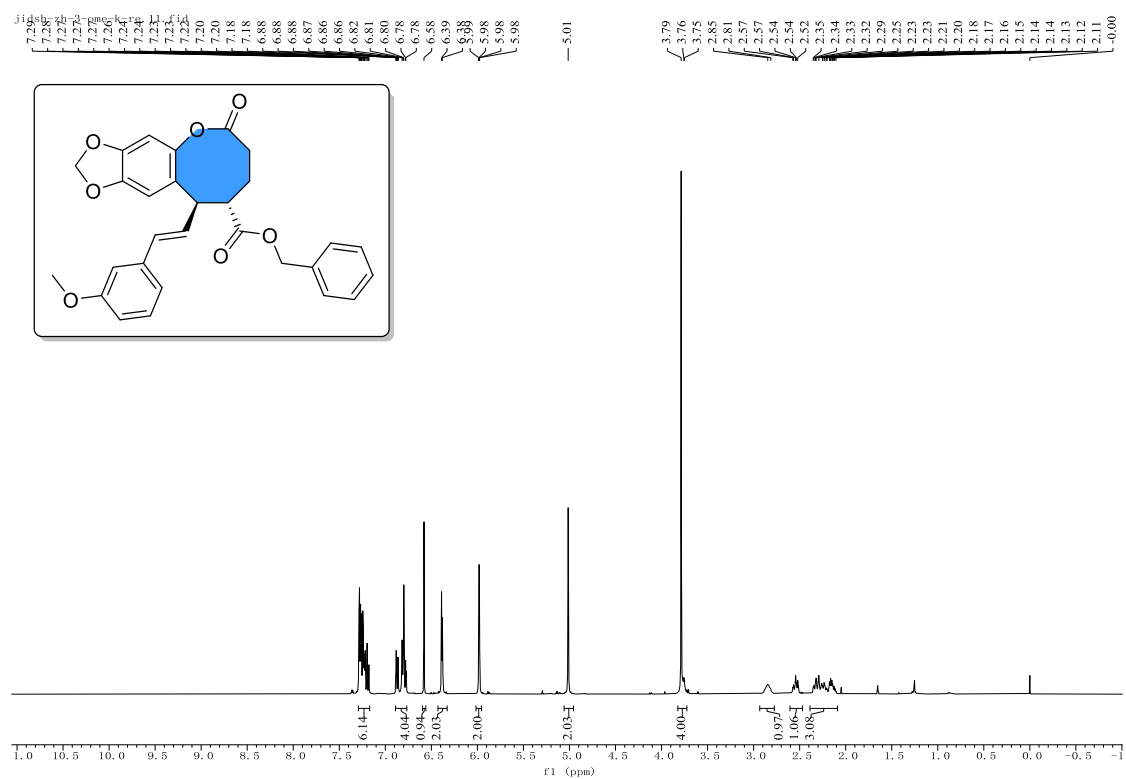

Compound-3ag (<sup>13</sup>CNMR 101MHz, CDCl<sub>3</sub>)

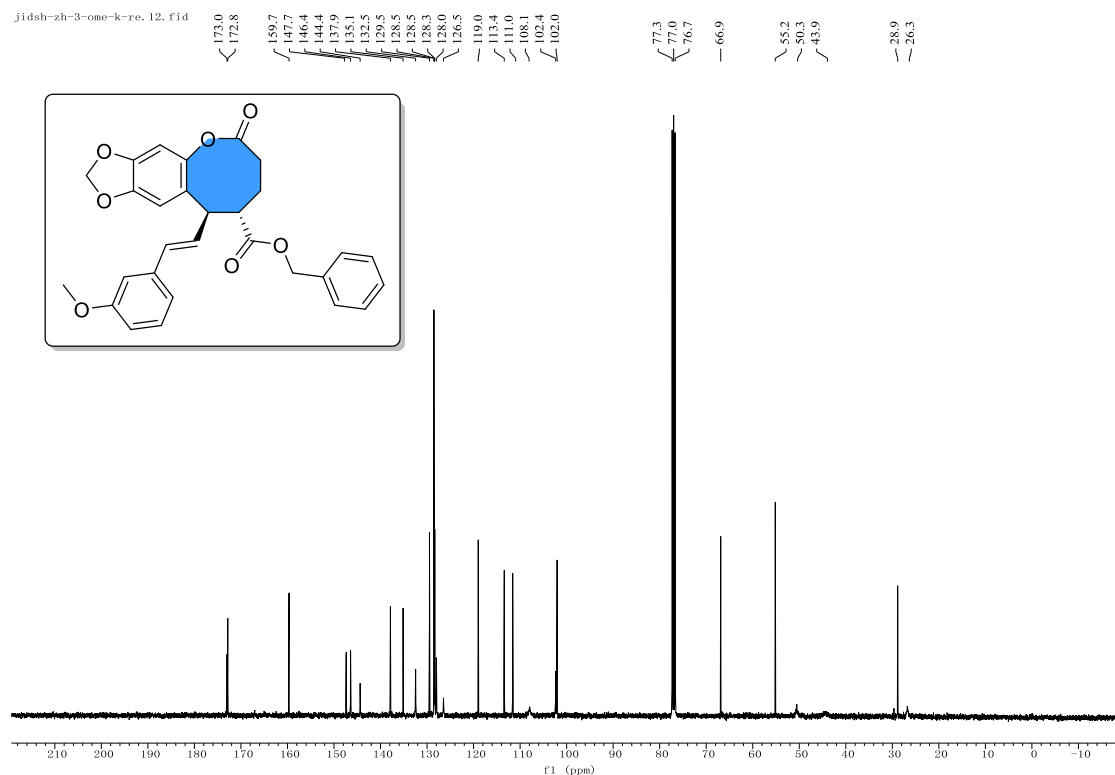

# Compound-3ag HSQC

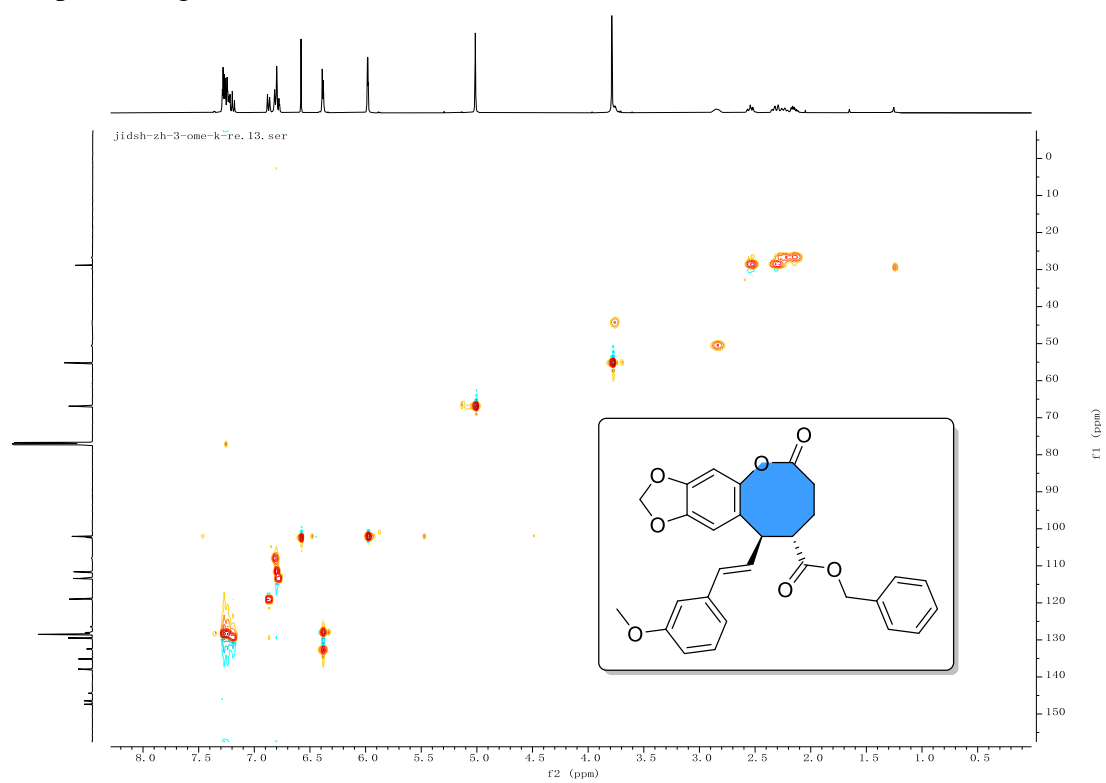

Compound-3ah ( $^1\text{H}$ NMR 400MHz,  $\text{CDCl}_3$ )

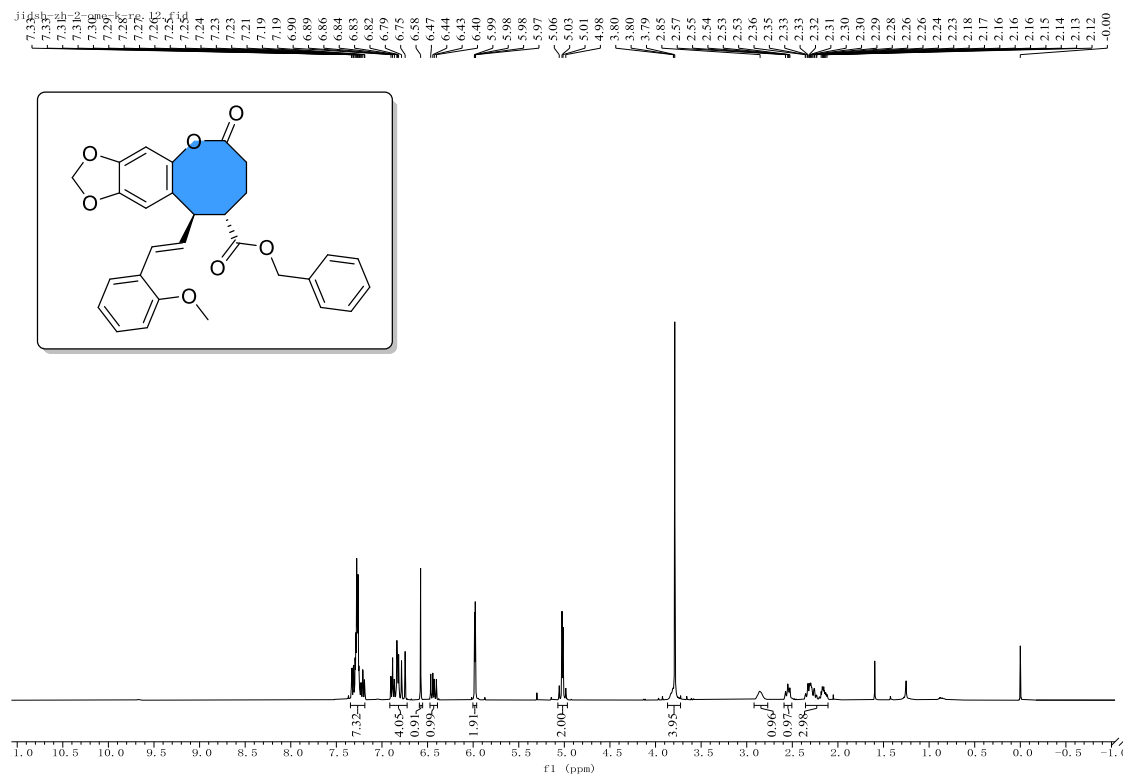

Compound-3ah  $^{13}\text{C}$ NMR (101MHz,  $\text{CDCl}_3$ )

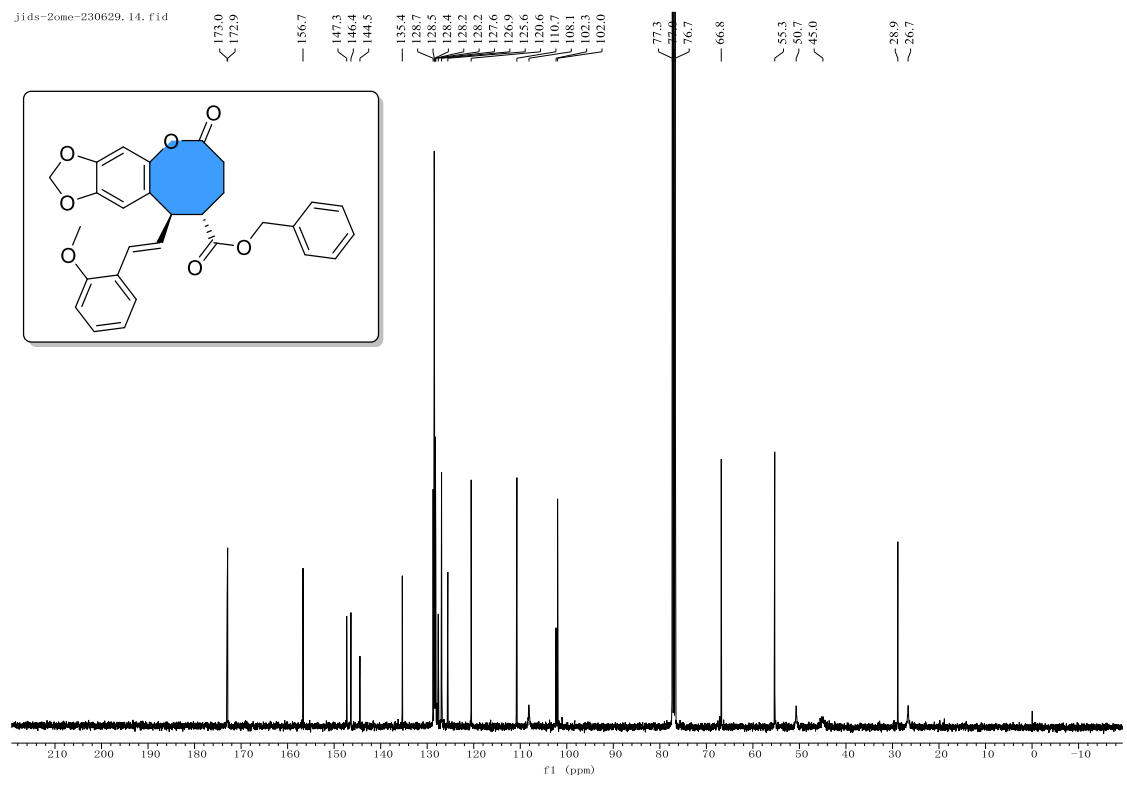

# HSQC

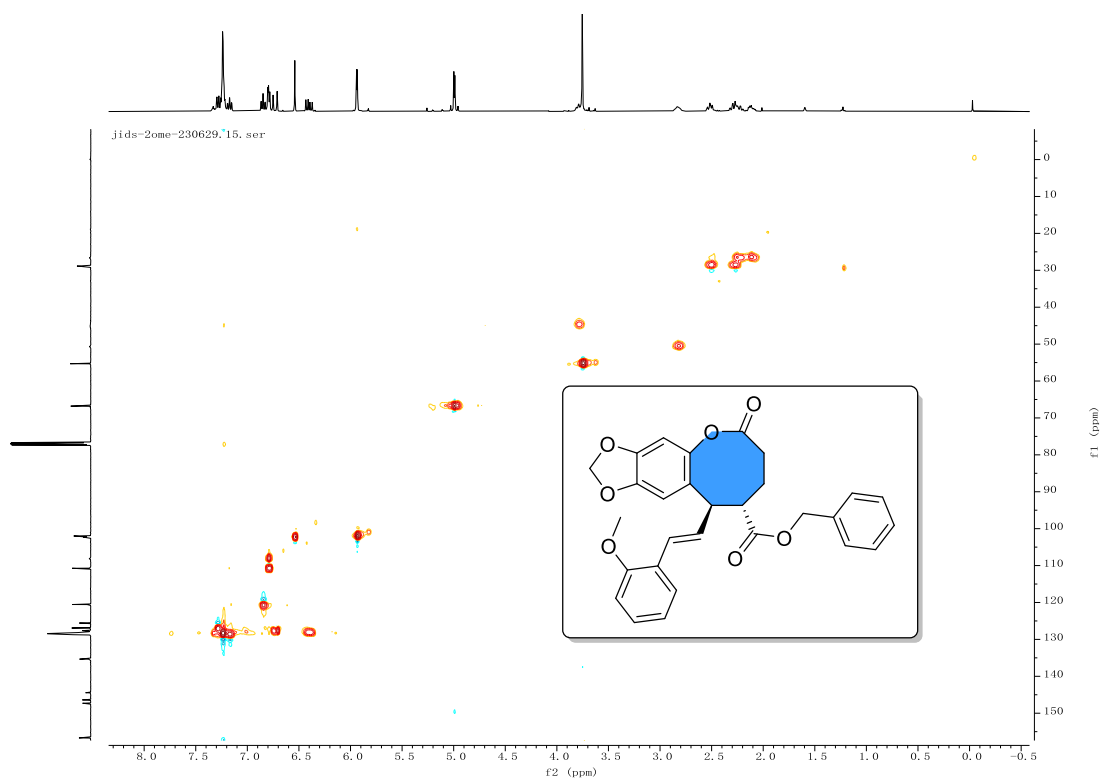



### Compound-3ai <sup>1</sup>H NMR (600 MHz, CDCl<sub>3</sub>)

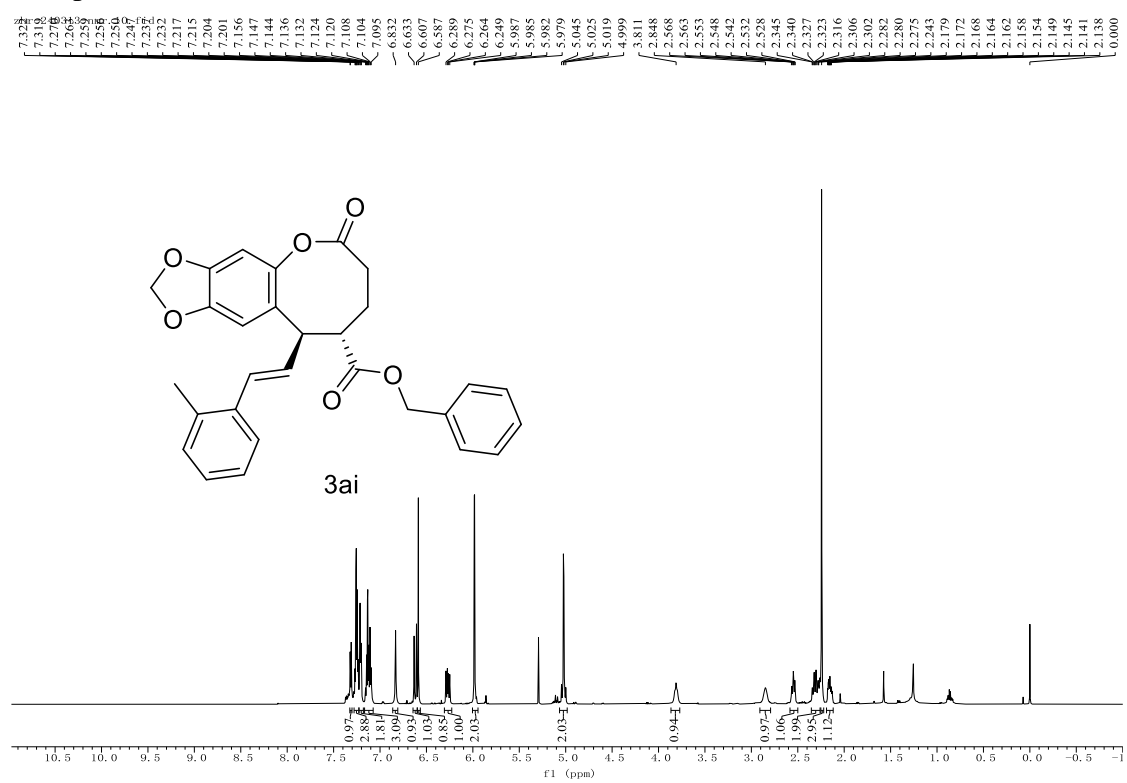

### Compound-3ai <sup>13</sup>C NMR (150 MHz, CDCl<sub>3</sub>)

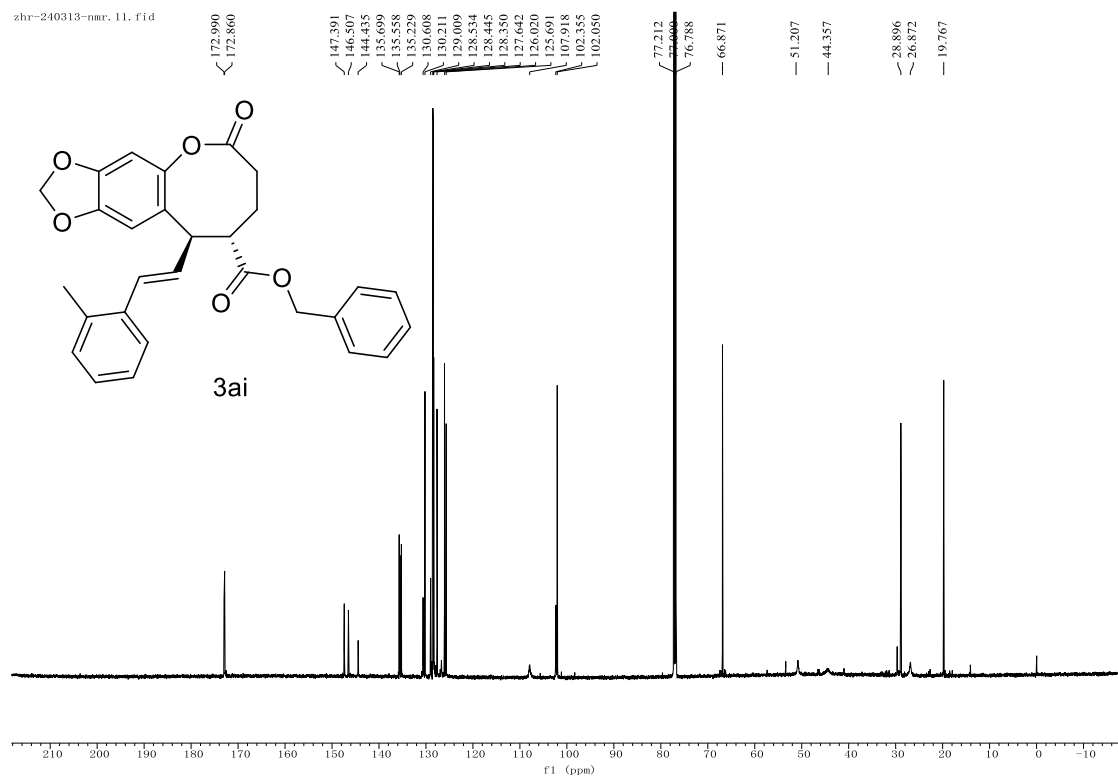

# HSQC-3ai

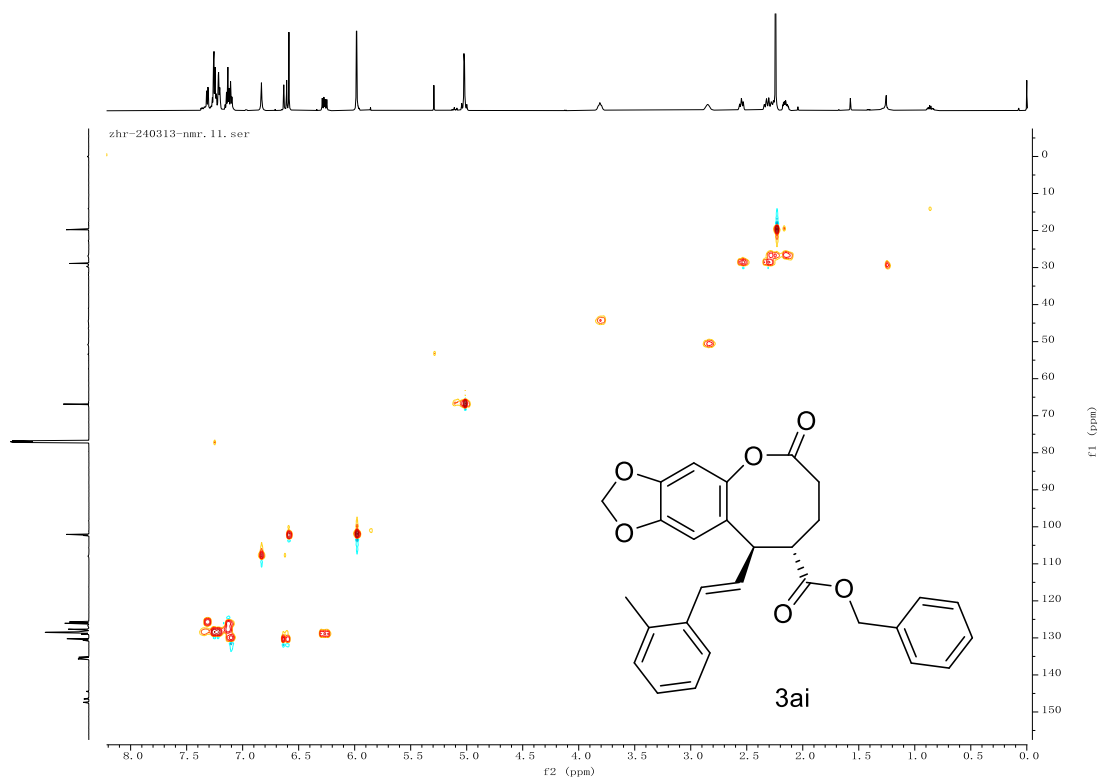

Compound-3aj (<sup>1</sup>HNMR 400MHz, CDCl<sub>3</sub>)

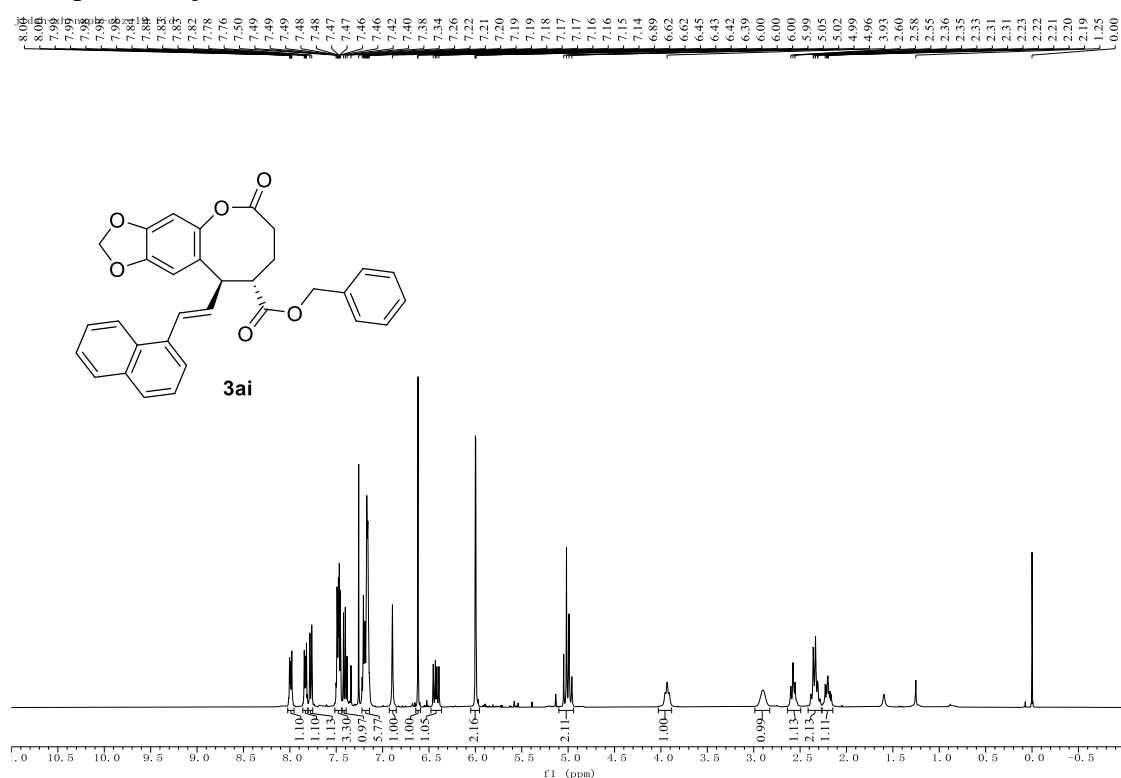

Compound-3aj <sup>13</sup>CNMR (101MHz, CDCl<sub>3</sub>)

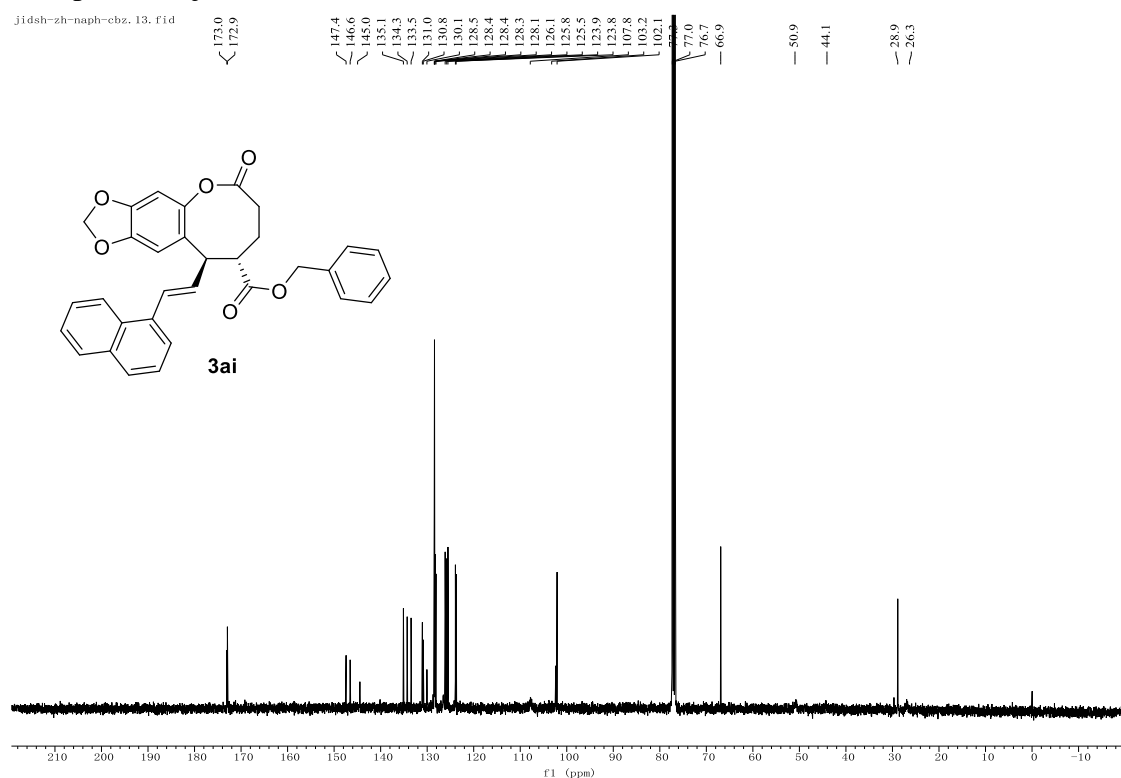

# HSQC Compound-3aj

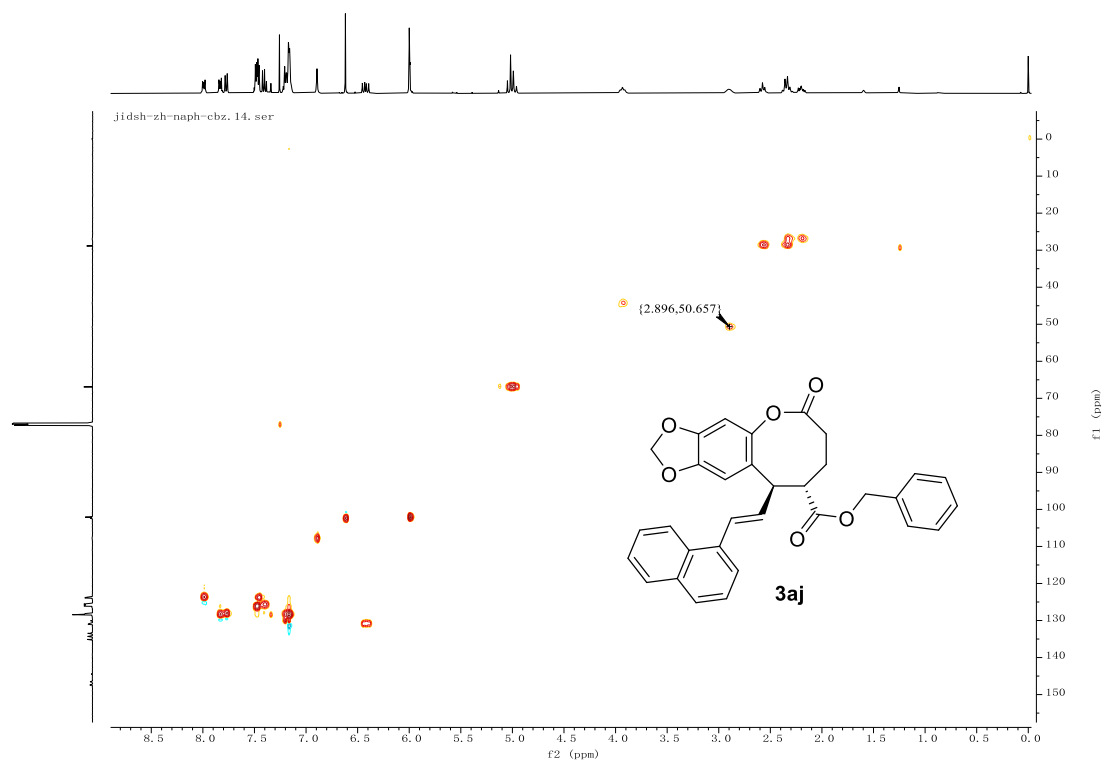

<sup>1</sup>H NMR 400MHz, CDCl<sub>3</sub> Compound-4

8.06, 8.04, 7.98, 7.96, 7.94, 7.44, 7.38, 7.33, 7.30, 7.30, 7.27, 7.25, 7.23, 7.22, 6.79, 6.58, 6.46, 6.42, 6.41, 6.39, 6.35, 6.00, 6.00, 5.99, 5.15, 5.15, 5.10, 5.06, 3.80, 3.79, 3.77, 2.89, 2.85, 2.85, 2.80, 2.80, 2.56, 2.56, 2.54, 2.53, 2.52, 2.51, 2.50, 2.45, 2.45, 2.36, 2.35, 2.33, 2.33, 2.30, 2.29, 2.26, 2.25, 2.25, 2.22, 2.20, 2.19, 2.17, 2.16, 2.13, 2.13, 2.11, 2.10, 2.09, 2.08, 2.06, -0.00

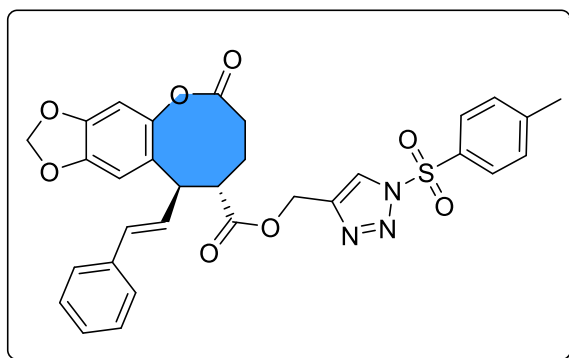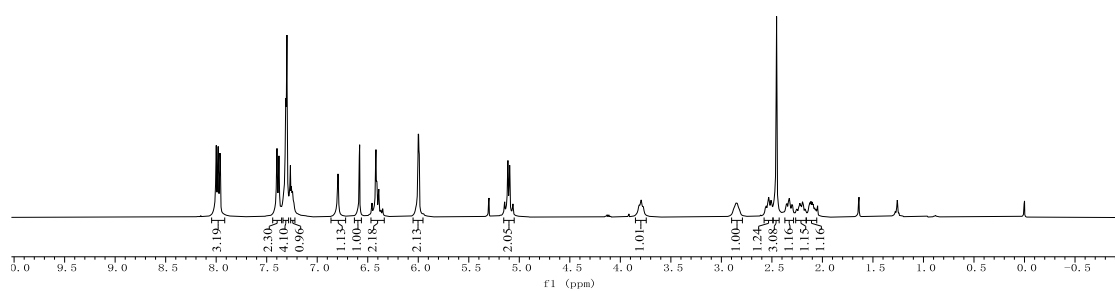

<sup>13</sup>C NMR 101MHz, CDCl<sub>3</sub>

jidsh-zh-djfy.12.fid

172.8, 172.7, 147.5, 146.5, 144.5, 141.9, 136.3, 132.7, 132.6, 130.5, 128.7, 127.9, 127.5, 126.3, 126.0, 123.5, 108.1, 102.4, 102.1, 77.3, 77.0, 76.7, 57.3, 49.9, 45.2, 28.4, 26.4, 21.1

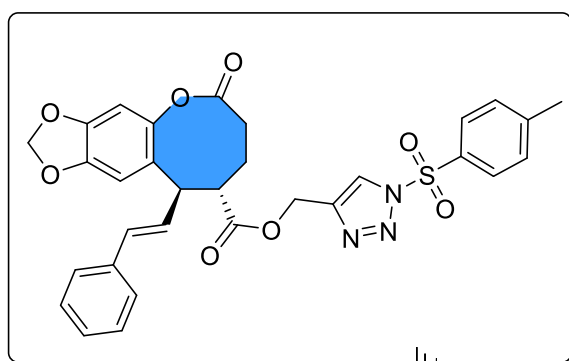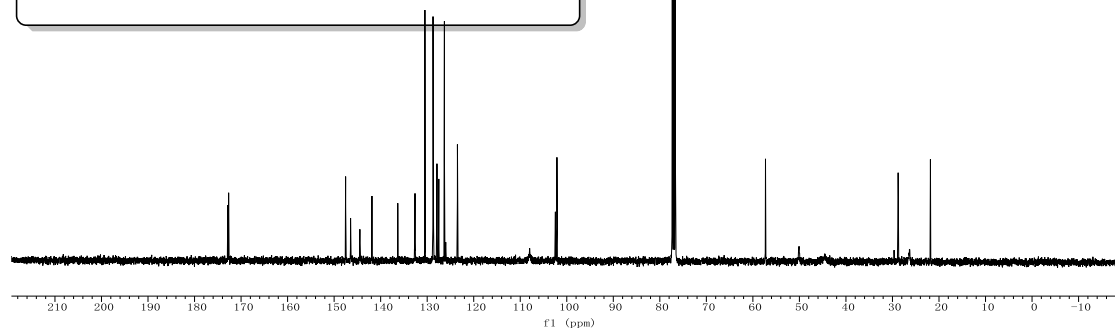

Compound-5 ( $^1\text{H}$ NMR 400MHz,  $\text{CDCl}_3$ )

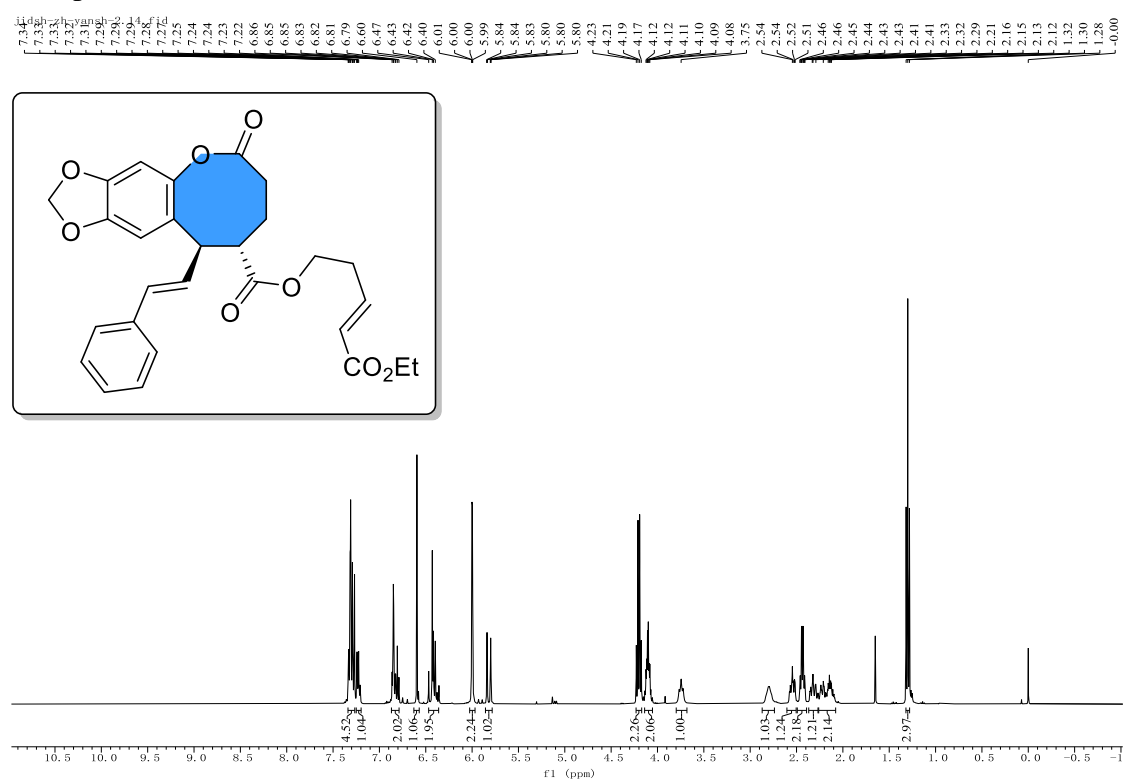

Compound-5 ( $^{13}\text{C}$ NMR 400MHz,  $\text{CDCl}_3$ )

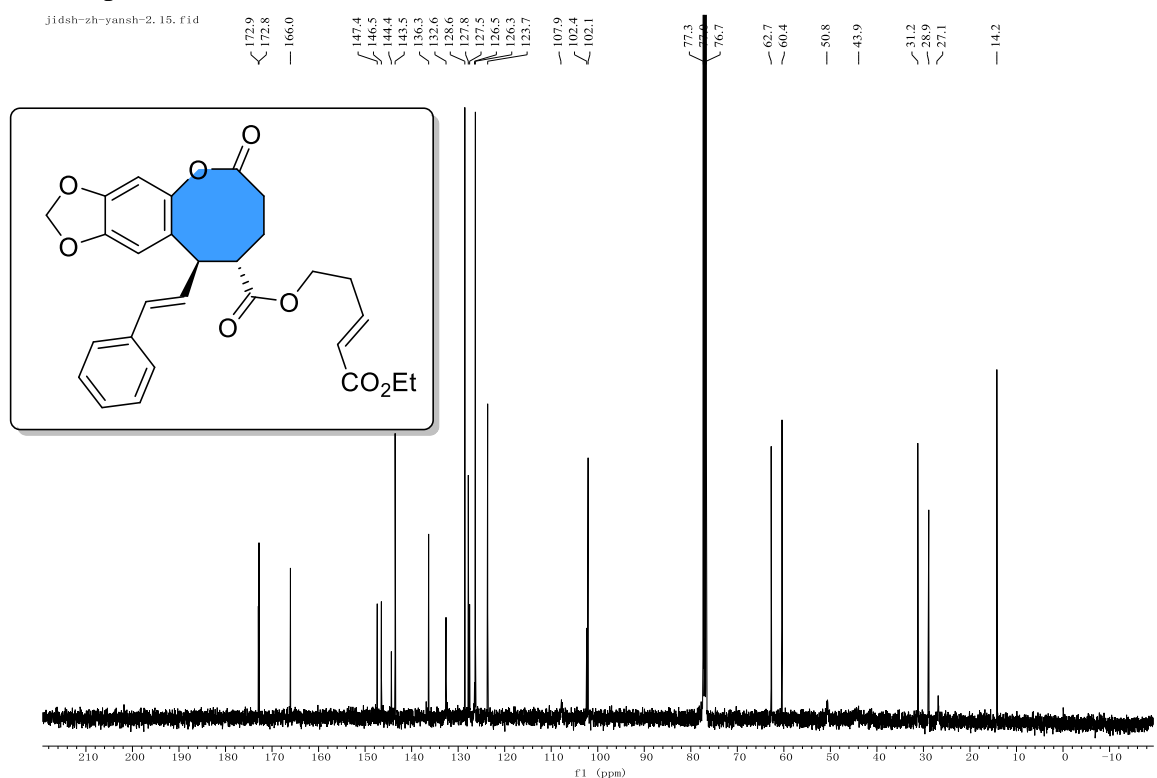

# HSQC

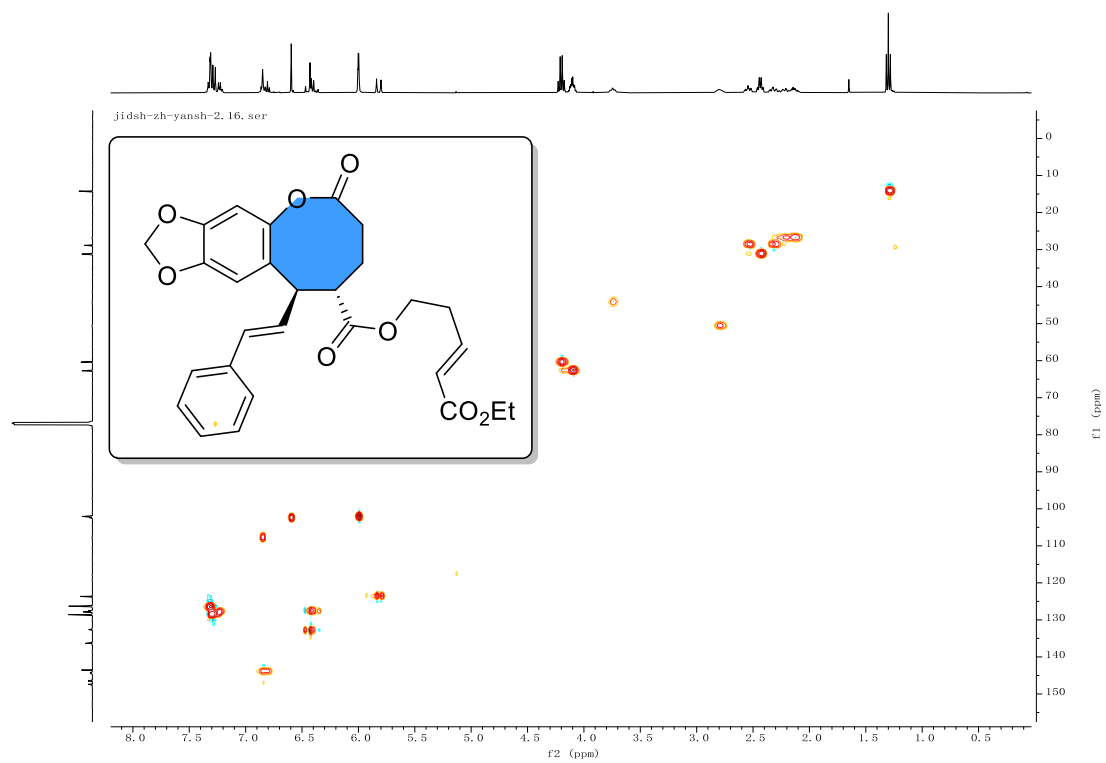

## 10 HPLC spectra of 8-membered lactone

### HPLC of racemic **3aa**

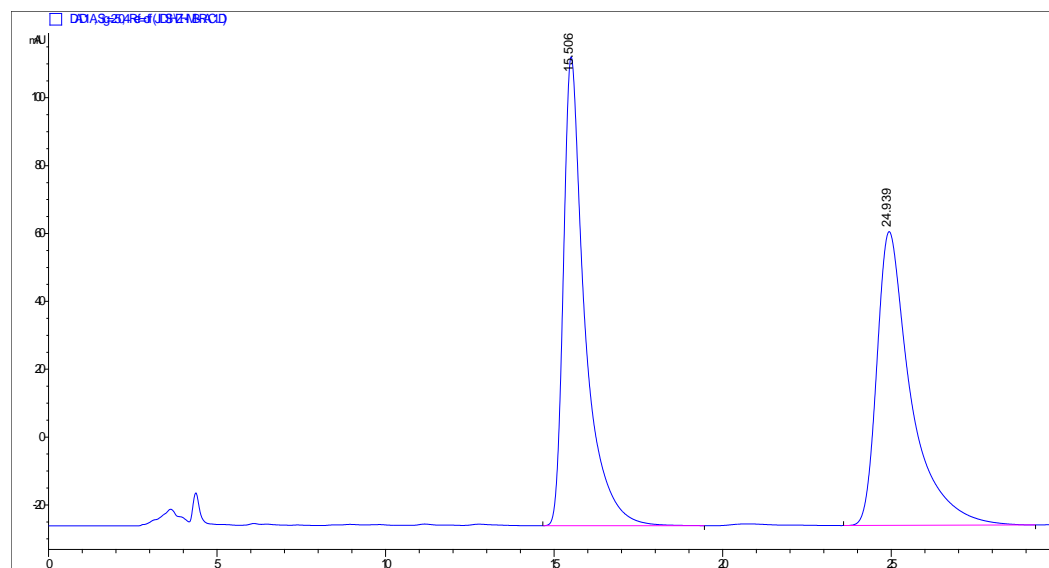

| Peak # | RetTime [min] | Type | Width [min] | Area [mAU*s] | Height [mAU] | Area %  |
|--------|---------------|------|-------------|--------------|--------------|---------|
| 1      | 15.506        | BB   | 0.6367      | 6096.41406   | 138.19295    | 50.1462 |
| 2      | 24.939        | BB   | 1.0127      | 6060.86426   | 86.57984     | 49.8538 |

### Enantioenriched **3aa**

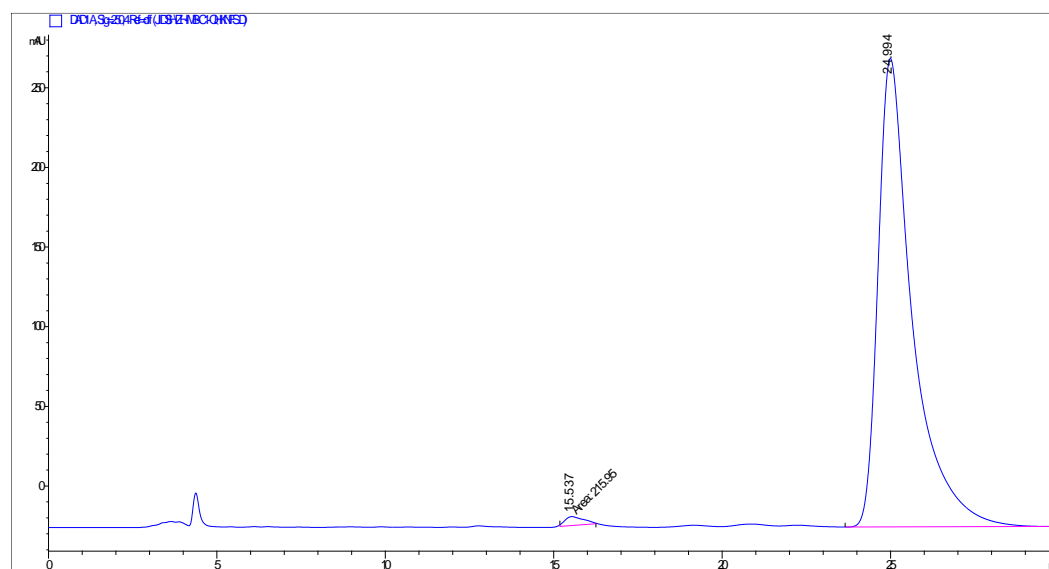

| Peak # | RetTime [min] | Type | Width [min] | Area [mAU*s] | Height [mAU] | Area %  |
|--------|---------------|------|-------------|--------------|--------------|---------|
| 1      | 15.537        | MM   | 0.6376      | 215.95013    | 5.64489      | 1.0273  |
| 2      | 24.994        | BBA  | 1.0293      | 2.08050e4    | 294.11728    | 98.9727 |



### Racemic-3ba

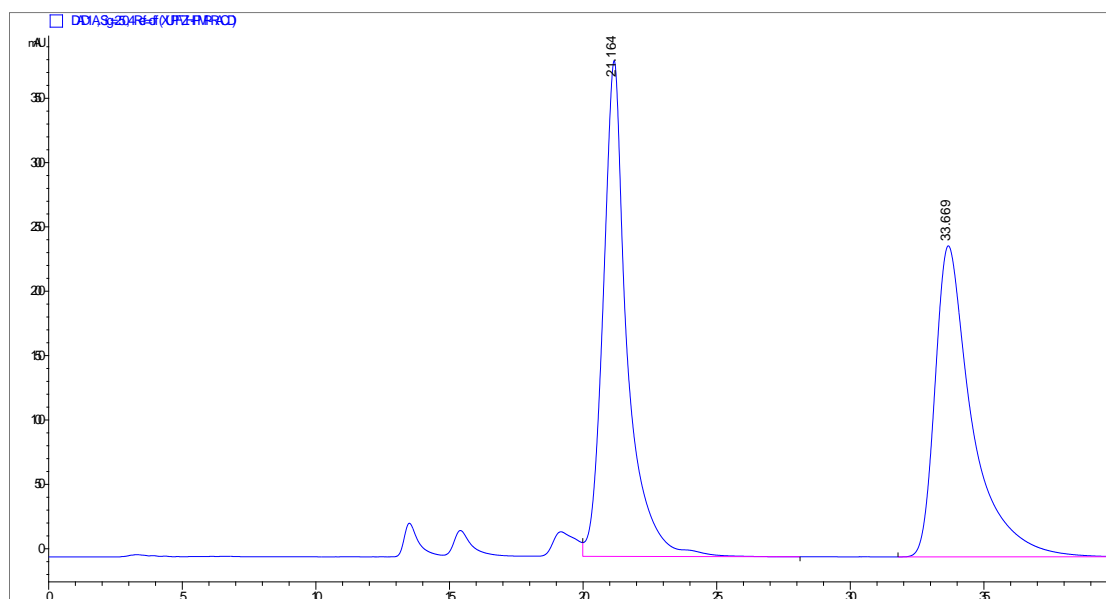

| Peak # | RetTime [min] | Type | Width [min] | Area [mAU*s] | Height [mAU] | Area %  |
|--------|---------------|------|-------------|--------------|--------------|---------|
| 1      | 21.164        | VB   | 0.8874      | 2.40141e4    | 385.18512    | 50.8534 |
| 2      | 33.669        | BBA  | 1.3905      | 2.32082e4    | 241.63474    | 49.1466 |

### Enantioenriched-3ba

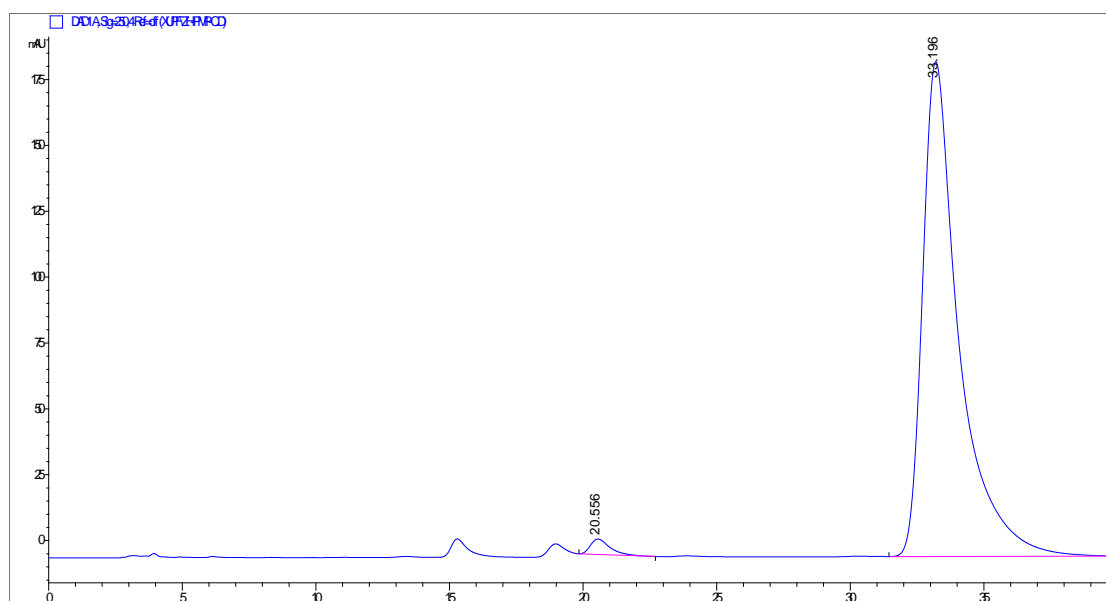

| Peak # | RetTime [min] | Type | Width [min] | Area [mAU*s] | Height [mAU] | Area %  |
|--------|---------------|------|-------------|--------------|--------------|---------|
| 1      | 20.556        | BB   | 0.7322      | 300.96606    | 5.88918      | 1.6694  |
| 2      | 33.196        | BBA  | 1.3710      | 1.77272e4    | 187.84019    | 98.3306 |

### Racemic-3ca

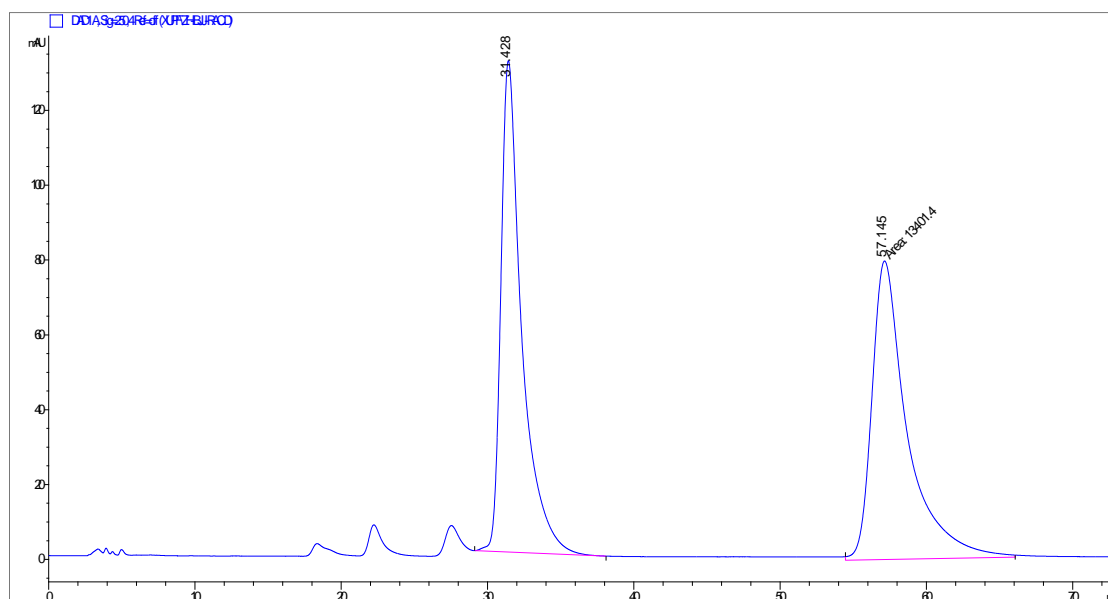

| Peak # | RetTime [min] | Type | Width [min] | Area [mAU*s] | Height [mAU] | Area %  |
|--------|---------------|------|-------------|--------------|--------------|---------|
| 1      | 31.428        | BB   | 1.4371      | 1.30235e4    | 131.31514    | 49.2849 |
| 2      | 57.145        | MM   | 2.8004      | 1.34014e4    | 79.75992     | 50.7151 |

### Enantioenriched-3ca

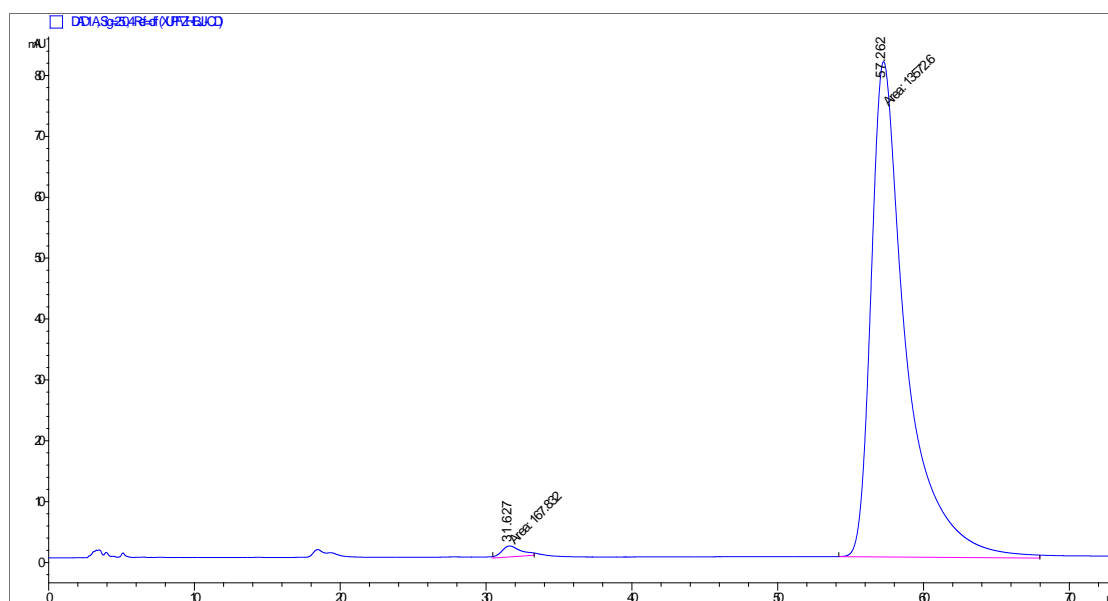

| Peak # | RetTime [min] | Type | Width [min] | Area [mAU*s] | Height [mAU] | Area %  |
|--------|---------------|------|-------------|--------------|--------------|---------|
| 1      | 31.627        | MM   | 1.5446      | 167.83243    | 1.81096      | 1.2215  |
| 2      | 57.262        | MM   | 2.7796      | 1.35726e4    | 81.38148     | 98.7785 |

### Racemic-3da

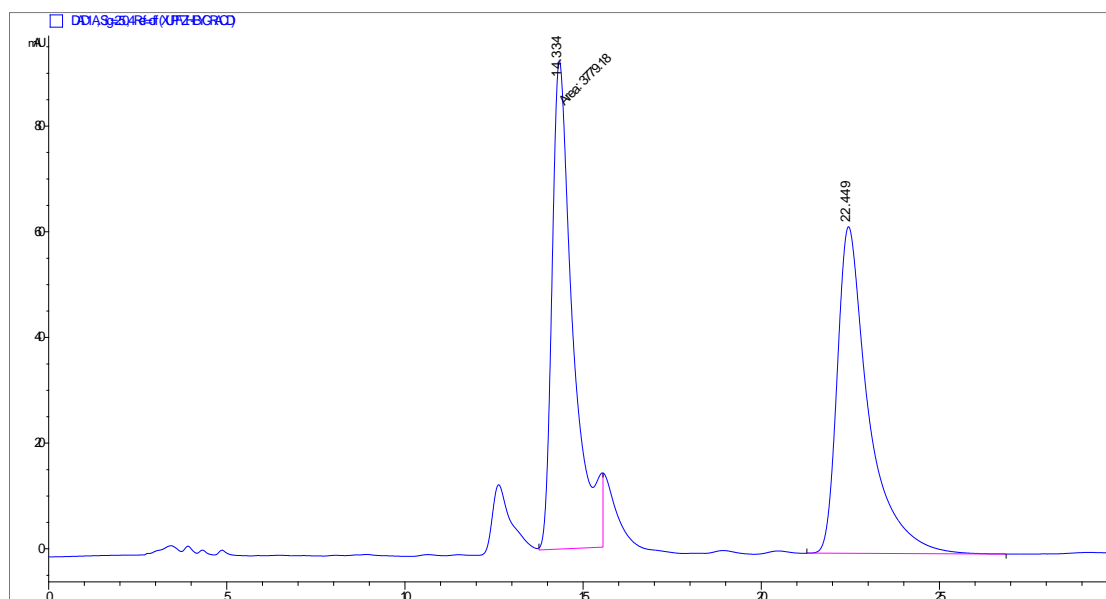

| Peak # | RetTime [min] | Type | Width [min] | Area [mAU*s] | Height [mAU] | Area %  |
|--------|---------------|------|-------------|--------------|--------------|---------|
| 1      | 14.334        | MM   | 0.6814      | 3779.18481   | 92.43330     | 50.1083 |
| 2      | 22.449        | BB   | 0.8843      | 3762.84399   | 61.80508     | 49.8917 |

### Enantioenriched-3da

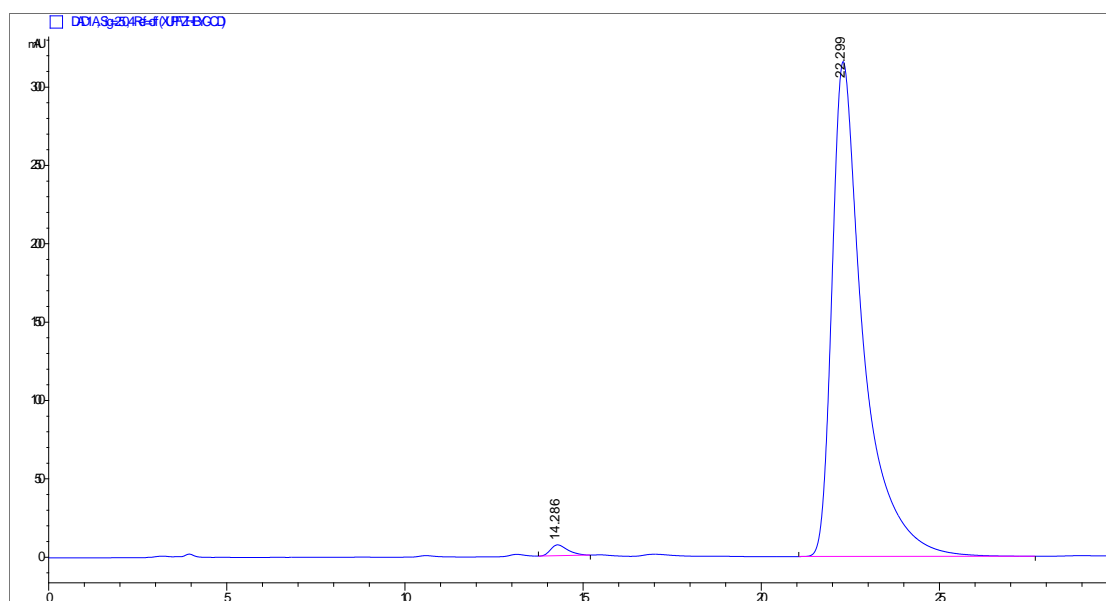

| Peak # | RetTime [min] | Type | Width [min] | Area [mAU*s] | Height [mAU] | Area %  |
|--------|---------------|------|-------------|--------------|--------------|---------|
| 1      | 14.286        | BB   | 0.4976      | 233.31847    | 6.95168      | 1.1928  |
| 2      | 22.299        | BB   | 0.8900      | 1.93266e4    | 315.80740    | 98.8072 |

### Racemic-3ea

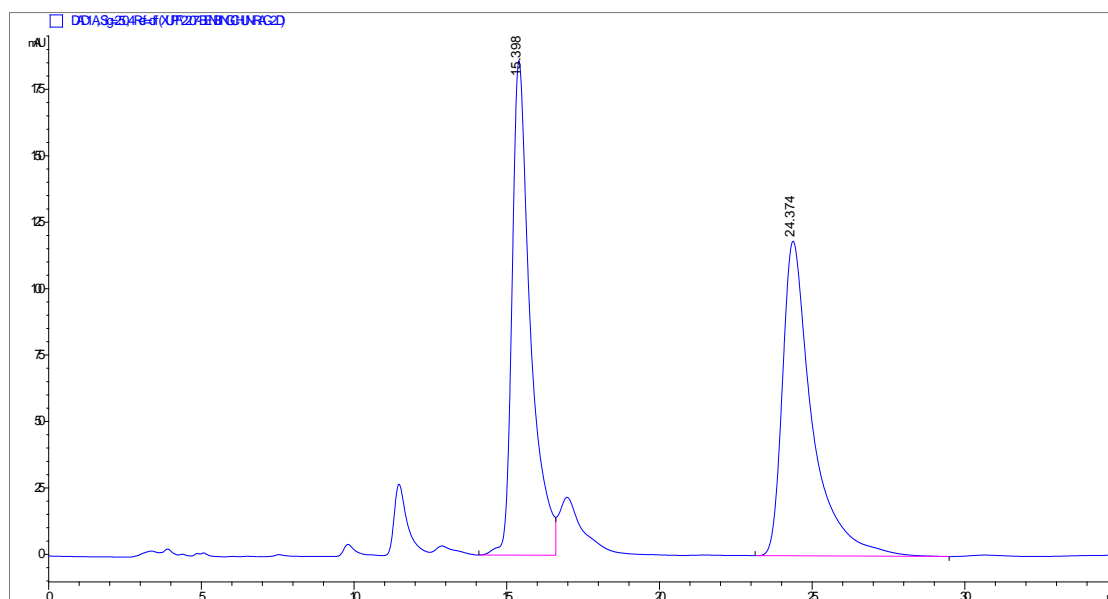

| Peak # | RetTime [min] | Type | Width [min] | Area [mAU*s] | Height [mAU] | Area %  |
|--------|---------------|------|-------------|--------------|--------------|---------|
| 1      | 15.398        | BV   | 0.6126      | 7826.03809   | 186.10379    | 49.4886 |
| 2      | 24.374        | BB   | 0.9813      | 7987.78516   | 118.37040    | 50.5114 |

### Enantioenriched-3ea

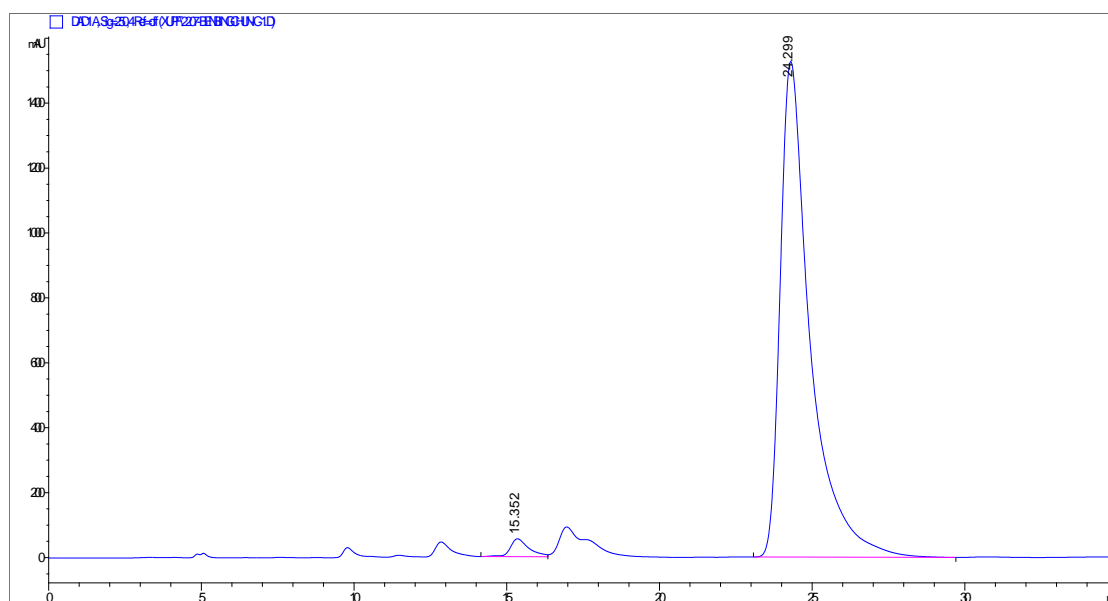

| Peak # | RetTime [min] | Type | Width [min] | Area [mAU*s] | Height [mAU] | Area %  |
|--------|---------------|------|-------------|--------------|--------------|---------|
| 1      | 15.352        | BV   | 0.6177      | 2344.76245   | 55.18307     | 2.1969  |
| 2      | 24.299        | BB   | 0.9997      | 1.04384e5    | 1526.68005   | 97.8031 |

### Racemic-3fa

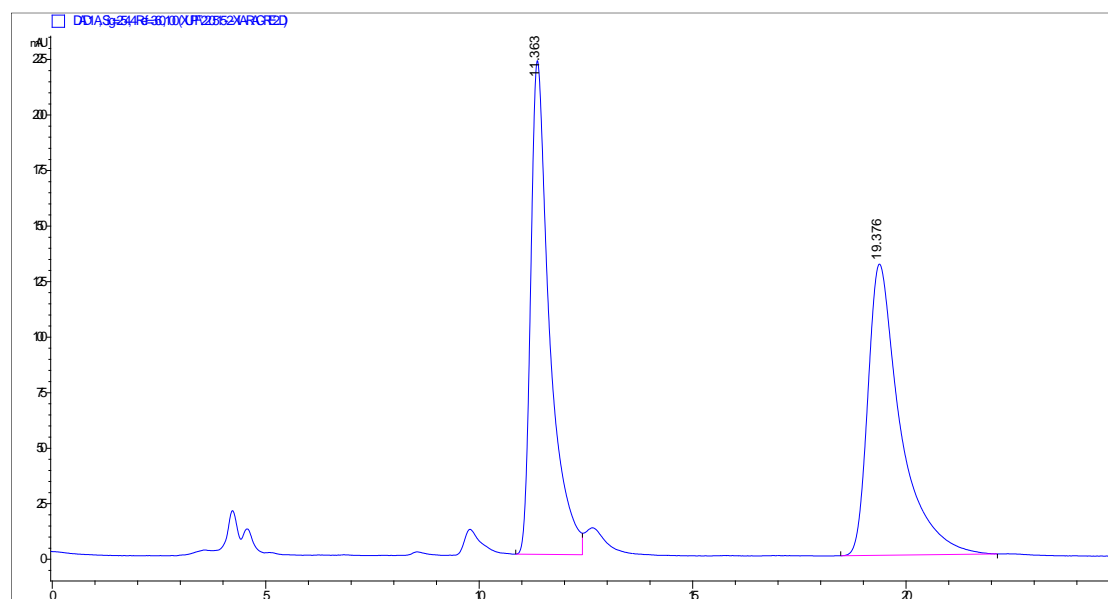

| Peak # | RetTime [min] | Type | Width [min] | Area [mAU*s] | Height [mAU] | Area %  |
|--------|---------------|------|-------------|--------------|--------------|---------|
| 1      | 11.363        | BV   | 0.4468      | 6834.97168   | 222.25769    | 49.7673 |
| 2      | 19.376        | BB   | 0.7518      | 6898.89746   | 131.12804    | 50.2327 |

### Enantioenriched-3fa

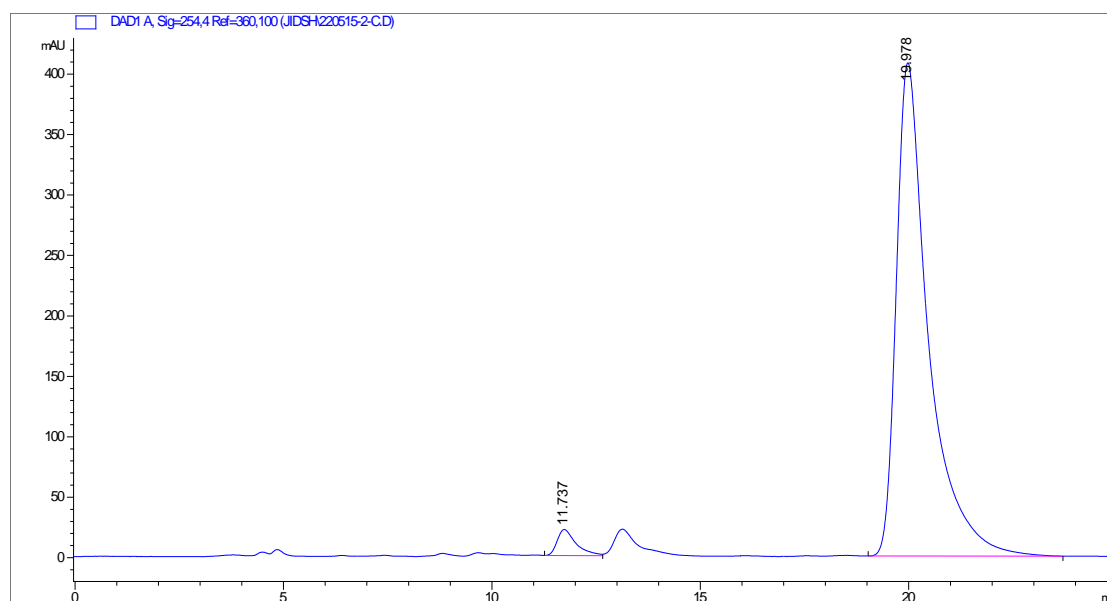

| Peak # | RetTime [min] | Type | Width [min] | Area [mAU*s] | Height [mAU] | Area %  |
|--------|---------------|------|-------------|--------------|--------------|---------|
| 1      | 11.737        | BV   | 0.4544      | 679.67218    | 21.52134     | 3.0096  |
| 2      | 19.978        | BB   | 0.7842      | 2.19036e4    | 408.09927    | 96.9904 |

### Racemic-3ga

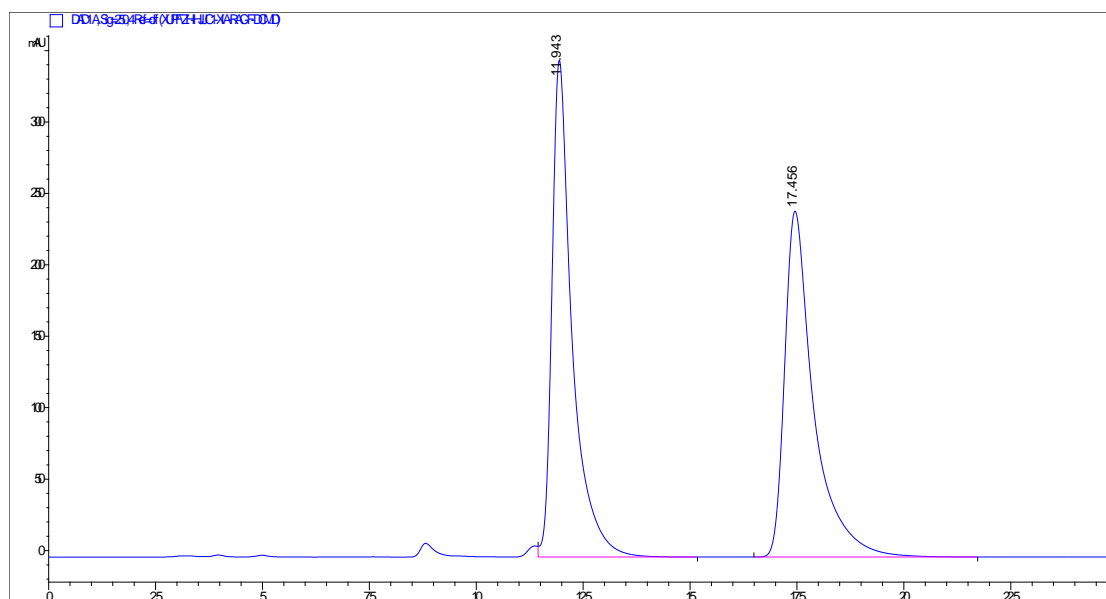

| Peak # | RetTime [min] | Type | Width [min] | Area [mAU*s] | Height [mAU] | Area %  |
|--------|---------------|------|-------------|--------------|--------------|---------|
| 1      | 11.943        | VB   | 0.4780      | 1.14427e4    | 347.63327    | 50.0213 |
| 2      | 17.456        | BB   | 0.6870      | 1.14330e4    | 242.07831    | 49.9787 |

### Enantiomeriched-3ga

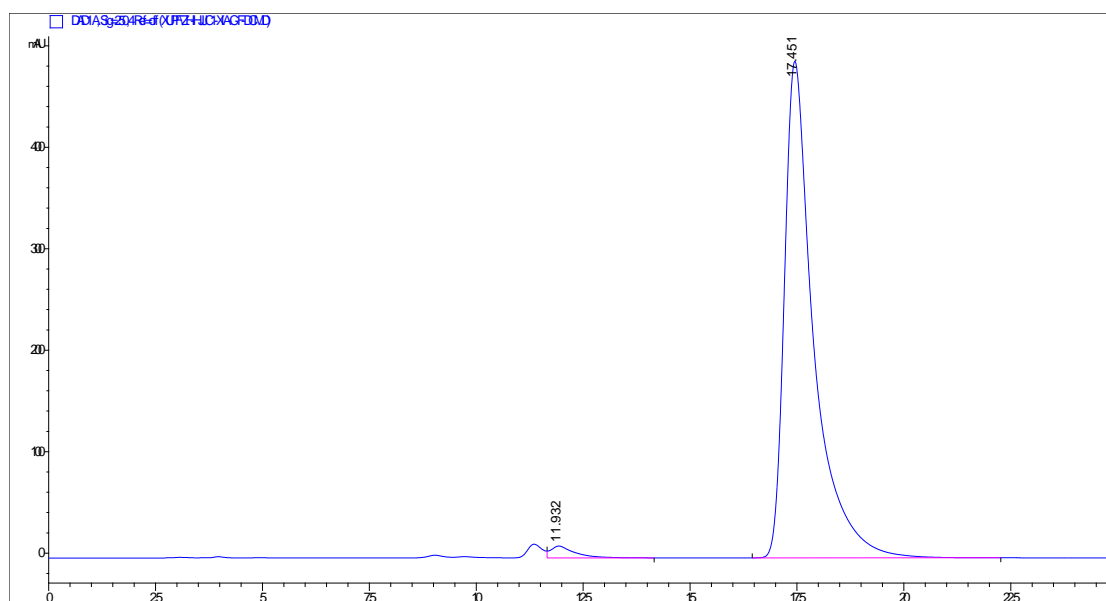

| Peak # | RetTime [min] | Type | Width [min] | Area [mAU*s] | Height [mAU] | Area %  |
|--------|---------------|------|-------------|--------------|--------------|---------|
| 1      | 11.932        | VB   | 0.5364      | 450.20132    | 11.61038     | 1.8983  |
| 2      | 17.451        | BB   | 0.6928      | 2.32663e4    | 489.27783    | 98.1017 |

### Racemic-3ha

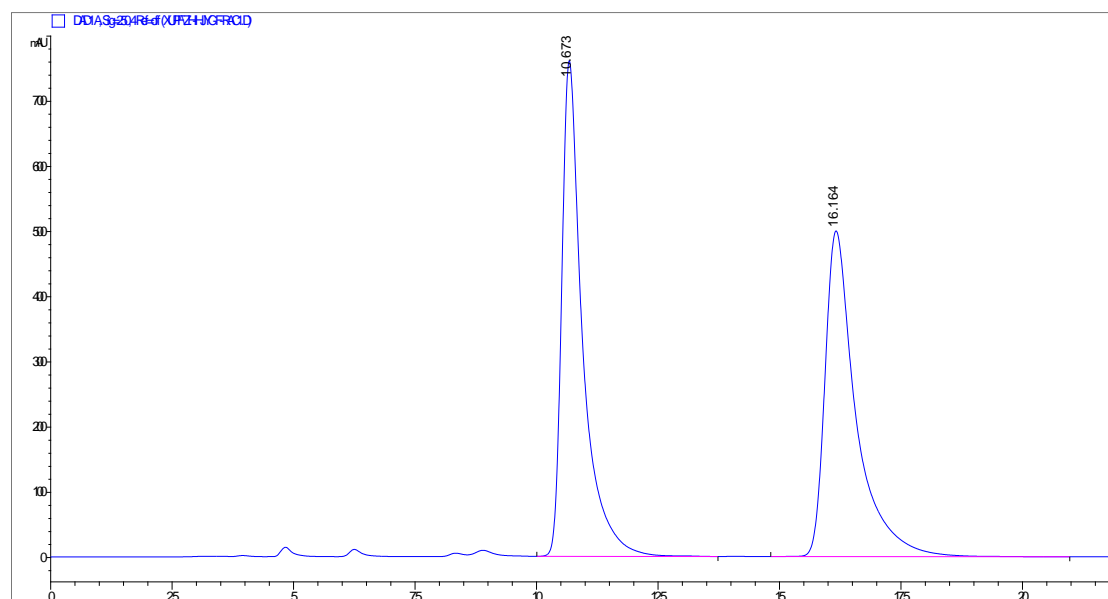

| Peak # | RetTime [min] | Type | Width [min] | Area [mAU*s] | Height [mAU] | Area %  |
|--------|---------------|------|-------------|--------------|--------------|---------|
| 1      | 10.673        | BB   | 0.4340      | 2.26801e4    | 760.41919    | 50.6060 |
| 2      | 16.164        | BB   | 0.6449      | 2.21369e4    | 499.64114    | 49.3940 |

### Enantioenriched-3ha

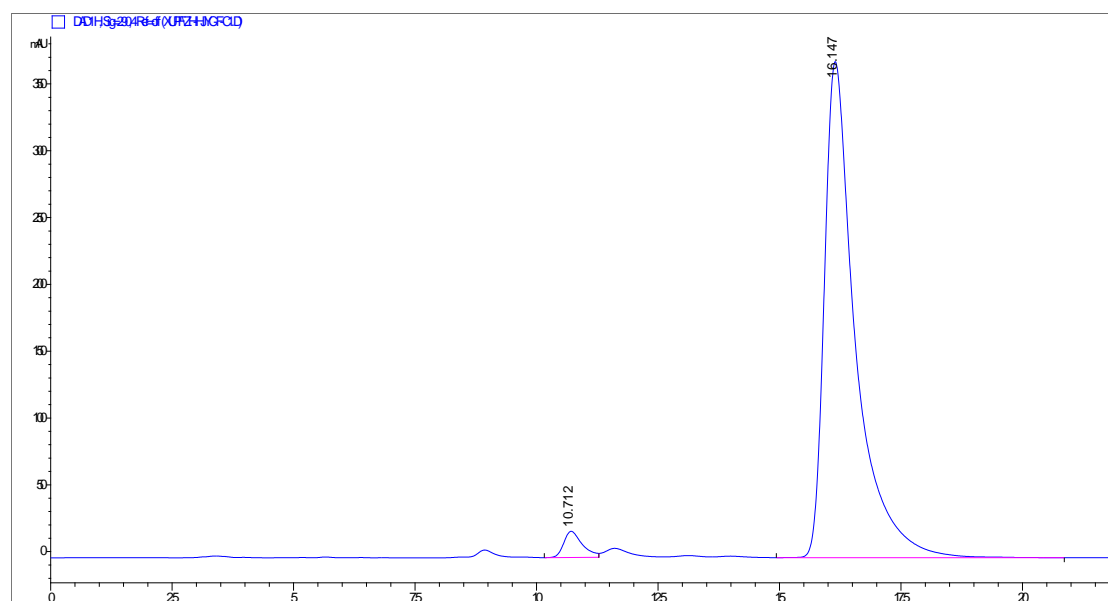

| Peak # | RetTime [min] | Type | Width [min] | Area [mAU*s] | Height [mAU] | Area %  |
|--------|---------------|------|-------------|--------------|--------------|---------|
| 1      | 10.713        | MF   | 0.3411      | 1346.02661   | 65.76846     | 2.4872  |
| 2      | 16.147        | BB   | 0.6488      | 5.27727e4    | 1186.75610   | 97.5128 |

### Racemic-3ia

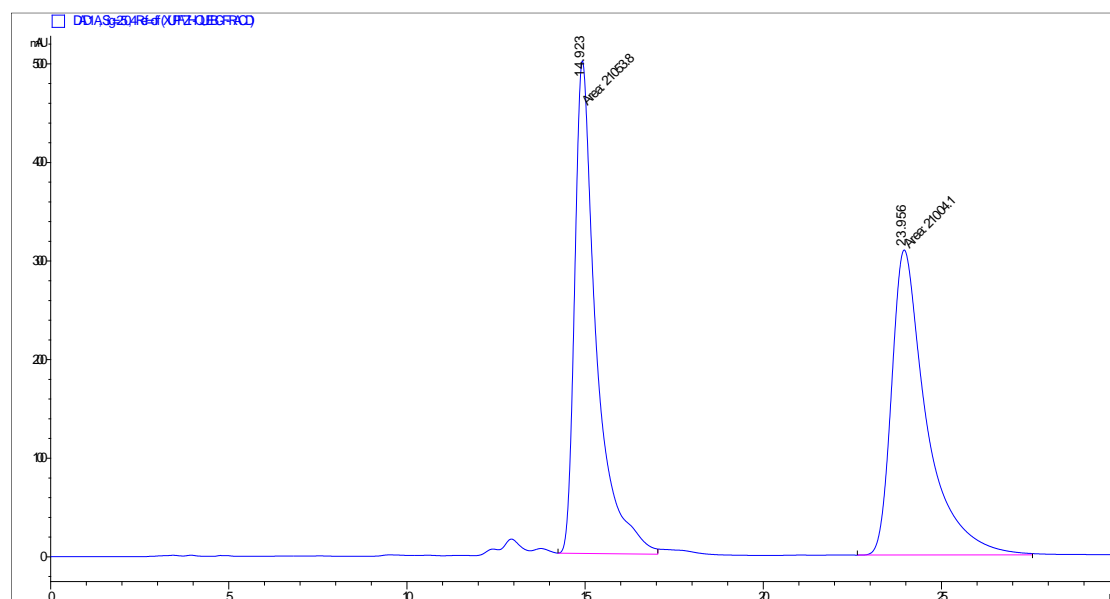

| Peak # | RetTime [min] | Type | Width [min] | Area [mAU*s] | Height [mAU] | Area %  |
|--------|---------------|------|-------------|--------------|--------------|---------|
| 1      | 14.923        | MF   | 0.7022      | 2.10538e4    | 499.68320    | 50.0591 |
| 2      | 23.956        | MF   | 1.1312      | 2.10041e4    | 309.46317    | 49.9409 |

### Enantioenriched-3ia

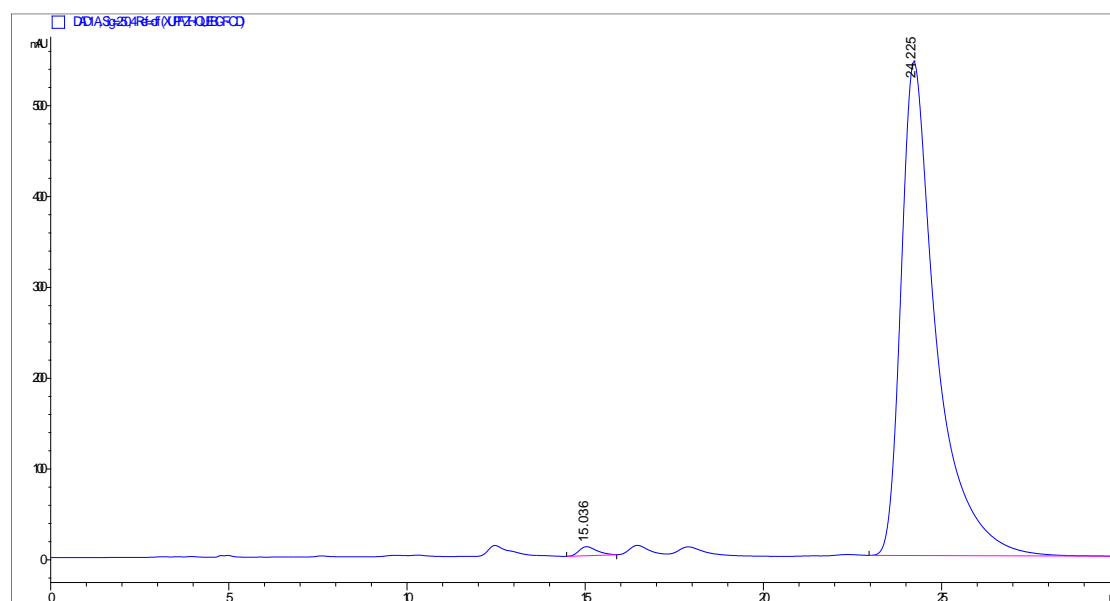

| Peak # | RetTime [min] | Type | Width [min] | Area [mAU*s] | Height [mAU] | Area %  |
|--------|---------------|------|-------------|--------------|--------------|---------|
| 1      | 15.036        | BB   | 0.5155      | 342.63486    | 9.90702      | 0.9086  |
| 2      | 24.225        | BBA  | 0.9999      | 3.73674e4    | 543.64166    | 99.0914 |



## Racemic-3ja

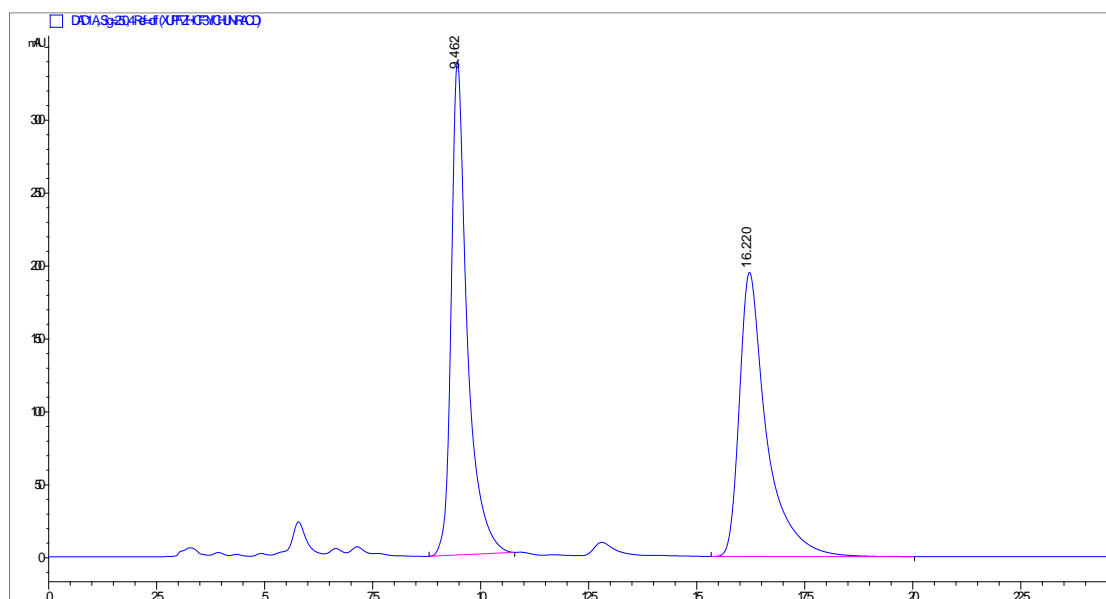

| Peak # | RetTime [min] | Type | Width [min] | Area [mAU*s] | Height [mAU] | Area %  |
|--------|---------------|------|-------------|--------------|--------------|---------|
| 1      | 9.462         | BB   | 0.3772      | 8746.53711   | 338.81989    | 50.7732 |
| 2      | 16.220        | BB   | 0.6342      | 8480.15039   | 194.69583    | 49.2268 |

## Enantioenriched-3ja

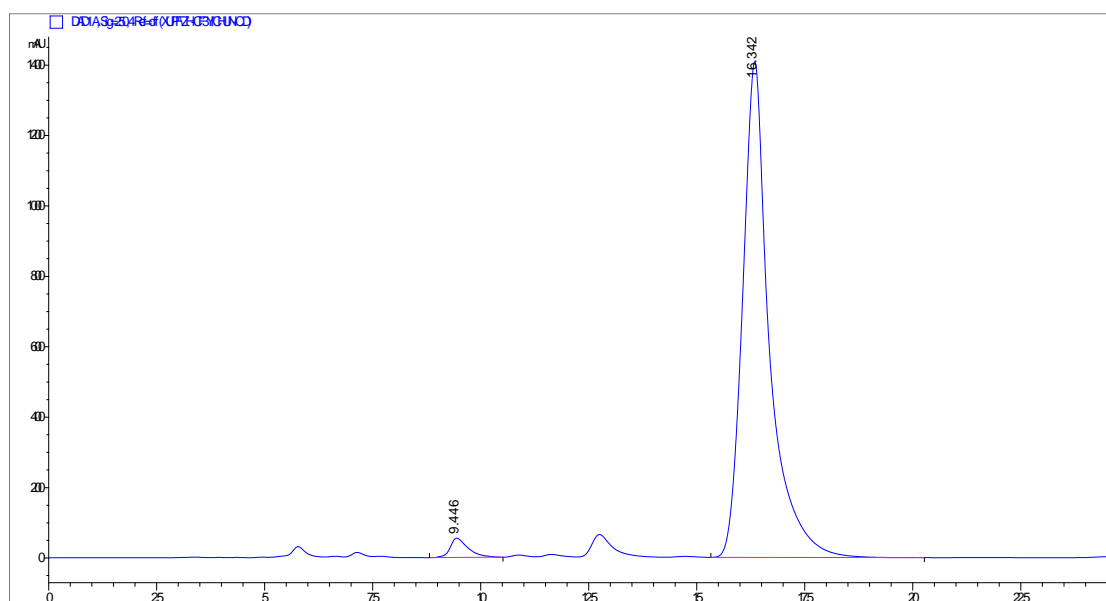

| Peak # | RetTime [min] | Type | Width [min] | Area [mAU*s] | Height [mAU] | Area %  |
|--------|---------------|------|-------------|--------------|--------------|---------|
| 1      | 9.446         | BB   | 0.4156      | 1582.29810   | 55.00337     | 2.5424  |
| 2      | 16.342        | BB   | 0.6206      | 6.06553e4    | 1407.95898   | 97.4576 |

### Racemic-3ka

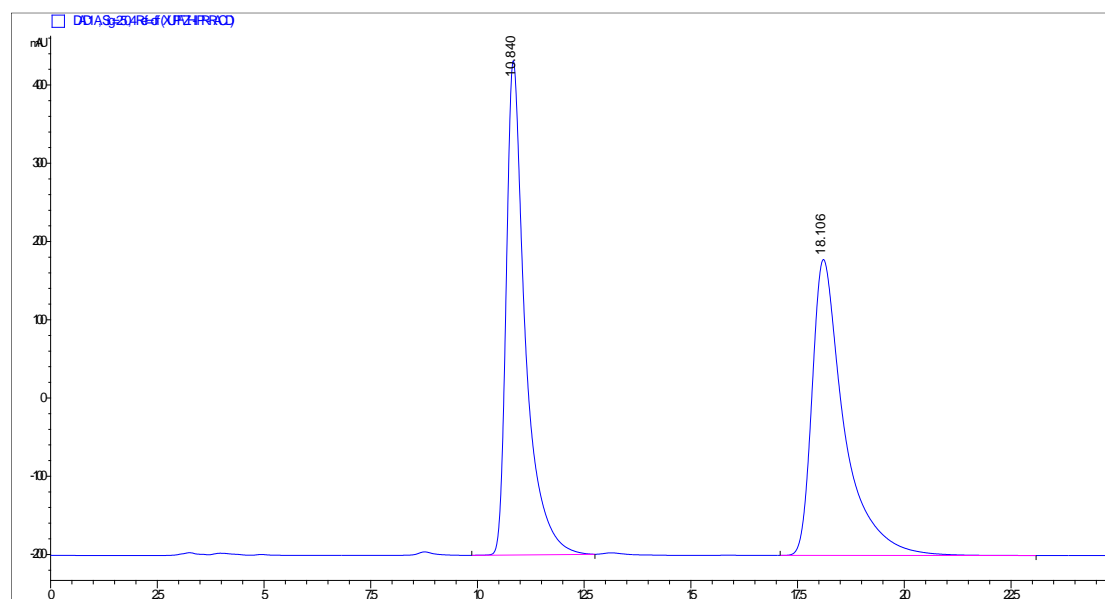

| Peak # | RetTime [min] | Type | Width [min] | Area [mAU*s] | Height [mAU] | Area %  |
|--------|---------------|------|-------------|--------------|--------------|---------|
| 1      | 10.840        | BB   | 0.4531      | 1.95498e4    | 631.63580    | 49.8342 |
| 2      | 18.106        | BB   | 0.7611      | 1.96799e4    | 378.17221    | 50.1658 |

### Enantioenriched-3ka

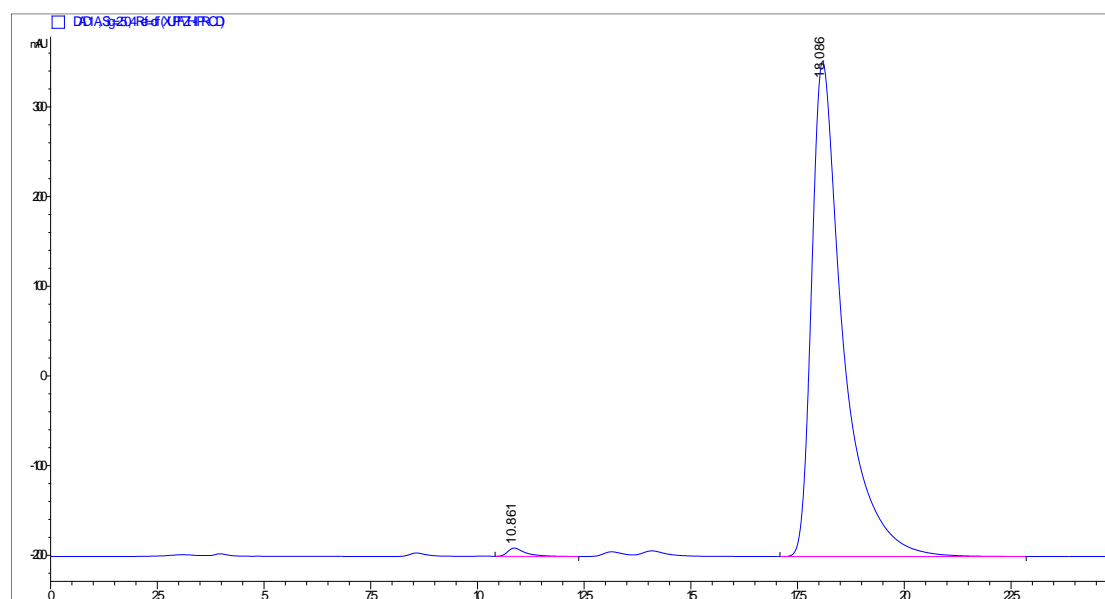

| Peak # | RetTime [min] | Type | Width [min] | Area [mAU*s] | Height [mAU] | Area %  |
|--------|---------------|------|-------------|--------------|--------------|---------|
| 1      | 10.861        | BB   | 0.4239      | 268.56650    | 9.21731      | 0.9412  |
| 2      | 18.086        | BB   | 0.7476      | 2.82671e4    | 551.82098    | 99.0588 |

### Racemic-3la

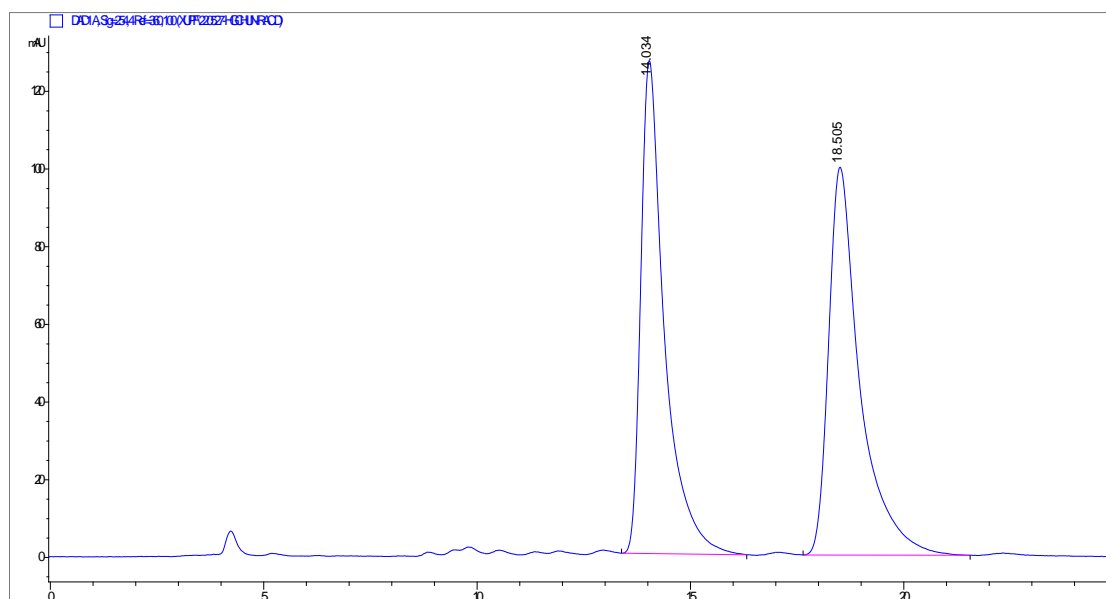

| Peak # | RetTime [min] | Type | Width [min] | Area [mAU*s] | Height [mAU] | Area %  |
|--------|---------------|------|-------------|--------------|--------------|---------|
| 1      | 14.034        | BB   | 0.5635      | 4912.62207   | 126.94267    | 49.0848 |
| 2      | 18.505        | BB   | 0.7274      | 5095.80713   | 99.84973     | 50.9152 |

### Enantioenriched-3la

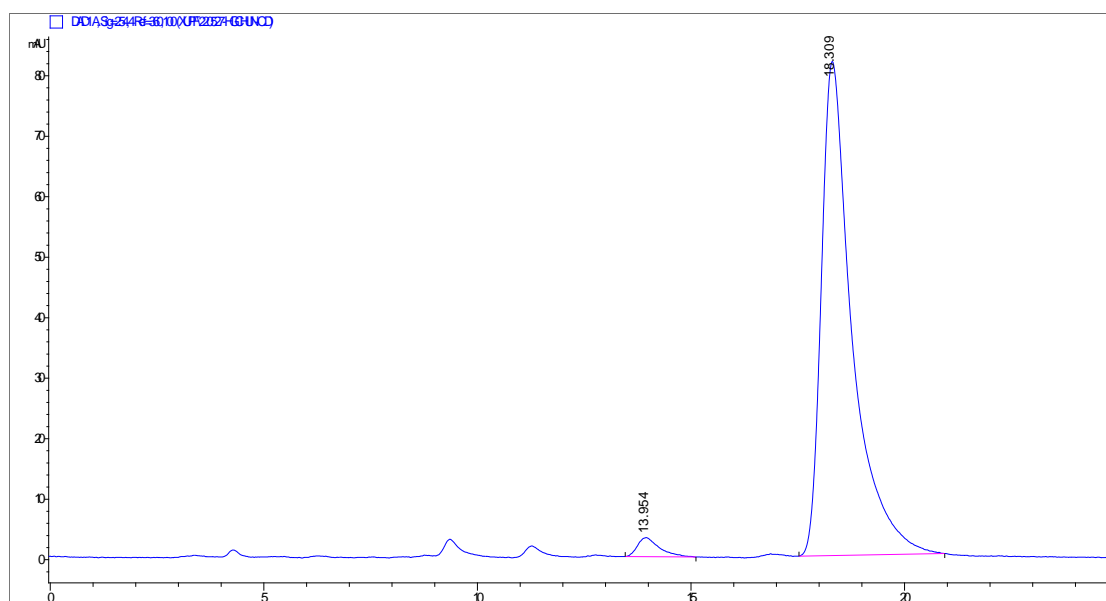

| Peak # | RetTime [min] | Type | Width [min] | Area [mAU*s] | Height [mAU] | Area %  |
|--------|---------------|------|-------------|--------------|--------------|---------|
| 1      | 13.954        | BB   | 0.4287      | 112.28943    | 3.14357      | 2.6698  |
| 2      | 18.309        | BB   | 0.7228      | 4093.69458   | 81.67459     | 97.3302 |

### Racemic-3ma

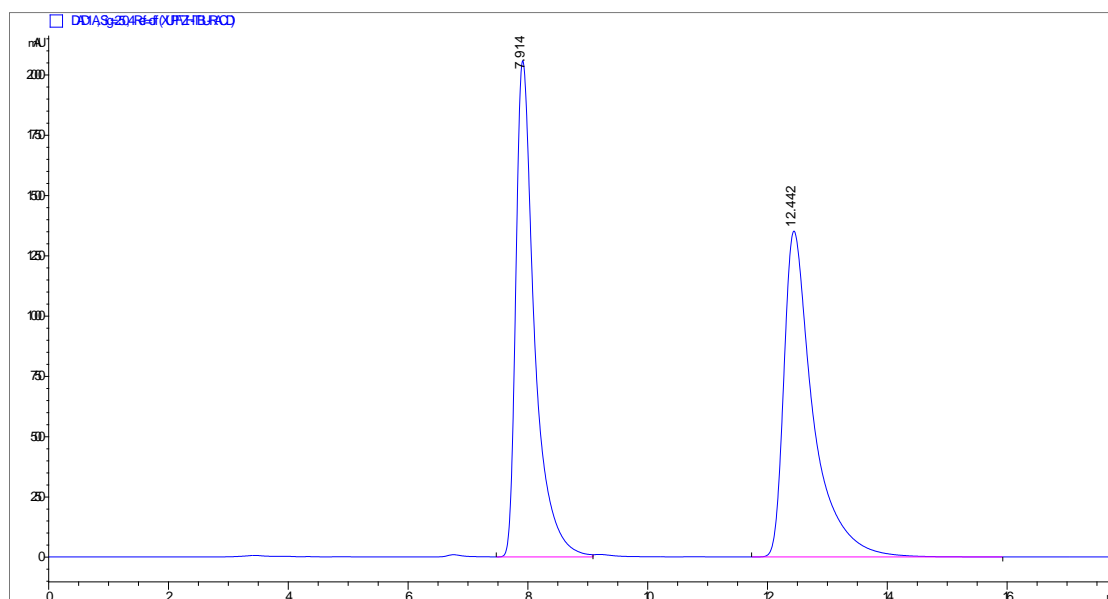

| Peak # | RetTime [min] | Type | Width [min] | Area [mAU*s] | Height [mAU] | Area %  |
|--------|---------------|------|-------------|--------------|--------------|---------|
| 1      | 7.914         | BV   | 0.3203      | 4.45172e4    | 2058.17529   | 49.3210 |
| 2      | 12.442        | BB   | 0.4949      | 4.57429e4    | 1351.42236   | 50.6790 |

### Enanrioenriched-3ma

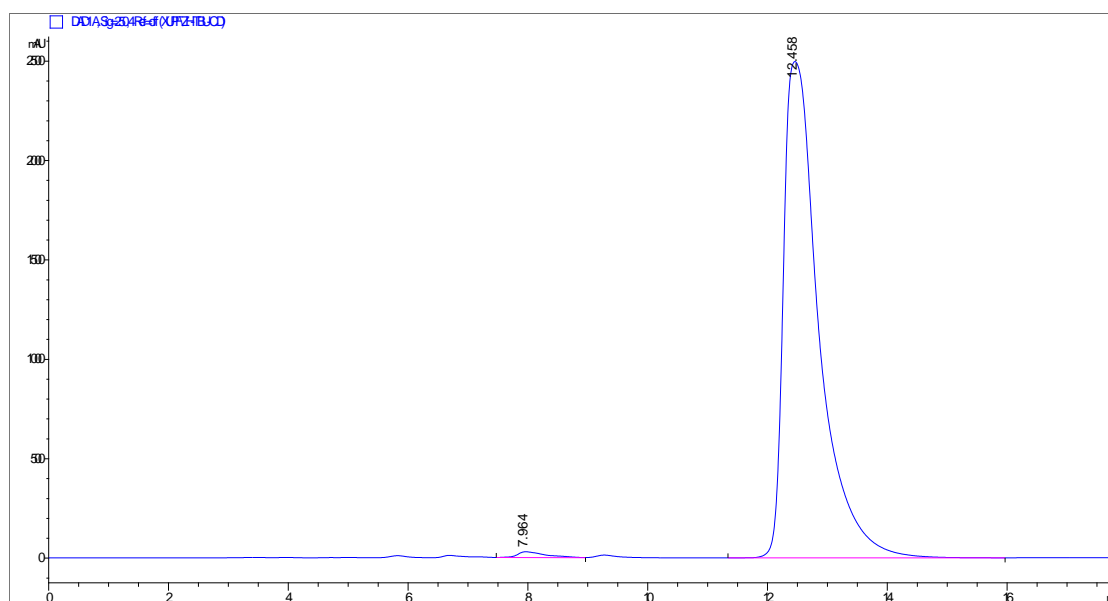

| Peak # | RetTime [min] | Type | Width [min] | Area [mAU*s] | Height [mAU] | Area %  |
|--------|---------------|------|-------------|--------------|--------------|---------|
| 1      | 7.964         | BV   | 0.4351      | 933.21216    | 29.02180     | 0.9033  |
| 2      | 12.458        | BB   | 0.6145      | 1.02382e5    | 2496.16479   | 99.0967 |

### Racemic-3na

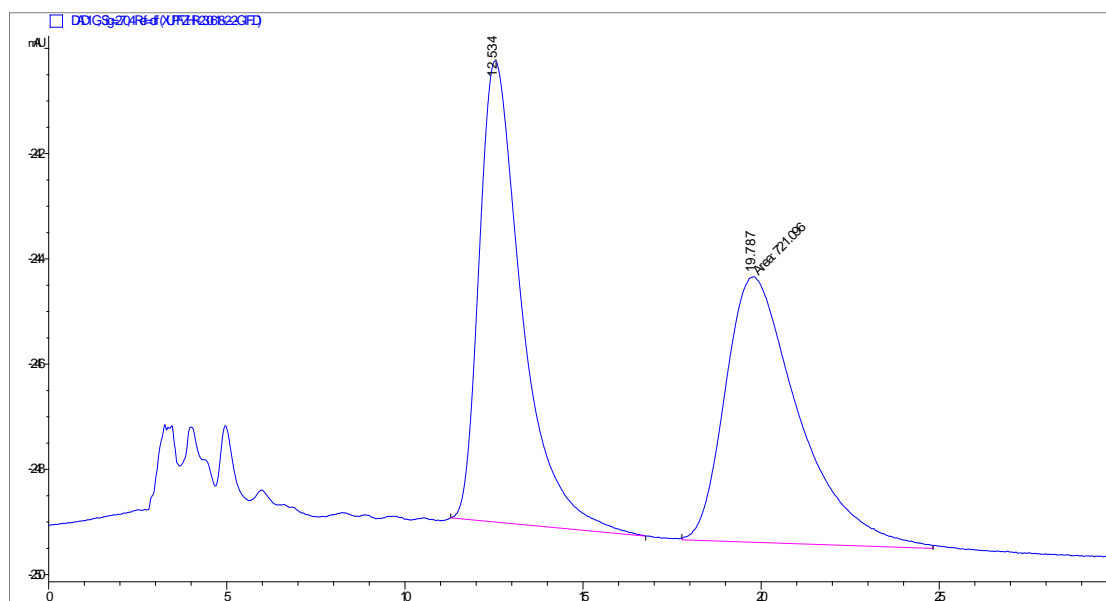

| Peak # | RetTime [min] | Type | Width [min] | Area [mAU*s] | Height [mAU] | Area %  |
|--------|---------------|------|-------------|--------------|--------------|---------|
| 1      | 12.534        | BB   | 0.9842      | 730.33984    | 8.76403      | 50.3184 |
| 2      | 19.787        | MM   | 2.3833      | 721.09589    | 5.04276      | 49.6816 |

### Enantioenriched-3na

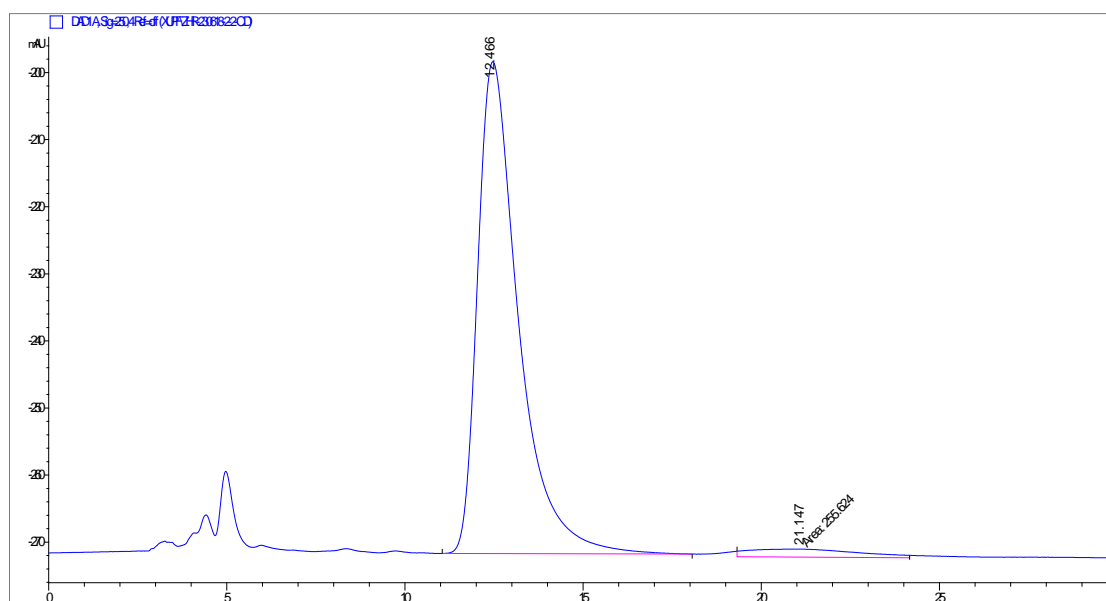

| Peak # | RetTime [min] | Type | Width [min] | Area [mAU*s] | Height [mAU] | Area %  |
|--------|---------------|------|-------------|--------------|--------------|---------|
| 1      | 12.466        | BB   | 1.1919      | 5870.66748   | 73.34243     | 95.8274 |
| 2      | 21.147        | MF   | 3.5881      | 255.62392    | 1.18737      | 4.1726  |

### Racemic-30a

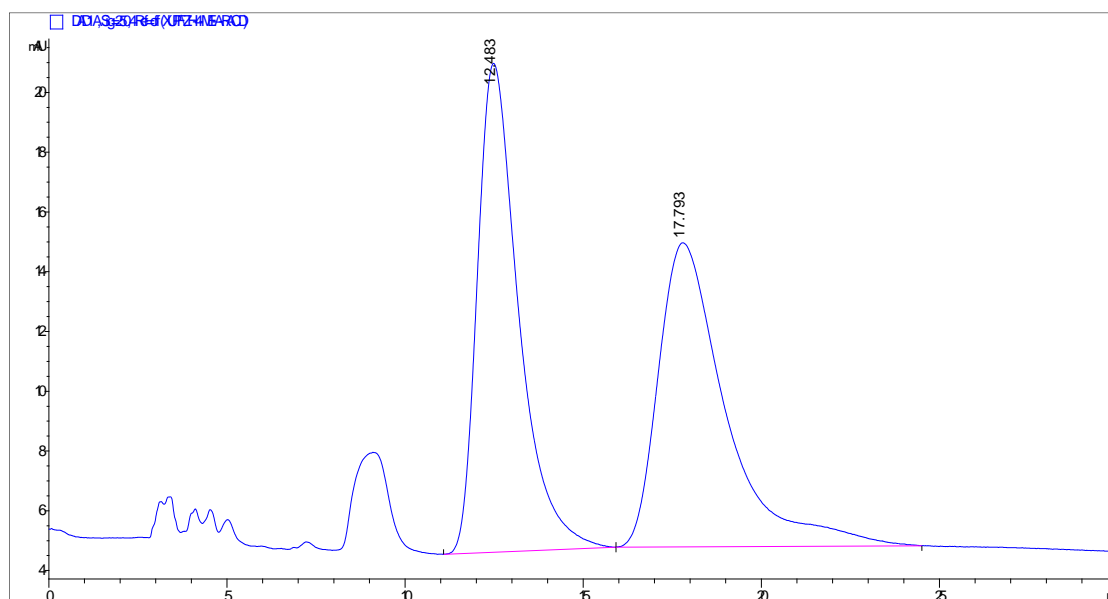

| Peak # | RetTime [min] | Type | Width [min] | Area [mAU*s] | Height [mAU] | Area %  |
|--------|---------------|------|-------------|--------------|--------------|---------|
| 1      | 12.483        | BB   | 1.1495      | 1314.98145   | 16.36365     | 49.6047 |
| 2      | 17.793        | BB   | 1.5551      | 1335.94214   | 10.17956     | 50.3953 |

### Enantioenriched-30a

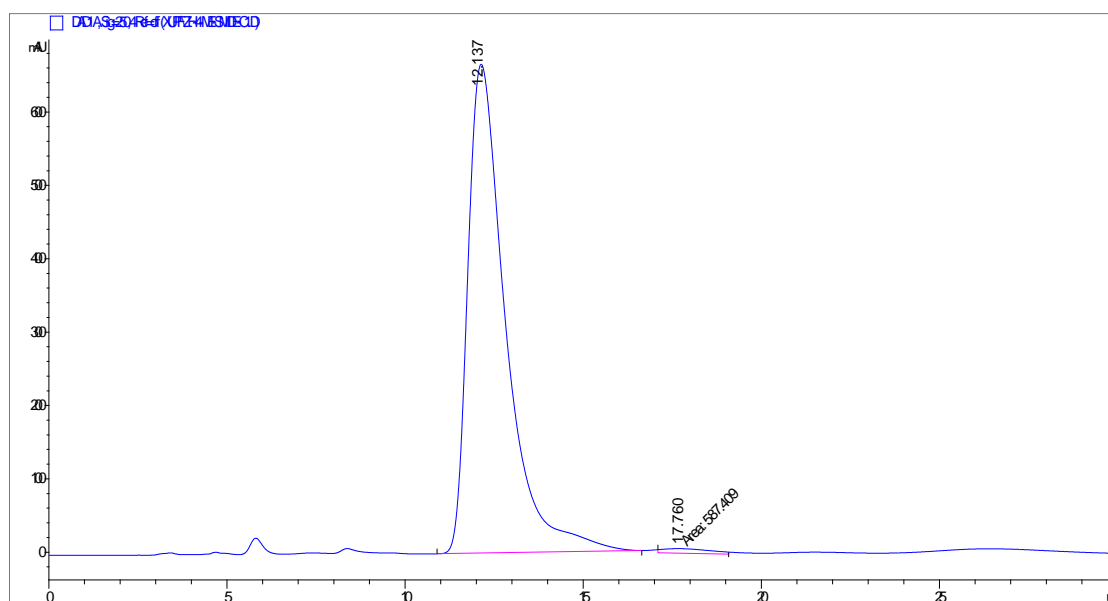

| Peak # | RetTime [min] | Type | Width [min] | Area [mAU*s] | Height [mAU] | Area %  |
|--------|---------------|------|-------------|--------------|--------------|---------|
| 1      | 12.137        | BB   | 1.1085      | 4.91484e4    | 666.35876    | 98.8189 |
| 2      | 17.760        | MM   | 1.5819      | 587.40930    | 6.18883      | 1.1811  |

### Racemic-3ab

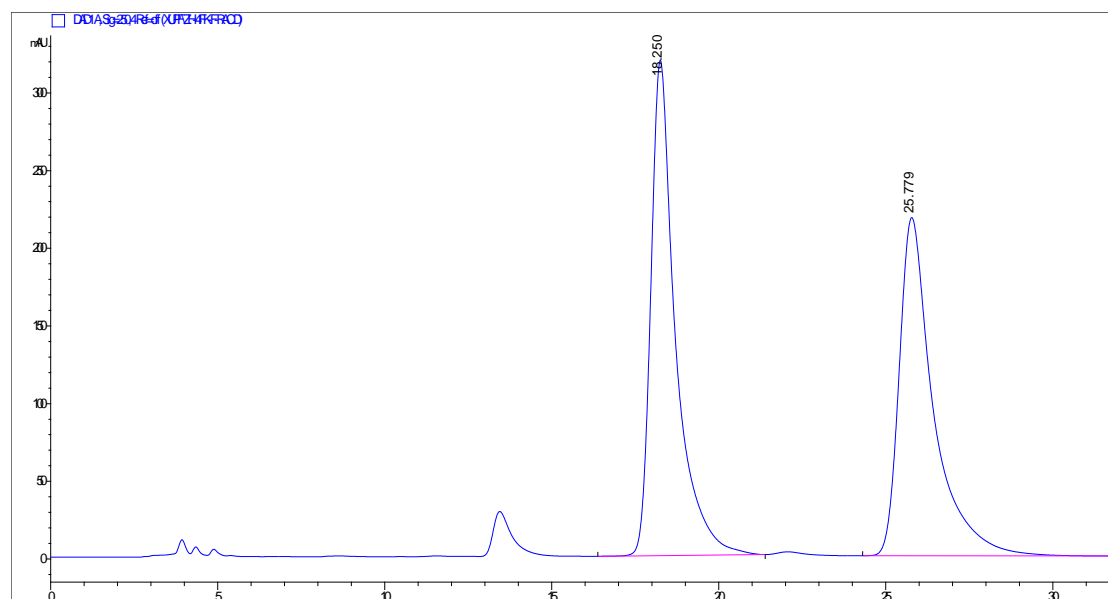

| Peak # | RetTime [min] | Type | Width [min] | Area [mAU*s] | Height [mAU] | Area %  |
|--------|---------------|------|-------------|--------------|--------------|---------|
| 1      | 18.250        | BB   | 0.7428      | 1.63649e4    | 318.82086    | 51.3964 |
| 2      | 25.779        | BB   | 1.0272      | 1.54757e4    | 217.73332    | 48.6036 |

### Enantioriched-3ab

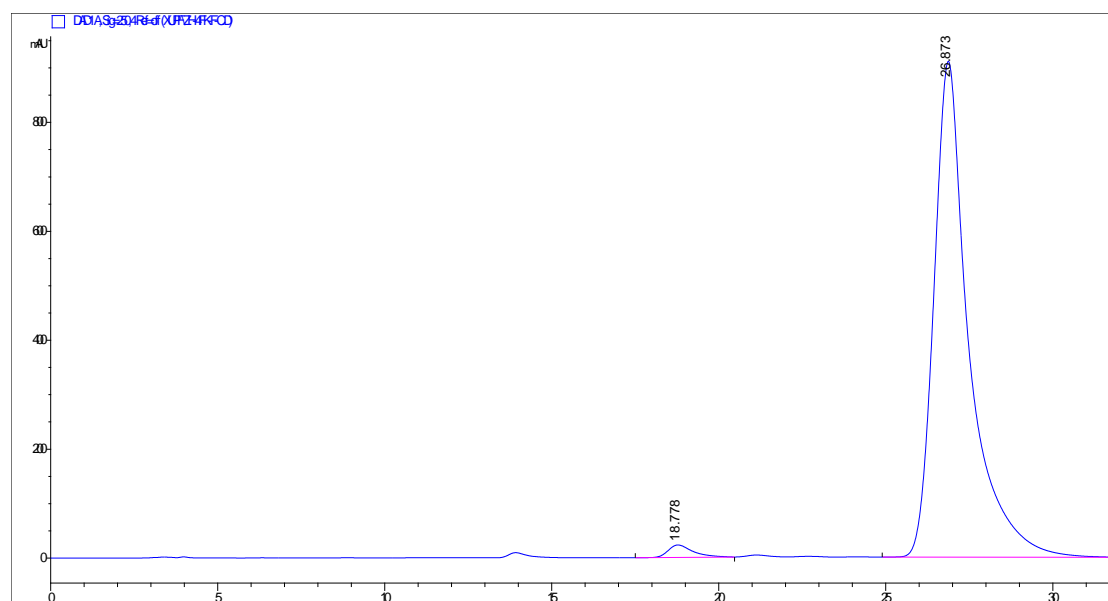

| Peak # | RetTime [min] | Type | Width [min] | Area [mAU*s] | Height [mAU] | Area %  |
|--------|---------------|------|-------------|--------------|--------------|---------|
| 1      | 18.778        | BB   | 0.7601      | 1180.94507   | 22.88120     | 1.7518  |
| 2      | 26.873        | BBA  | 1.0507      | 6.62328e4    | 910.48273    | 98.2482 |

## Racemic-3ac

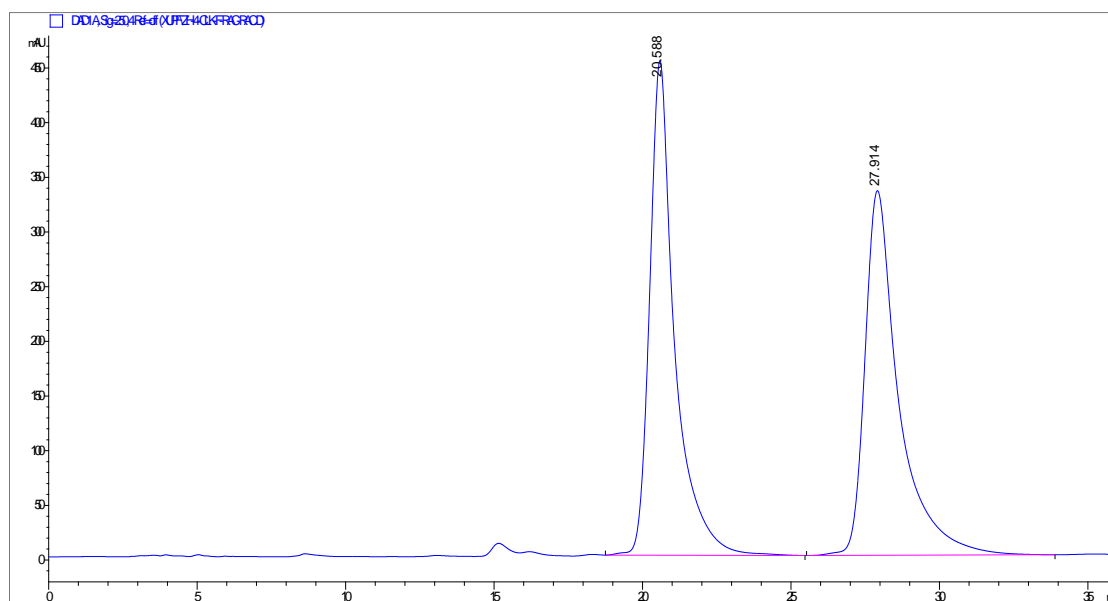

| Peak # | RetTime [min] | Type | Width [min] | Area [mAU*s] | Height [mAU] | Area %  |
|--------|---------------|------|-------------|--------------|--------------|---------|
| 1      | 20.588        | BB   | 0.8419      | 2.65136e4    | 452.30679    | 50.1559 |
| 2      | 27.914        | BB   | 1.1417      | 2.63488e4    | 333.51526    | 49.8441 |

## Enantioenriched-3ac

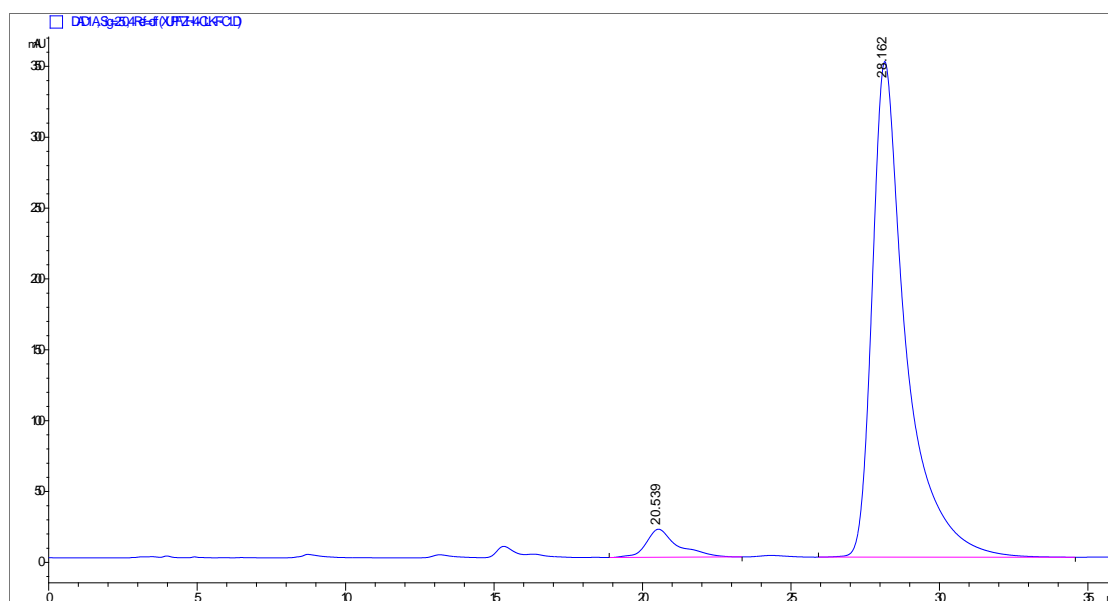

| Peak # | RetTime [min] | Type | Width [min] | Area [mAU*s] | Height [mAU] | Area %  |
|--------|---------------|------|-------------|--------------|--------------|---------|
| 1      | 20.539        | BB   | 1.0381      | 1466.12842   | 19.84029     | 5.0403  |
| 2      | 28.162        | BB   | 1.1415      | 2.76218e4    | 349.69333    | 94.9597 |



### Racemic-3ad

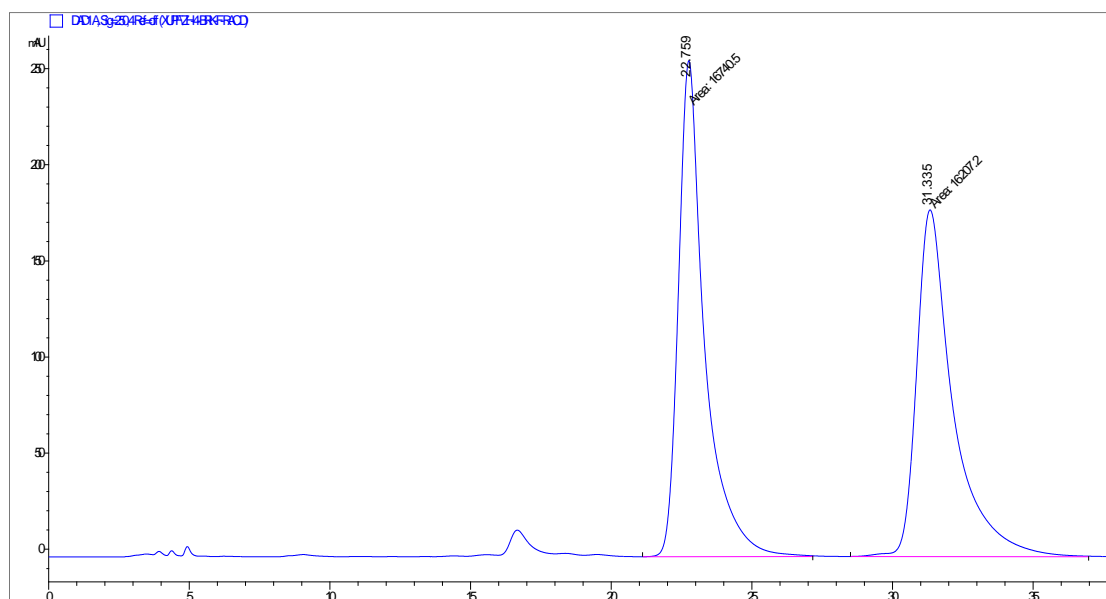

| Peak # | RetTime [min] | Type | Width [min] | Area [mAU*s] | Height [mAU] | Area %  |
|--------|---------------|------|-------------|--------------|--------------|---------|
| 1      | 22.759        | MF   | 1.0815      | 1.67405e4    | 257.97812    | 50.8092 |
| 2      | 31.335        | MF   | 1.4982      | 1.62072e4    | 180.30193    | 49.1908 |

### Enantioenriched-3ad

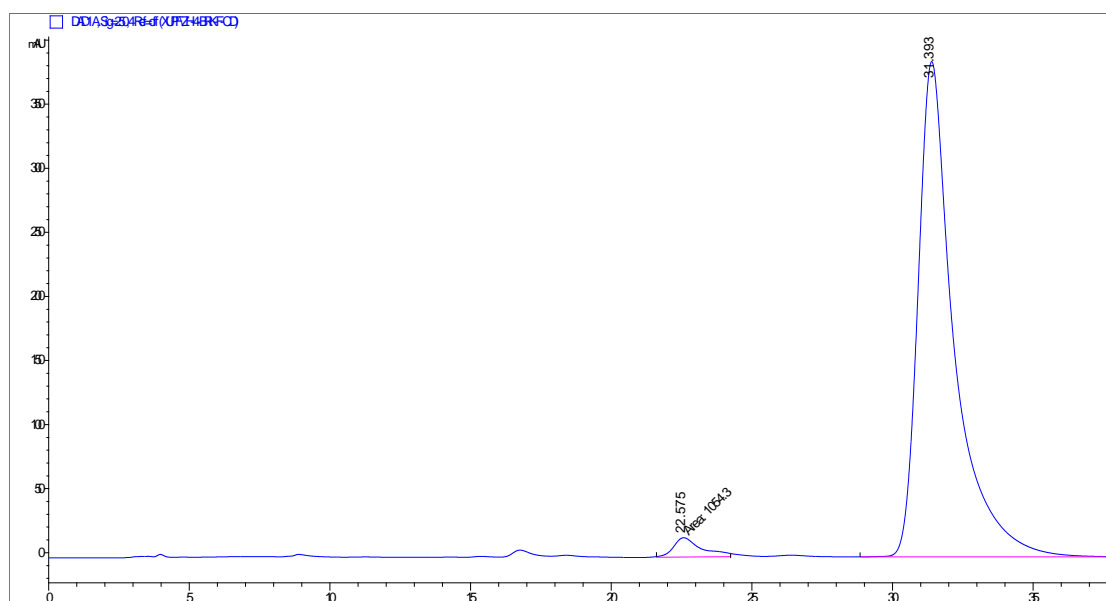

| Peak # | RetTime [min] | Type | Width [min] | Area [mAU*s] | Height [mAU] | Area %  |
|--------|---------------|------|-------------|--------------|--------------|---------|
| 1      | 22.575        | FM   | 1.1632      | 1034.30286   | 15.10623     | 2.9853  |
| 2      | 31.393        | BBA  | 1.2822      | 3.42625e4    | 386.50055    | 97.0147 |

### Racemic-3ae

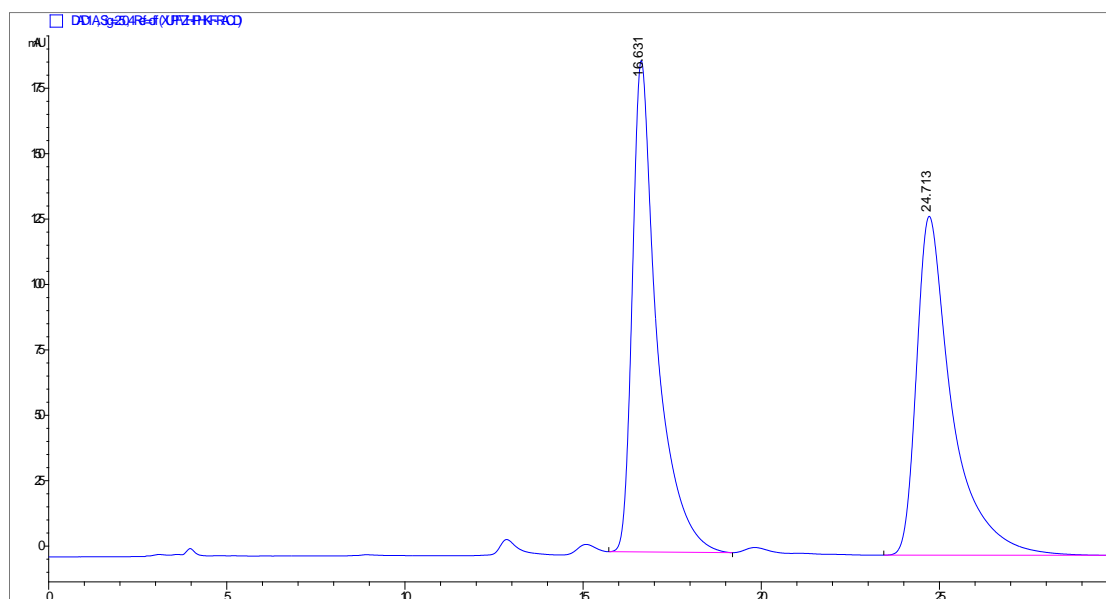

| Peak # | RetTime [min] | Type | Width [min] | Area [mAU*s] | Height [mAU] | Area %  |
|--------|---------------|------|-------------|--------------|--------------|---------|
| 1      | 16.631        | BB   | 0.6940      | 9010.86426   | 187.73538    | 50.1491 |
| 2      | 24.713        | BB   | 1.0071      | 8957.29785   | 129.47745    | 49.8509 |

### Enantioenriched-3ae

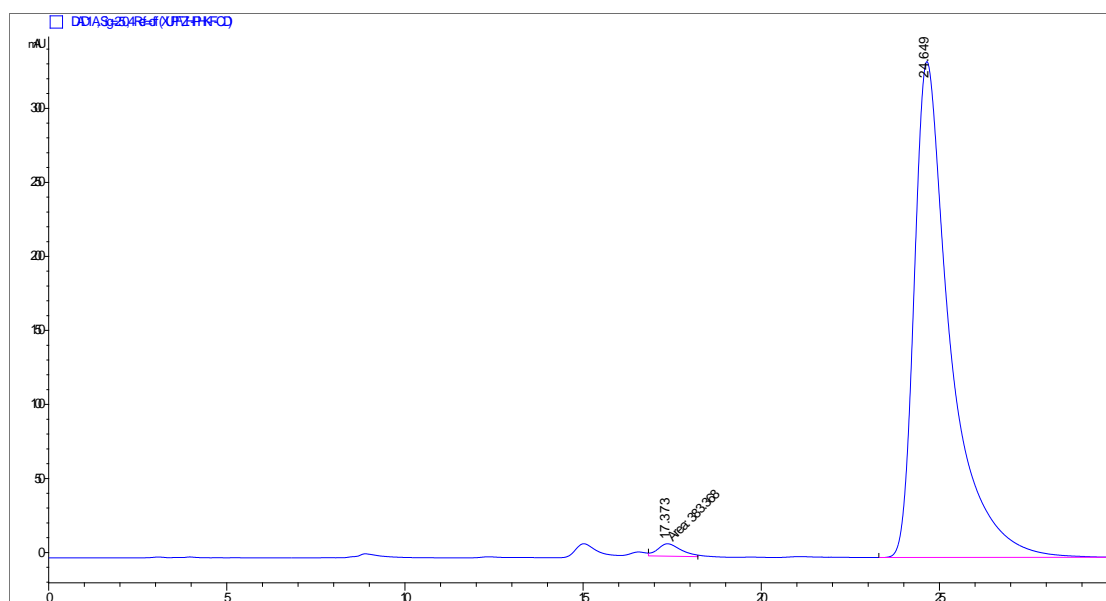

| Peak # | RetTime [min] | Type | Width [min] | Area [mAU*s] | Height [mAU] | Area %  |
|--------|---------------|------|-------------|--------------|--------------|---------|
| 1      | 17.373        | MF   | 0.7595      | 383.36829    | 8.41219      | 1.6155  |
| 2      | 24.649        | BBA  | 1.0153      | 2.33472e4    | 334.91013    | 98.3845 |

### Racemic-3af

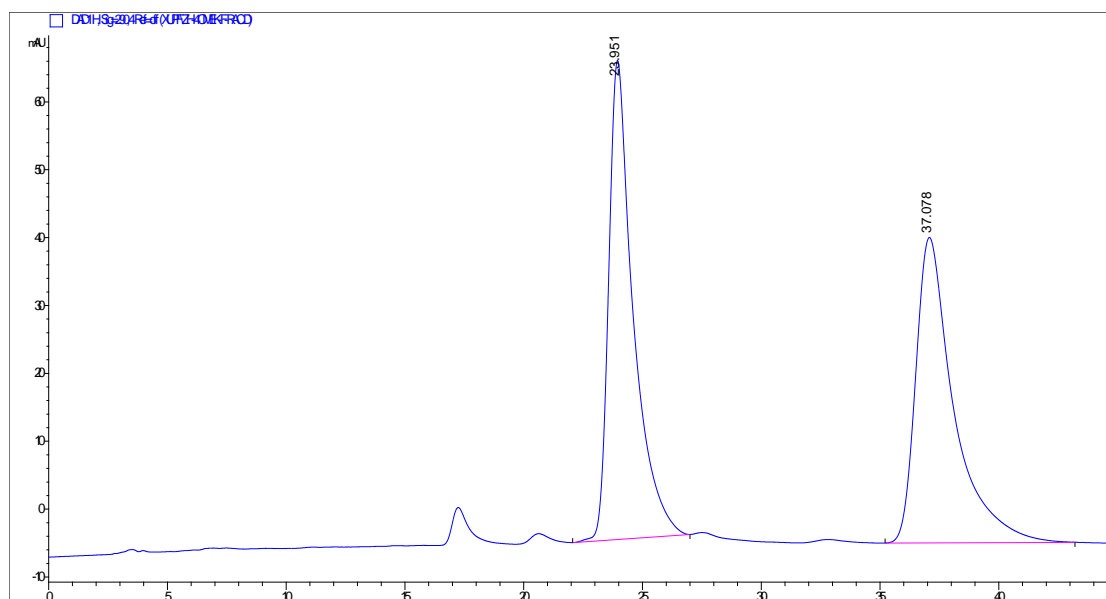

| Peak # | RetTime [min] | Type | Width [min] | Area [mAU*s] | Height [mAU] | Area %  |
|--------|---------------|------|-------------|--------------|--------------|---------|
| 1      | 23.950        | BB   | 1.0330      | 6134.52441   | 84.90253     | 50.4368 |
| 2      | 37.077        | BB   | 1.5654      | 6028.26904   | 54.29262     | 49.5632 |

### Enantioenriched-3af

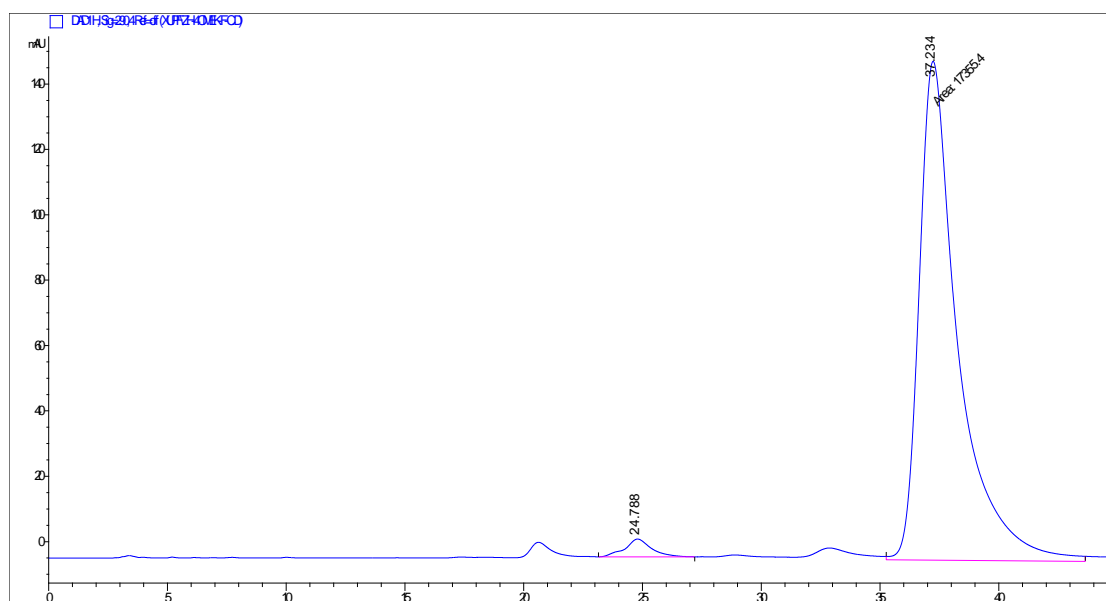

| Peak # | RetTime [min] | Type | Width [min] | Area [mAU*s] | Height [mAU] | Area %  |
|--------|---------------|------|-------------|--------------|--------------|---------|
| 1      | 24.788        | BB   | 0.9572      | 419.87085    | 5.42354      | 2.3621  |
| 2      | 37.234        | MM   | 1.8954      | 1.73554e4    | 152.60648    | 97.6379 |

### Racemic-3ag

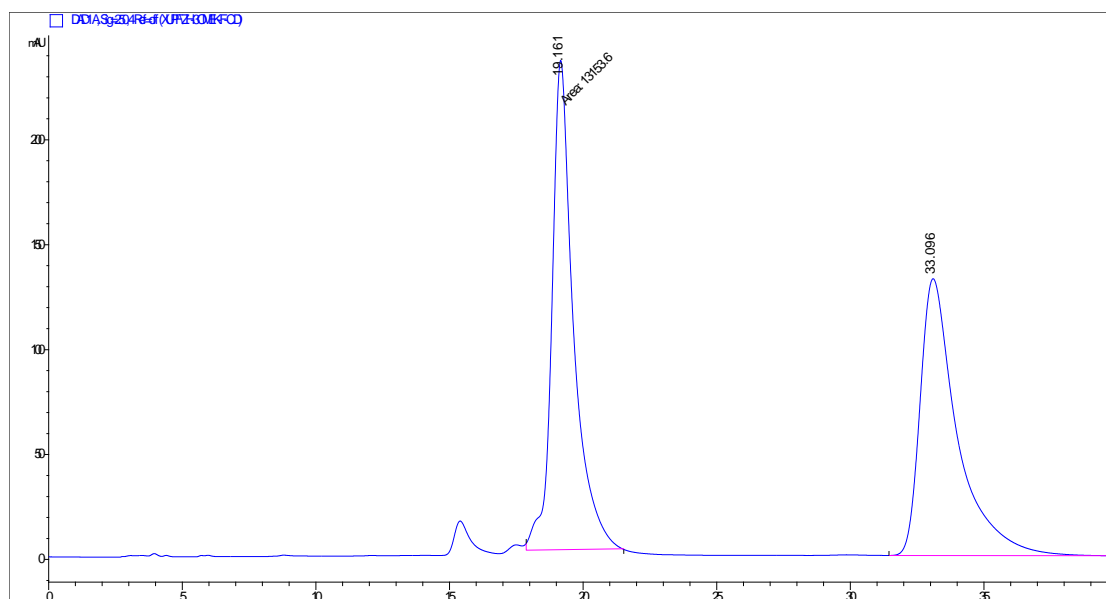

| Peak # | RetTime [min] | Type | Width [min] | Area [mAU*s] | Height [mAU] | Area %  |
|--------|---------------|------|-------------|--------------|--------------|---------|
| 1      | 19.161        | MM   | 0.9403      | 1.31536e4    | 233.14539    | 50.8037 |
| 2      | 33.096        | BBA  | 1.4027      | 1.27374e4    | 131.89125    | 49.1963 |

### Enantioenriched-3ag

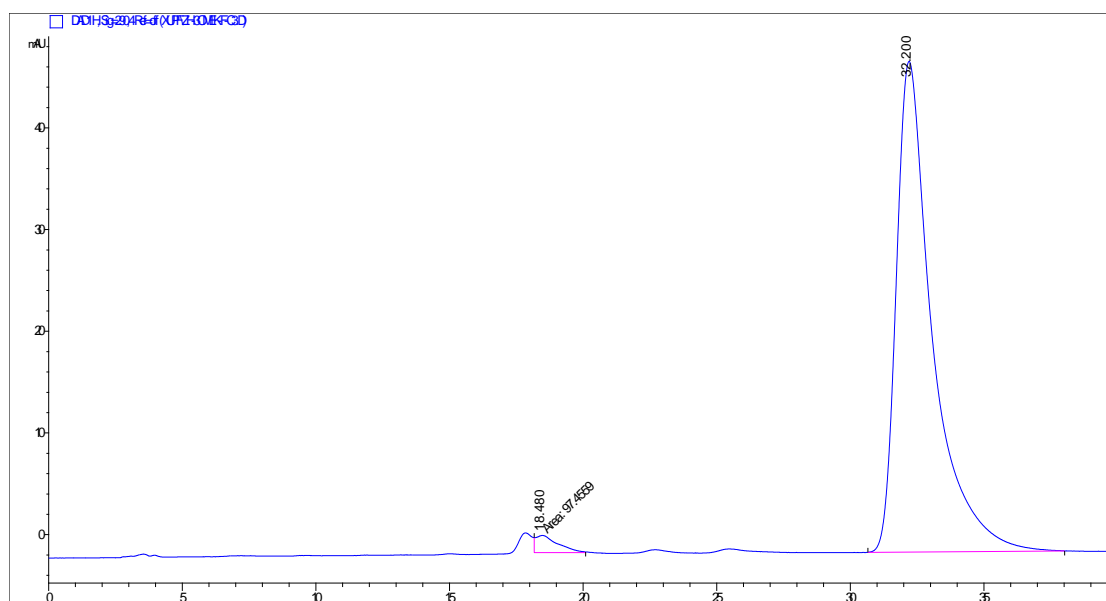

| Peak # | RetTime [min] | Type | Width [min] | Area [mAU*s] | Height [mAU] | Area %  |
|--------|---------------|------|-------------|--------------|--------------|---------|
| 1      | 18.480        | MM   | 0.9591      | 97.45587     | 1.69359      | 2.1158  |
| 2      | 32.200        | BB   | 1.3241      | 4508.58350   | 48.25230     | 97.8842 |

### Racemic-3ah

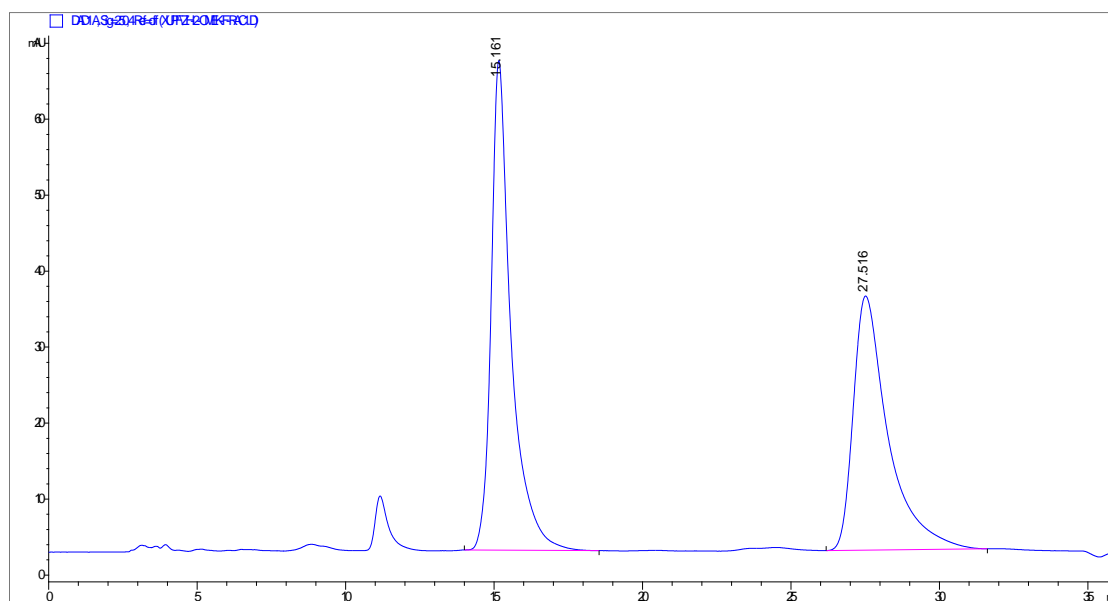

| Peak # | RetTime [min] | Type | Width [min] | Area [mAU*s] | Height [mAU] | Area %  |
|--------|---------------|------|-------------|--------------|--------------|---------|
| 1      | 15.161        | MF   | 0.7271      | 2810.91089   | 64.42883     | 50.7575 |
| 2      | 27.516        | BB   | 1.1630      | 2727.01489   | 33.45532     | 49.2425 |

### Enantioenriched-3ah

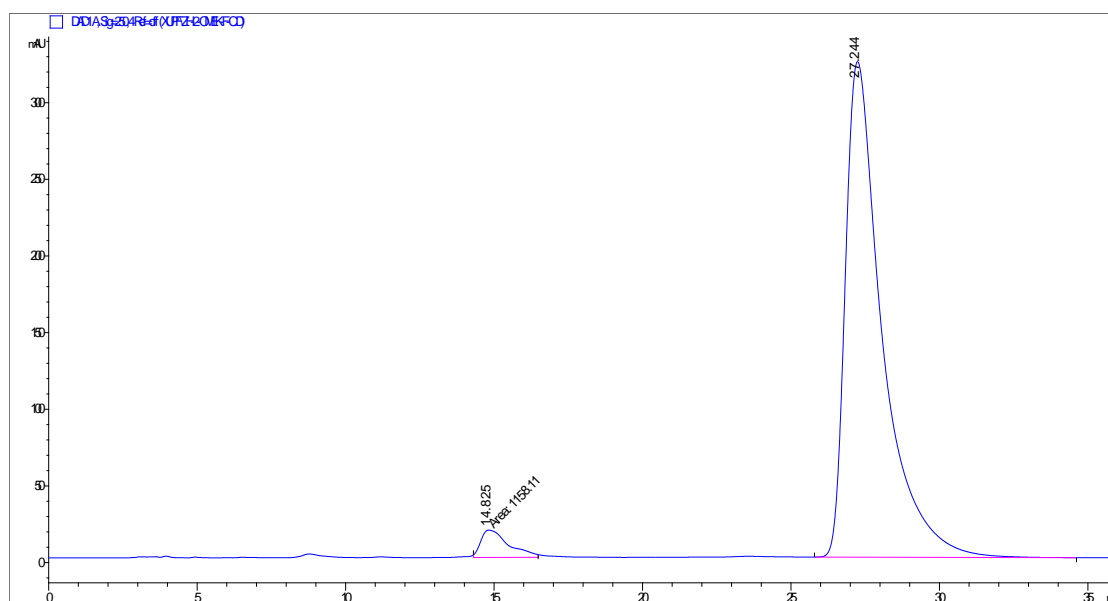

| Peak # | RetTime [min] | Type | Width [min] | Area [mAU*s] | Height [mAU] | Area %  |
|--------|---------------|------|-------------|--------------|--------------|---------|
| 1      | 14.825        | FM   | 1.0851      | 1158.11353   | 17.78766     | 4.0096  |
| 2      | 27.244        | BB   | 1.2566      | 2.77255e4    | 323.26694    | 95.9904 |

### Racemic-3ai

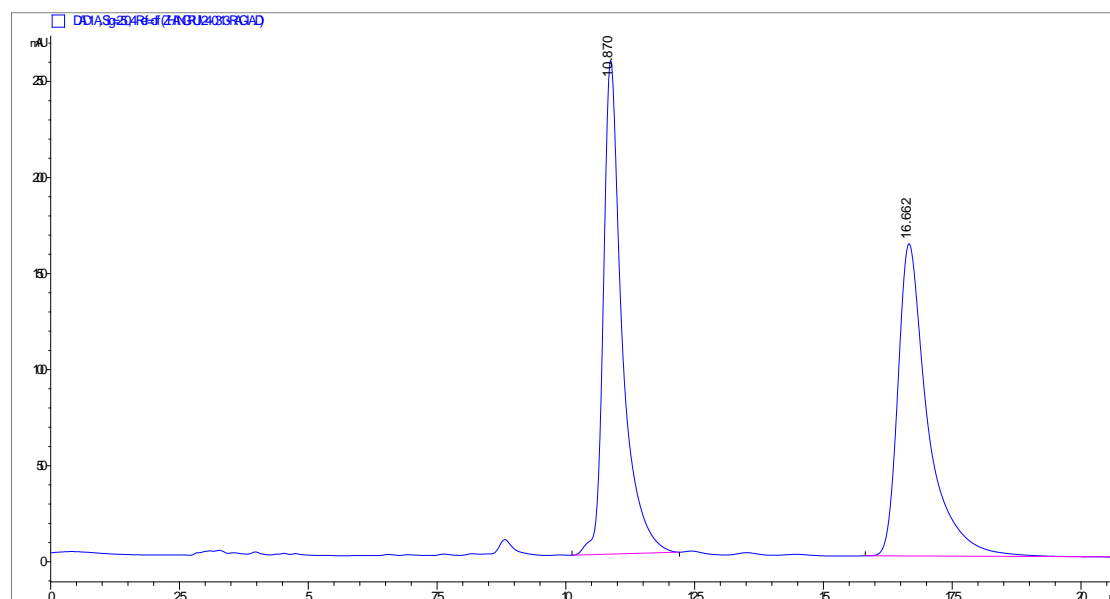

| Peak # | RetTime [min] | Type | Width [min] | Area [mAU*s] | Height [mAU] | Area %  |
|--------|---------------|------|-------------|--------------|--------------|---------|
| 1      | 10.870        | BB   | 0.3684      | 6528.97803   | 256.97961    | 50.0080 |
| 2      | 16.662        | BB   | 0.5843      | 6526.88623   | 162.58836    | 49.9920 |

### Enantioenriched-3ai

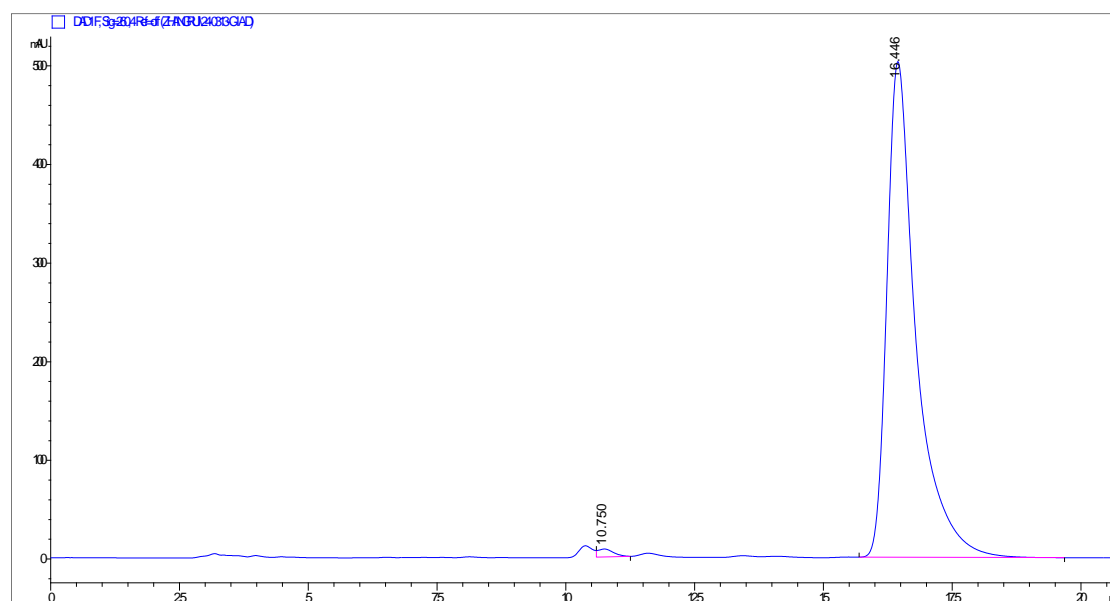

| Peak # | RetTime [min] | Type | Width [min] | Area [mAU*s] | Height [mAU] | Area %  |
|--------|---------------|------|-------------|--------------|--------------|---------|
| 1      | 10.750        | VB   | 0.3049      | 163.96147    | 7.94013      | 0.8242  |
| 2      | 16.446        | BB   | 0.5740      | 1.97297e4    | 502.55795    | 99.1758 |

### Racemic-3aj

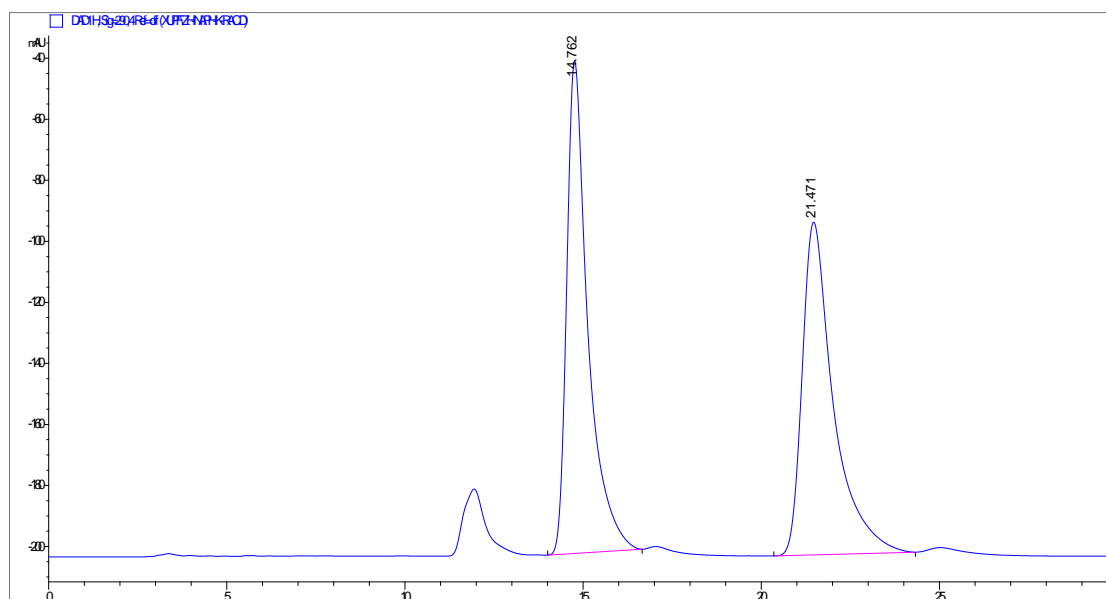

| Peak # | RetTime [min] | Type | Width [min] | Area [mAU*s] | Height [mAU] | Area %  |
|--------|---------------|------|-------------|--------------|--------------|---------|
| 1      | 14.761        | BB   | 0.6044      | 3421.49561   | 82.40189     | 50.4544 |
| 2      | 21.471        | BB   | 0.8813      | 3359.87158   | 55.41794     | 49.5456 |

### Enantioenriched-3aj

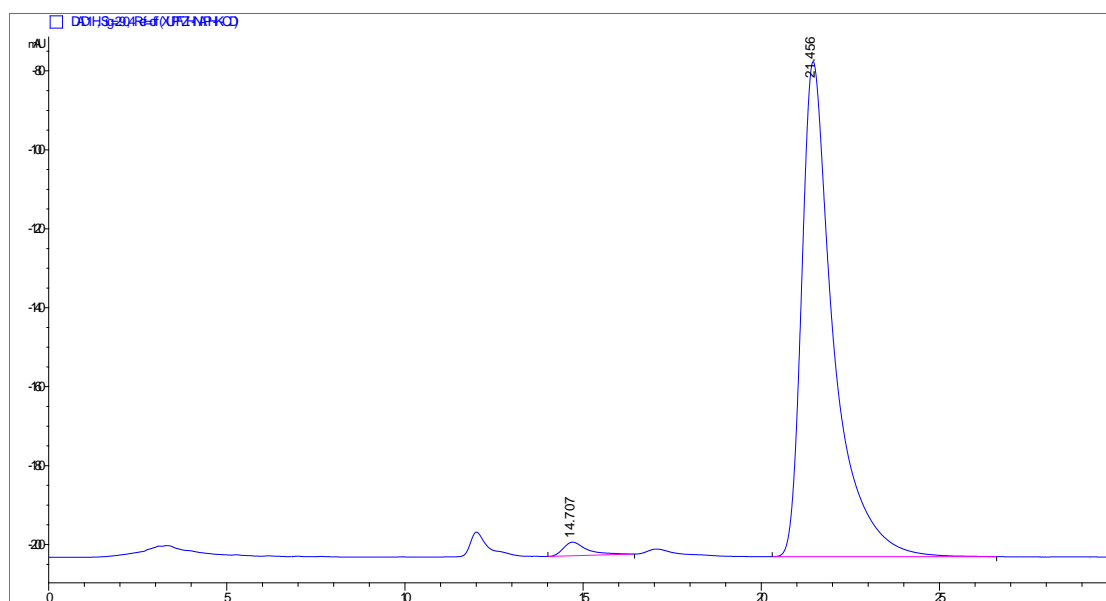

| Peak # | RetTime [min] | Type | Width [min] | Area [mAU*s] | Height [mAU] | Area %  |
|--------|---------------|------|-------------|--------------|--------------|---------|
| 1      | 14.707        | BB   | 0.6464      | 160.65355    | 3.45526      | 2.0200  |
| 2      | 21.456        | BB   | 0.9048      | 7792.57324   | 125.42951    | 97.9800 |

## Racemic-4

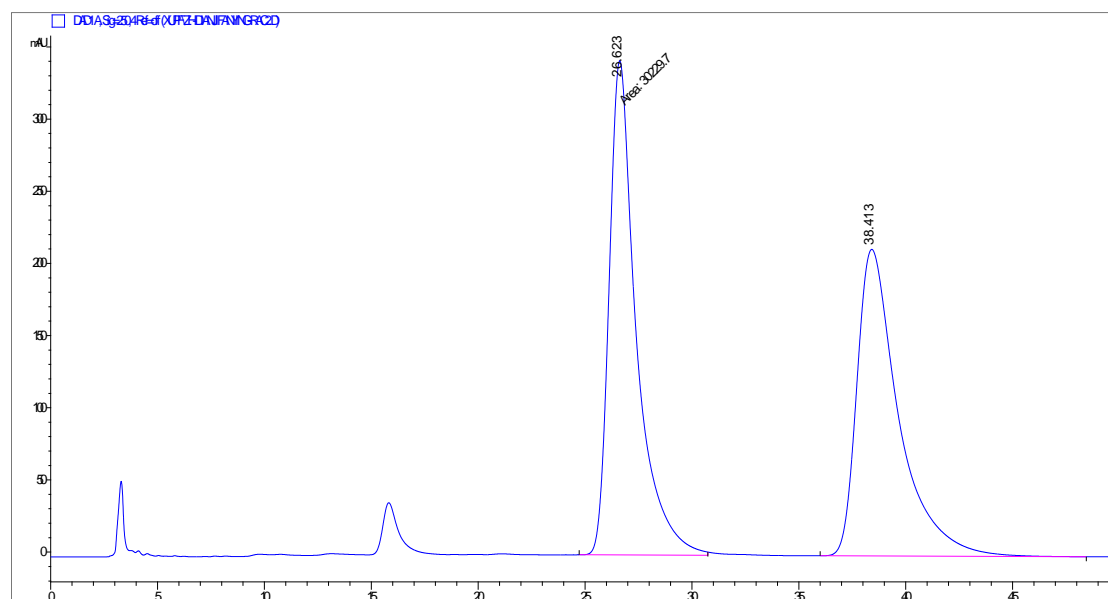

| Peak # | RetTime [min] | Type | Width [min] | Area [mAU*s] | Height [mAU] | Area %  |
|--------|---------------|------|-------------|--------------|--------------|---------|
| 1      | 26.623        | MF   | 1.4711      | 3.02297e4    | 342.47504    | 51.3059 |
| 2      | 38.413        | BB   | 1.9597      | 2.86908e4    | 212.42435    | 48.6941 |

## Enantioenriched-4

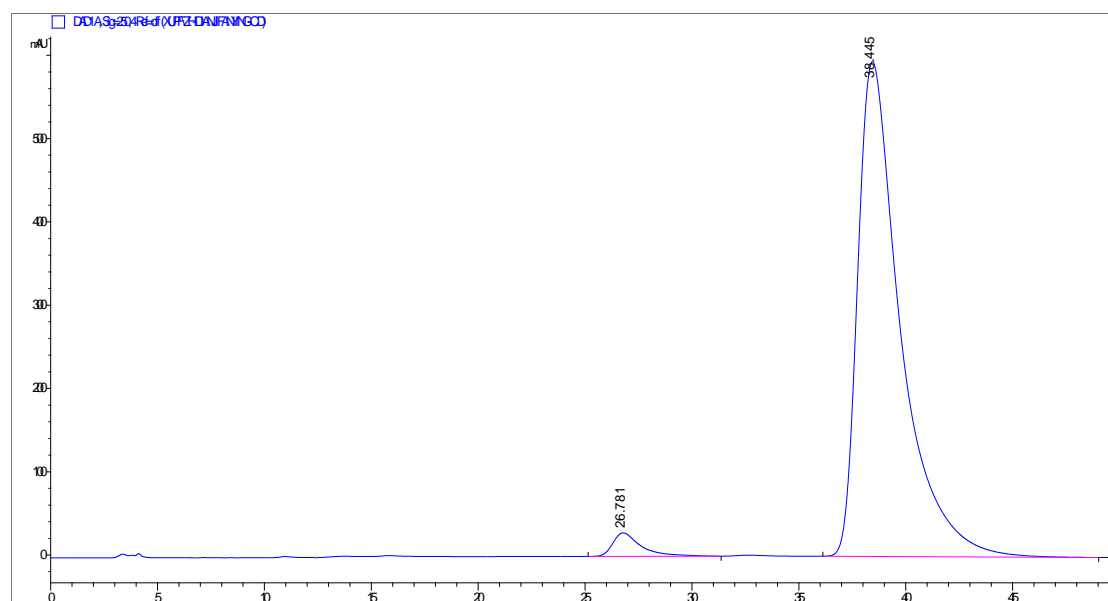

| Peak # | RetTime [min] | Type | Width [min] | Area [mAU*s] | Height [mAU] | Area %  |
|--------|---------------|------|-------------|--------------|--------------|---------|
| 1      | 26.781        | BB   | 1.2897      | 2587.52490   | 28.22065     | 3.0451  |
| 2      | 38.445        | BB   | 2.0535      | 8.23865e4    | 594.24939    | 96.9549 |



## Racemic-5

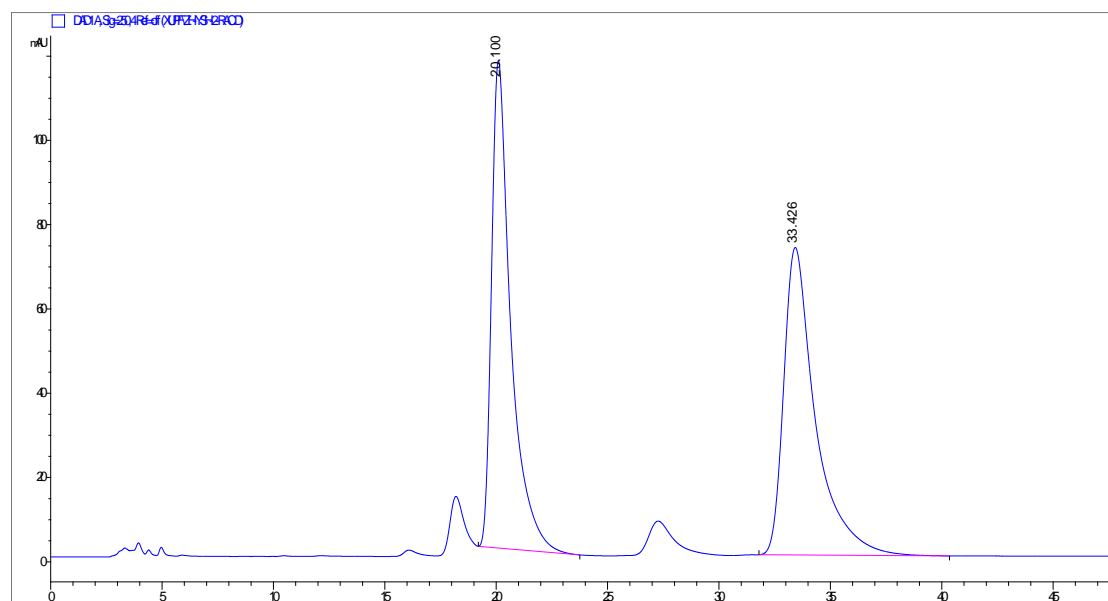

| Peak # | RetTime [min] | Type | Width [min] | Area [mAU*s] | Height [mAU] | Area %  |
|--------|---------------|------|-------------|--------------|--------------|---------|
| 1      | 20.100        | BB   | 0.8787      | 6945.10303   | 115.63970    | 49.0937 |
| 2      | 33.426        | BB   | 1.4173      | 7201.51514   | 72.97661     | 50.9063 |

## Enantioenriched-5

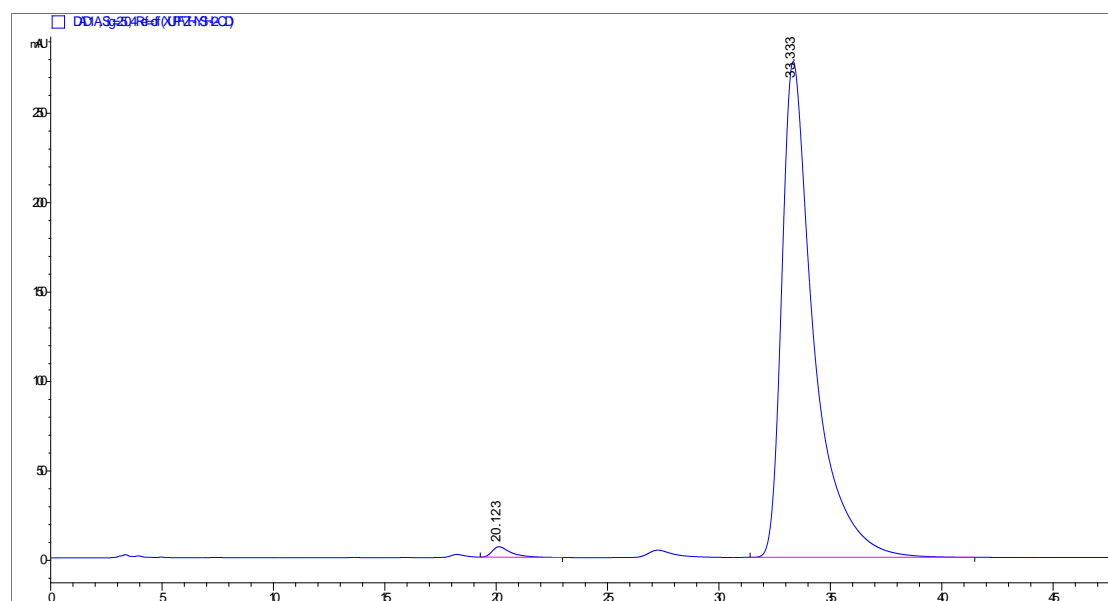

| Peak # | RetTime [min] | Type | Width [min] | Area [mAU*s] | Height [mAU] | Area %  |
|--------|---------------|------|-------------|--------------|--------------|---------|
| 1      | 20.123        | BB   | 0.8239      | 348.18344    | 5.87077      | 1.2433  |
| 2      | 33.333        | BB   | 1.4540      | 2.76563e4    | 277.18527    | 98.7567 |
